# Supplementary material
Source: publisher figshare collection journal article supplement (https://acs.figshare.com/ndownloader/files/4772338)

## Supporting Information

# Ring Expansion of Functionalized Octahydroindoles to Enantiopure *cis*-Decahydroquinolines

*Marisa Mena and Josep Bonjoch,\**

Laboratori de Química Orgànica, Facultat de Farmàcia, Universitat de Barcelona , Av. Joan XXIII  
s/n, 08028-Barcelona, Spain

Domingo Gomez Pardo and Janine Cossy

Laboratoire de Chimie Organique, associé au CNRS, ESPCI, 10 rue Vauquelin, 75231 Paris Cedex  
05, France

[josep.bonjoch@ub.edu](mailto:josep.bonjoch@ub.edu)

### Contents

|                                                                                                                                                                       |       |
|-----------------------------------------------------------------------------------------------------------------------------------------------------------------------|-------|
| - Table 1. $^{13}\text{C}$ NMR Chemical shifts of octahydroindoles <b>3-12</b>                                                                                        | 2-3   |
| - Table 2. $^{13}\text{C}$ NMR Chemical shifts of decahydroquinolines <b>13-21</b>                                                                                    | 4     |
| - Experimental and/or NMR data of compounds <b>3-21</b>                                                                                                               | 5-14  |
| - Copies of $^1\text{H}$ NMR and $^{13}\text{C}$ NMR spectra of all new compounds, including COSY and HSQC spectra for compounds <b>3, 5, 6, 9-14, 17, 18, and 21</b> | 15-94 |

**Table 1.  $^{13}\text{C}$  NMR Chemical shifts of octahydroindoles 3-12<sup>a</sup>**

|                        | <b>3</b> | <b>4</b> | <b>5</b> | <b>6</b> | <b>7</b> | <b>8</b> | <b>9a</b> | <b>10a</b> | <b>11a</b> |
|------------------------|----------|----------|----------|----------|----------|----------|-----------|------------|------------|
| <b>C2</b>              | 66.2     | 62.9     | 66.2     | 61.7     | 74.9     | 70.8     | 71.0      | 72.5       | 66.1       |
| <b>C3</b>              | 33.6     | 31.7     | 32.1     | 30.5     | 33.3     | 30.6     | 30.6      | 32.2       | 25.4       |
| <b>C3a</b>             | 35.7     | 35.2     | 35.0     | 35.6     | 35.6     | 35.6     | 34.6      | 34.8       | 35.6       |
| <b>C4</b>              | 24.0     | 23.3     | 24.3     | 22.8     | 24.2     | 22.8     | 23.9      | 22.7       | 22.9       |
| <b>C5</b>              | 31.0     | 29.9     | 31.0     | 28.9     | 31.0     | 29.2     | 27.5      | 29.3       | 28.9       |
| <b>C6</b>              | 109.1    | 109.3    | 108.9    | 109.4    | 108.8    | 109.2    | 108.9     | 109.0      | 109.4      |
| <b>C7</b>              | 37.5     | 31.9     | 37.8     | 30.6     | 38.2     | 30.9     | 38.2      | 38.8       | 30.4       |
| <b>C7a</b>             | 62.5     | 59.5     | 63.0     | 59.3     | 63.0     | 59.4     | 62.9      | 63.3       | 58.9       |
| <b>NCH<sub>2</sub></b> | 58.8     | 53.4     | 58.8     | 51.7     | 60.0     | 53.4     | 58.9      | 63.2       | 51.4       |
| <b>ips-Ar</b>          | 139.1    | 139.0    | 139.2    | 139.3    | 139.2    | 138.5    | 140.0     | 140.0      | 139.4      |
| <b>o-Ar</b>            | 129.1    | 128.8    | 128.9    | 128.4    | 129.4    | 128.7    | 129.1     | 128.3      | 128.4      |
| <b>m-Ar</b>            | 127.9    | 128.1    | 128.3    | 128.3    | 128.1    | 128.2    | 128.4     | 128.3      | 128.2      |
| <b>p-Ar</b>            | 126.8    | 126.9    | 127.2    | 127.0    | 127.1    | 127.1    | 127.2     | 127.0      | 127.0      |
| <b>C-1'</b>            | 175.0    | 174.2    | 61.2     | 62.4     | 213.2    | 216.4    | 63.5      | 71.9       | 64.7       |
| <b>Me</b>              | 51.6     | 51.6     | ---      | ---      | 24.9     | 24.9     | 18.2      | 20.8       | 18.2       |
| <b>OCH<sub>2</sub></b> | 64.3     | 64.3     | 64.1     | 64.3     | 64.0     | 64.3     | 64.0      | 64.1       | 64.1       |
|                        | 64.0     | 64.0     | 63.9     | 63.9     | 64.0     | 63.9     | 64.0      | 63.9       | 63.8       |

<sup>a</sup> Values for compounds **3**, **5**, **9a**, **10a** and **11a** were assigned on the basis of gHSQC spectra.

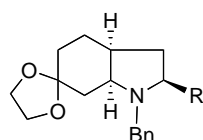

**3** R = CO<sub>2</sub>Me  
**5** R = CH<sub>2</sub>OH  
**7** R = COCH<sub>3</sub>  
**9a** R = (*R*)-CHOHCH<sub>3</sub>  
**10a** R = (*S*)-CHOHCH<sub>3</sub>

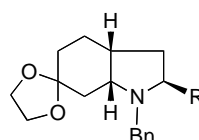

**4** R = CO<sub>2</sub>Me  
**6** R = CH<sub>2</sub>OH  
**8** R = COCH<sub>3</sub>  
**11a** R = (*S*)-CHOHCH<sub>3</sub>

**Table 1 (continued).  $^{13}\text{C}$  NMR Chemical shifts of octahydroindoles 3-12<sup>b</sup>**

|                        | <b>12a</b> | <b>9b</b> | <b>10b</b> | <b>11b</b> | <b>12b</b> | <b>9c<sup>c</sup></b> | <b>10c<sup>c</sup></b> | <b>11c<sup>c</sup></b> | <b>12c<sup>c</sup></b> |
|------------------------|------------|-----------|------------|------------|------------|-----------------------|------------------------|------------------------|------------------------|
| <b>C2</b>              | 66.5       | 72.1      | 71.6       | 66.7       | 66.4       | 69.1                  | 68.8                   | 64.4                   | 62.9                   |
| <b>C3</b>              | 30.3       | 29.7      | 30.4       | 28.2       | 27.1       | 30.1                  | 31.0                   | 27.7                   | 27.4                   |
| <b>C3a</b>             | 35.3       | 34.5      | 34.5       | 34.6       | 35.0       | 34.4                  | 34.6                   | 34.8                   | 35.2                   |
| <b>C4</b>              | 22.7       | 23.0      | 23.3       | 22.8       | 22.8       | 23.3                  | 23.2                   | 22.9                   | 22.8                   |
| <b>C5</b>              | 29.0       | 29.5      | 29.9       | 29.7       | 29.0       | 29.8                  | 29.7                   | 29.1                   | 29.0                   |
| <b>C6</b>              | 109.4      | 109.2     | 109.1      | 109.5      | 109.4      | 109.2                 | 109.1                  | 109.5                  | 109.5                  |
| <b>C7</b>              | 31.2       | 39.2      | 39.1       | 31.0       | 30.9       | 39.1                  | 39.3                   | 30.2                   | 30.6                   |
| <b>C7a</b>             | 58.8       | 62.5      | 63.7       | 58.9       | 58.3       | 62.2                  | 63.8                   | 58.2                   | 58.4                   |
| <b>NCH<sub>2</sub></b> | 53.9       | 61.4      | 61.3       | 52.2       | 52.7       | 60.4                  | 61.8                   | 52.0                   | 52.5                   |
| <b>ips-Ar</b>          | 139.5      | 140.6     | 140.7      | 139.9      | 139.8      | 139.2                 | 141.2                  | 139.8                  | 140.0                  |
| <b>o-Ar</b>            | 128.2      | 128.3     | 128.6      | 128.2      | 128.2      | 129.4                 | 128.2                  | 128.1                  | 128.1                  |
| <b>m-Ar</b>            | 127.8      | 128.1     | 128.2      | 128.2      | 128.1      | 128.1                 | 128.0                  | 128.0                  | 128.0                  |
| <b>p-Ar</b>            | 126.7      | 126.6     | 126.8      | 126.7      | 126.8      | 127.1                 | 126.5                  | 126.6                  | 126.6                  |
| <b>C-1'</b>            | 71.1       | 63.4      | 60.6       | 60.9       | 59.8       | 71.1                  | 75.2                   | 70.7                   | 72.3                   |
| <b>Me</b>              | 20.6       | 22.9      | 19.8       | 22.3       | 17.7       | 17.1                  | 16.5                   | 16.7                   | 14.5                   |
| <b>OCH<sub>2</sub></b> | 64.2       | 64.1      | 64.0       | 64.2       | 64.3       | 63.9                  | 64.0                   | 64.1                   | 64.2                   |
|                        | 63.8       | 63.8      | 63.9       | 63.9       | 63.9       | 63.8                  | 63.8                   | 63.8                   | 63.9                   |

<sup>b</sup> Values for compounds **12a**, **10b**, **11b**, **9c**, **11c**, and **12c** were assigned on the basis of gHSQC spectra. <sup>c</sup> OAc: 170.6 / 170.7 and 21.3 / 21.5.

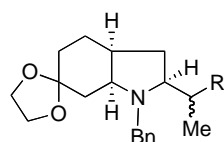

**9b** R = Cl (1'*R*)  
**10b** R = Cl (1'*S*)  
**9c** R = OAc (1'*R*)  
**10c** R = OAc (1'*S*)

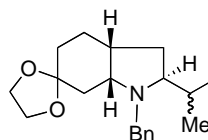

**12a** R = OH (1'*R*)  
**11b** R = Cl (1'*S*)  
**12b** R = Cl (1'*R*)  
**11c** R = OAc (1'*S*)  
**12c** R = OAc (1'*R*)

**Table 2.**  $^{13}\text{C}$  NMR Chemical shifts of decahydroquinolines **13-21**<sup>a</sup>

|                        | <b>13</b> | <b>14</b> | <b>15</b> | <b>16</b> <sup>b</sup> | <b>17</b> | <b>18</b> | <b>19</b> <sup>c</sup> | <b>21</b> |
|------------------------|-----------|-----------|-----------|------------------------|-----------|-----------|------------------------|-----------|
| <b>C2</b>              | 52.0      | 50.6      | 57.1      | 56.0                   | 53.0      | 51.9      | 53.2                   | 55.7      |
| <b>C3</b>              | 68.1      | 65.4      | 69.7      | 61.4                   | 75.5      | 73.2      | 73.1                   | 73.6      |
| <b>C4</b>              | 33.1      | 30.5      | 26.8      | 33.1                   | 29.6      | 27.0      | 24.2                   | 33.3      |
| <b>C4a</b>             | 32.8      | 28.8      | 28.3      | 35.5                   | 31.4      | 33.6      | 28.4                   | 32.0      |
| <b>C5</b>              | 26.9      | 26.6      | 26.4      | 26.7                   | 26.6      | 25.0      | 26.8                   | 26.9      |
| <b>C6</b>              | 29.9      | 29.8      | 30.2      | 32.4                   | 29.7      | 30.2      | 30.0                   | 29.9      |
| <b>C7</b>              | 109.9     | 109.8     | 109.3     | 109.6                  | 109.8     | 109.4     | 109.3                  | 109.9     |
| <b>C8</b>              | 27.0      | 25.6      | 33.5      | 28.9                   | 28.1      | 34.1      | 34.7                   | 27.6      |
| <b>C8a</b>             | 57.0      | 57.7      | 56.6      | 56.2                   | 55.8      | 56.1      | 56.9                   | 56.5      |
| <b>Me</b>              | ---       | ---       | 14.9      | 18.4                   | 16.8      | 11.5      | 15.7                   | 16.9      |
| <b>NCH<sub>2</sub></b> | 58.3      | 58.5      | 55.3      | 52.7                   | 52.6      | 55.7      | 55.9                   | 52.8      |
| <b>Ar</b>              | 126.8     | 127.2     | 127.1     | 126.5                  | 126.5     | 126.9     | 140.2                  | 126.5     |
|                        | 128.1     | 128.4     | 128.3     | 127.6                  | 127.7     | 128.2     | 128.3                  | 127.9     |
|                        | 129.5     | 128.7     | 128.5     | 128.1                  | 128.2     | 128.2     | 127.9                  | 128.1     |
|                        | 139.3     | 139.0     | n.o.      | 141.1                  | 141.2     | 139.8     | 126.6                  | 140.6     |
| <b>OCH<sub>2</sub></b> | 64.2      | 64.3      | 63.9      | 64.0                   | 64.1      | 64.2      | 64.2                   | 64.1      |
|                        | 64.1      | 64.1      | 64.2      | 63.7                   | 64.0      | 63.9      | 63.9                   | 64.0      |
| <b>Other</b>           |           |           |           |                        | 170.6     | 170.4     | 170.7                  |           |
|                        |           |           |           |                        | 21.3      | 21.3      | 21.4                   |           |

<sup>a</sup> Values for compounds **13**, **17**, **18**, **19** and **21** were assigned on the basis of gHSQC spectra <sup>b</sup> Values taken from an NMR spectrum of a mixture of **9b** and **16**. <sup>c</sup> Values taken from an NMR spectrum of a mixture of **11c** and **19**.

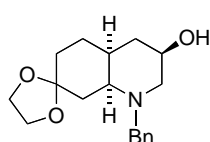

**13**

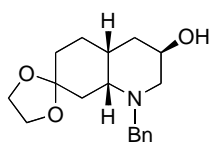

**14**

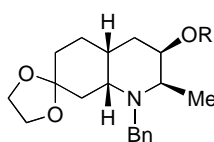

**15** R = H  
**19** R = Ac

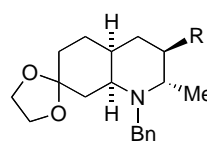

**16** R = Cl  
**17** R = OAc  
**21** R = OH

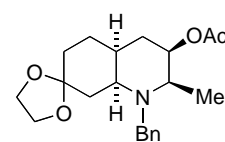

**18**

## Experimental Section

**General:** All reactions were carried out under an argon atmosphere with dry, freshly distilled solvents under anhydrous conditions. Analytical thin-layer chromatography was performed on SiO<sub>2</sub> (silica gel 60 F<sub>254</sub>) or Al<sub>2</sub>O<sub>3</sub> (ALOX N/UV<sub>254</sub>), and the products were located with iodoplatinate spray. Chromatography refers to flash chromatography and was carried out on SiO<sub>2</sub> (silica gel 60, 230-240 mesh ASTM) or Al<sub>2</sub>O<sub>3</sub> (aluminium oxide 90). Drying of organic extracts was performed over anhydrous Na<sub>2</sub>SO<sub>4</sub>. Evaporation of solvent was accomplished with a rotatory evaporator. Chemical shifts of <sup>1</sup>H and <sup>13</sup>C NMR spectra are reported in ppm downfield (δ) from Me<sub>4</sub>Si. Only noteworthy IR absorptions (cm<sup>-1</sup>) are listed.

**Methyl (2*S*,3*aS*,7*aS*)-1-Benzyl-6-oxooctahydroindole-2-carboxylate ethylene acetal (3).** To a solution of ketone **1** (3.28 g, 11 mmol) in toluene (350 mL) were added a catalytic amount of TsOH and ethyleneglycol (1.84 mL, 33 mmol), and the reaction mixture was heated at reflux temperature for 4 h in a flask incorporating a Dean-Stark apparatus. The cooled solution was diluted with CH<sub>2</sub>Cl<sub>2</sub> and washed with aqueous saturated NaHCO<sub>3</sub> (100 mL). The organic phase was dried and concentrated to give 3.64 g of **3** as a yellowish oil, which was used in the next step without further purification. An analytical sample was obtained by chromatography (SiO<sub>2</sub>, 1% MeOH in CH<sub>2</sub>Cl<sub>2</sub>). *R*<sub>f</sub> = 0.37 (SiO<sub>2</sub>, hexane/EtOAc 3:2); [α]<sub>D</sub><sup>20</sup> -41 (*c* = 0.9, CHCl<sub>3</sub>); <sup>1</sup>H NMR (400 MHz, CDCl<sub>3</sub>, gCOSY) 1.46-1.58 (m, 1H), 1.64-1.85 (m, 5H), 1.87-1.95 (m, 1H), 2.02-2.11 (m, 1H), 2.13 -2.26 (m, 1H), 2.99 (q, *J* = 7.5 Hz, 1H, H-7a), 3.41 (dd, *J* = 9.1, 7.7 Hz, 1H, H-2), 3.54 (s, 3H, OCH<sub>3</sub>), 3.74-3.92 (m, 6H), 7.18-7.40 (m, 5H, ArH); <sup>13</sup>C NMR (100 MHz, CDCl<sub>3</sub>, DEPT, gHSQC), see Table 1. Anal. Calcd for C<sub>19</sub>H<sub>25</sub>NO<sub>4</sub>: C 68.86, H 7.60, N 4.22. Found: C 68.48, H 7.55, N 4.20.

**Methyl (2*S*,3*aR*,7*aR*)-1-Benzyl-6-oxooctahydroindole-2-carboxylate ethylene acetal (4).** Operating as above, from ketone **2** (1.03 g, 3.6 mmol), acetal **4** was obtained (1.12 g) as yellowish crystals and used in the next step without further purification. An analytical sample was obtained by chromatography (SiO<sub>2</sub>, 1% MeOH in CH<sub>2</sub>Cl<sub>2</sub>): *R*<sub>f</sub> = 0.24 (SiO<sub>2</sub>, hexane/EtOAc 3:2); mp 64-66 °C; [α]<sub>D</sub><sup>20</sup> -53 (*c* 0.4, CHCl<sub>3</sub>); <sup>1</sup>H NMR (300 MHz, CDCl<sub>3</sub>) 1.44-1.72 (m, 4H), 1.79-1.94 (m, 3H), 2.12

(dt,  $J = 12.9, 10.7$  Hz, 1H), 2.46 -2.58 (m, 1H), 3.37 (dt,  $J = 10.5, 5.3$  Hz, 1H, H-7a), 3.50 (dd,  $J = 10.2, 3.6$  Hz, 1H, H-2), 3.55 (s, 3H, OCH<sub>3</sub>), 3.74 (d,  $J = 13.2$  Hz, 1H), 3.81 (d,  $J = 13.2$  Hz, 1H), 3.83 -3.96 (m, 4H), 7.18-7.40 (m, 5H, ArH). <sup>13</sup>C NMR (75 MHz, CDCl<sub>3</sub>, DEPT), see Table 1. Anal. calcd for C<sub>19</sub>H<sub>25</sub>NO<sub>4</sub>: C 68.86, H 7.60, N 4.22. Found: C 68.56, H 7.85, N 4.24.

**(2*S*,3*aS*,7*aS*)-1-Benzyl-2-hydroxymethyl-6-oxooctahydroindole ethylene acetal (5).** Ester **3** (603 mg, 1.82 mmol) was dissolved in THF (9 mL) and then cooled to 0 °C. LiBH<sub>4</sub> (2 M in THF, 2.8 mL, 5.46 mmol, 3 equiv) was slowly added, and the reaction mixture was stirred at rt for 24 h. The reaction was quenched by adding H<sub>2</sub>O (5 mL) and the organic layer was dried and concentrated to give a residue, which was purified by chromatography (SiO<sub>2</sub>, 1% MeOH in CH<sub>2</sub>Cl<sub>2</sub>) to afford 441 mg (80% from **1**) of **5** as a colourless oil:  $R_f = 0.31$  (SiO<sub>2</sub>, CH<sub>2</sub>Cl<sub>2</sub>/MeOH 95:5);  $[\alpha]_D^{20} -15$  ( $c$  0.2, CHCl<sub>3</sub>); <sup>1</sup>H NMR (400 MHz, CDCl<sub>3</sub>, gCOSY) 1.49 (dddd,  $J = 12.0, 5.0, 5.0, 1.2$  Hz, 1H, H-5eq), 1.65 (m, 3H, H-5 and H-7), 1.75 (m, 3H, H-3 and H-4), 1.85 (dd,  $J = 12.4, 7.2$  Hz, 1H, H-3), 2.20 (m, 1H, H-3a), 2.40 (brs, 1H, OH), 2.98 (dddd,  $J = 8.0, 7.5, 5.4, 1.8$  Hz, 1H, H-2), 3.02 (q,  $J = 7.2$  Hz, 1H, H-7a), 3.33 (dd,  $J = 11.0, 1.2$  Hz, 1H, CH<sub>2</sub>OH), 3.42 (dd,  $J = 11.0, 3.6$  Hz, 1H, CH<sub>2</sub>OH), 3.69-3.88 (m, 6H, OCH<sub>2</sub> and NCH<sub>2</sub>), 7.26-7.32 (m, 5H, ArH); <sup>13</sup>C NMR (100 MHz, CDCl<sub>3</sub>, gHSQC), see Table 1. HRFABMS calcd for C<sub>18</sub>H<sub>26</sub>NO<sub>3</sub> 304.1906 (MH<sup>+</sup>), found 304.1913.

**(2*S*,3*aR*,7*aR*)-1-Benzyl-2-hydroxymethyl-6-oxooctahydroindole ethylene acetal (6).** Operating as above from ester **4** (627 mg, 1.89 mmol), alcohol **6** (464 mg, 81% from **2**) was obtained after chromatography (SiO<sub>2</sub>, 1% MeOH in CH<sub>2</sub>Cl<sub>2</sub>), as white crystals:  $R_f = 0.40$  (SiO<sub>2</sub>, CH<sub>2</sub>Cl<sub>2</sub>/MeOH 95:5); mp 72-74 °C;  $[\alpha]_D^{20} -72$  ( $c$  0.25, CHCl<sub>3</sub>); <sup>1</sup>H NMR (400 MHz, COSY, CDCl<sub>3</sub>) 1.46 (t,  $J = 12.0$  Hz, 1H, H-7ax), 1.52 (dq,  $J = 12.5, 2.5$  Hz, 1H, H-4eq), 1.63 (dm,  $J = 12.0$  Hz, 1H, H-5eq), 1.64 (td,  $J = 10.0, 3.2$  Hz, 1H, H-5ax), 1.78 (m, 1H, H-4ax), 1.80 (m, 1H, H-3β), 1.83 (dd,  $J = 12.0, 5.5$  Hz, 1H, H-7eq), 2.05 (q,  $J = 12.0$  Hz, 1H, H-3α), 2.30 (m, 1H, H-3a), 2.99 (dt,  $J = 10.0, 3.2$  Hz, 1H, H-2), 3.24 (ddd,  $J = 12.0, 5.5, 5.5$  Hz, 1H, H-7a), 3.38 (dm  $J = 10.8$  Hz, 1H, CH<sub>2</sub>OH), 3.55 (dd,  $J = 10.8, 3.2$  Hz, 1H, CH<sub>2</sub>OH), 3.64 and 3.71 (2d,  $J = 13.6$  Hz, 1H each,

NCH<sub>2</sub>), 3.77-3.93 (m, 4H, OCH<sub>2</sub>), 7.26-7.32 (m, 5H, ArH); <sup>13</sup>C NMR (100 MHz, CDCl<sub>3</sub>, DEPT), see Table 1. Anal. Calcd for C<sub>18</sub>H<sub>25</sub>NO<sub>3</sub>: C 71.26, H 8.31, N 4.62. Found: C 71.05, H 8.20, N 4.57.

**(2*S*,3*aS*,7*aS*)-2-Acetyl-1-benzyl-octahydroindol-6-one ethylene acetal (7).** To a solution of ester **3** (2.45 g, 7.4 mmol) in THF (140 mL) cooled to -20 °C was added Me(MeO)NH.HCl (1.82 g, 18.5 mmol, 2.5 eq) and then over 30 min was added a solution of *i*-PrMgCl in THF (18.5 mL, 2.0 M, 5 equiv) maintaining the temperature at -10 °C. The mixture was stirred for 40 min and quenched with saturated aqueous NH<sub>4</sub>Cl solution (50 mL). The organic layer was dried and concentrated to afford 2.65 g of the corresponding Weinreb amide as a yellow oil, which was used without purification: *R*<sub>f</sub> = 0.21 (SiO<sub>2</sub>, CH<sub>2</sub>Cl<sub>2</sub>/MeOH 96:4). To a solution of the aforementioned Weinreb amide (2.65 g, 7.4 mmol) in THF (95 mL) cooled to 0 °C was added dropwise MeMgBr in Et<sub>2</sub>O (6.4 mL, 3 M, 19.24 mmol, 2.6 eq). The reaction mixture was stirred at 0 °C for 1 h and quenched with saturated aqueous NH<sub>4</sub>Cl solution (50 mL). The organic layer was dried and concentrated to give ketone **7** (2.32 g) as an oil, which was used without further purification. *R*<sub>f</sub> = 0.52 (SiO<sub>2</sub>, CH<sub>2</sub>Cl<sub>2</sub>/MeOH 95:5); <sup>1</sup>H NMR (300 MHz, CDCl<sub>3</sub>) 1.53 (m, 1H), 1.61-1.85 (m, 6H), 2.02 (dt, *J* = 12.3, 7.2 Hz, 1H), 2.04 (s, 3H, CH<sub>3</sub>), 2.25 (m, 1H, H-3a), 3.02 (q, *J* = 6.9 Hz, 1H, H-7a), 3.29 (dd, *J* = 9.3, 7.8 Hz, 1H, H-2), 3.63 and 3.83 (2d, *J* = 13.5 Hz, 1H each, NCH<sub>2</sub>Ar), 3.75-3.95 (m, 4H, OCH<sub>2</sub>), 7.20- 7.35 (m, 5H, Ar); <sup>13</sup>C NMR (50 MHz, CDCl<sub>3</sub>, DEPT), see Table 1.

**(2*S*,3*aR*,7*aR*)-2-Acetyl-1-benzyl-octahydroindol-6-one ethylene acetal (8).** The above procedure was applied to ester **4** (1.12 g) to afford the corresponding Weinreb amide (1.30 g): *R*<sub>f</sub> = 0.16 (SiO<sub>2</sub>, CH<sub>2</sub>Cl<sub>2</sub>/MeOH 95:5). The Weinreb amide was treated with MeMgBr in Et<sub>2</sub>O (3.12 mL, 3 M, 9.36 mmol, 2.6 eq) and operating as in the formation of ketone **7**, 1.21 g of ketone **8** was isolated, which was used without further purification. *R*<sub>f</sub> = 0.49 (SiO<sub>2</sub>, CH<sub>2</sub>Cl<sub>2</sub>/MeOH 95:5); <sup>1</sup>H NMR (300 MHz, CDCl<sub>3</sub>) 1.40 (t, *J* = 12.0 Hz, 1H, H-5ax), 1.50-1.70 (m, 3H), 1.75-1.90 (m, 3H), 2.07 (s, 3H, CH<sub>3</sub>), 2.16 (dt, *J* = 13.5, 11.4 Hz, 1H), 2.50 (m, 1H, H-3a), 3.36 (ddd, *J* = 11.4, 5.7, 5.7 Hz, 1H, H-7a), 3.35 (dd, *J* = 11.0, 1.5 Hz, 1H, H-2), 3.57 and 3.71 (2d, *J* = 13.2 Hz, 1H each, CH<sub>2</sub>Ar), 3.75-3.94 (m, 4H, OCH<sub>2</sub>), 7.20- 7.35 (m, 5H, Ar); <sup>13</sup>C NMR (50 MHz, CDCl<sub>3</sub>, DEPT), see Table 1.

**Reduction of ketone 7.** To a solution of amino ketone **7** (2.29 g, 7.25 mmol) in MeOH (85 mL) at -20 °C was added NaBH<sub>4</sub> (571 mg, 14.5 mmol) in small portions. The resulting mixture was maintained at this temperature for 6 h. Then, water (25 mL) was added and the mixture was extracted with Et<sub>2</sub>O (3x50 mL). The organic extracts were washed with brine, dried, and concentrated. Purification of the residue by chromatography (SiO<sub>2</sub>, hexane to hexane/EtOAc 1:1) provided 1.05 g (46%) of alcohol **9a** as a colourless oil and 862 mg (37%) of alcohol **10a** as a colorless oil, after two successive purifications. Overall yield for three steps (**3** → **9a** + **10a**): 83%; 1.2:1 ratio of alcohols **9a**:**10a**.

**(2*S*,3*aS*,7*aS*)-1-Benzyl-2-[(1'*R*)-(1-hydroxyethyl)]octahydroindol-6-one ethylene acetal (**9a**):**  $R_f$  = 0.30 (SiO<sub>2</sub>, CH<sub>2</sub>Cl<sub>2</sub>/MeOH 95:5);  $[\alpha]_D^{20}$  - 41 ( $c$  1.3, CHCl<sub>3</sub>); <sup>1</sup>H NMR (400 MHz, CDCl<sub>3</sub>, gCOSY) 1.09 (d,  $J$  = 6.6 Hz, 3H, CH<sub>3</sub>), 1.43-1.81 (m, 8H, H-3, H-4, H-5, and H-7), 2.20 (m, 1H, H-3a), 2.80 (ddd,  $J$  = 9.3, 6.9, 3.3 Hz, 1H, H-2), 3.02 (q,  $J$  = 7.2 Hz, 1H, H-7a), 3.66-3.85 (m, 7H, H-1', NCH<sub>2</sub>Ar, and OCH<sub>2</sub>), 7.26-7.32 (m, 5H, ArH); <sup>13</sup>C NMR (100 MHz, CDCl<sub>3</sub>, gHSQC), see Table 1. HRFABMS: calcd for C<sub>19</sub>H<sub>28</sub>NO<sub>3</sub> 318.2069 (MH<sup>+</sup>), found 318.2070.

**(2*S*,3*aS*,7*aS*)-1-Benzyl-2-[(1'*S*)-(1-hydroxyethyl)]octahydroindol-6-one ethylene acetal (**10a**):**  $R_f$  = 0.30 (SiO<sub>2</sub>, CH<sub>2</sub>Cl<sub>2</sub>/MeOH 95:5);  $[\alpha]_D^{20}$  - 32 ( $c$  0.8, CHCl<sub>3</sub>); <sup>1</sup>H NMR (400 MHz, CDCl<sub>3</sub>, gCOSY) 1.16 (d,  $J$  = 6.4 Hz, 3H, CH<sub>3</sub>), 1.50 (m, 2H, H-5 and H-7), 1.60 (m, 2H, H-3 and H-5), 1.63 (t,  $J$  = 12.0 Hz, 1H, H-7ax), 1.77 (m, 2H, H-4), 1.88 (ddd,  $J$  = 12.0, 8.0, 7.0 Hz, 1H, H-3), 2.34 (m, 1H, H-3a), 2.82 (q,  $J$  = 7.5 Hz, 1H, H-2), 2.97 (dt,  $J$  = 12.0, 6.0 Hz, 1H, H-7a), 3.54 (quint,  $J$  = 6.2 Hz, 1H, H-1'), 3.74-3.86 (m, 6H, OCH<sub>2</sub>, NCH<sub>2</sub>Ar), 7.20-7.40 (m, 5H, ArH); <sup>13</sup>C NMR (100 MHz, CDCl<sub>3</sub>, gHSQC), see Table 1. HRFABMS: calcd for C<sub>19</sub>H<sub>28</sub>NO<sub>3</sub> 318.2069 (MH<sup>+</sup>), found 318.2074.

**Reduction of ketone 8.** The above procedure was followed using ketone **8** (1.06 g, 3.36 mmol). Purification by chromatography (SiO<sub>2</sub>, hexane to hexane-EtOAc 1:1) afforded 622 mg (54%) of alcohol **11a** as a white solid and then 365 mg (32%) of alcohol **12a** as a white solid. Overall yield for three steps (**4** → **11a** + **12a**): 86%; 1.7:1 ratio of alcohols **11a** and **12a**.



**(2*S*,3*aR*,7*aR*)-1-Benzyl-2-[(1'*S*)-(1-hydroxyethyl)]octahydroindol-6-one ethylene acetal**

**(11a):**  $R_f$  = 0.22 (SiO<sub>2</sub>, CH<sub>2</sub>Cl<sub>2</sub>/MeOH 98:2); mp 73-75 °C;  $[\alpha]_D^{20}$  -100 ( $c$  0.7, CHCl<sub>3</sub>); <sup>1</sup>H NMR (400 MHz, CDCl<sub>3</sub>, gCOSY) 1.13 (d,  $J$  = 6.4 Hz, 3H, CH<sub>3</sub>), 1.41 (t,  $J$  = 12.0 Hz, 1H, H-7<sub>ax</sub>), 1.50 (dm,  $J$  = 12.0 Hz, 1H), 1.60-1.68 (m, 2H), 1.73-1.90 (m, 4H), 2.21 (m, 1H, H-3<sub>a</sub>), 2.76 (dq,  $J$  = 10.0, 2.4 Hz, 1H, H-2), 3.21 (ddd,  $J$  = 12.0, 5.5, 5.5 Hz, 1H, H-7<sub>a</sub>), 3.61 and 3.77 (2d,  $J$  = 14.0 Hz, 1H each, NCH<sub>2</sub>Ar), 3.78-3.93 (m, 5H, OCH<sub>2</sub> and H-1'), 7.20-7.40 (m, 5H, ArH); <sup>13</sup>C NMR (100 MHz, CDCl<sub>3</sub>, gHSQC), see Table 1. HRFABMS: calcd for C<sub>19</sub>H<sub>28</sub>NO<sub>3</sub> 318.2069 (MH<sup>+</sup>), found 318.2074.

**(2*S*,3*aR*,7*aR*)-1-Benzyl-2-[(1'*R*)-(1-hydroxyethyl)]octahydroindol-6-one ethylene acetal**

**(12a):**  $R_f$  = 0.11 (SiO<sub>2</sub>, CH<sub>2</sub>Cl<sub>2</sub>/MeOH 98:2); mp 91-93 °C;  $[\alpha]_D^{20}$  - 36 ( $c$  1.0, CHCl<sub>3</sub>); <sup>1</sup>H NMR (400 MHz, CDCl<sub>3</sub>, gCOSY) 1.22 (d,  $J$  = 6.6 Hz, 3H, CH<sub>3</sub>), 1.43 (t,  $J$  = 12.0 Hz, 1H, H-7<sub>ax</sub>), 1.50-1.75 (m, 4H, H-3, H-4, H-5, H-7), 1.80 (m, 2H, H-4 and H-5), 2.15 (m, 1H, H-3), 2.32 (m, 1H, H-3<sub>a</sub>), 2.88 (ddd,  $J$  = 9.8, 4.8, 2.2 Hz, 1H, H-2), 3.22 (ddd,  $J$  = 11.0, 5.4, 5.4 Hz, 1H, H-7<sub>a</sub>), 3.69 (m, 1H, H-1'), 3.73-3.92 (m, 6H, NCH<sub>2</sub> and OCH<sub>2</sub>), 3.96 (br s, 1H, OH), 7.20-7.40 (m, 5H, ArH); <sup>13</sup>C NMR (100 MHz, CDCl<sub>3</sub>, gHSQC), see Table 1. HRFABMS: calcd for C<sub>19</sub>H<sub>28</sub>NO<sub>3</sub> 318.2069 (MH<sup>+</sup>), found 318.2063.

**Conversion of alcohols 9a-12a to their corresponding chlorides 9b-12b.**

Compounds **9b-12b** were prepared according to the following procedure: to a solution of alcohol (**9a-12a**, 50 mg, 0.16 mmol) in THF (1 mL) at 0 °C was added MsCl (0.014 mL, 0.18 mmol, 1.1 equiv), followed by Et<sub>3</sub>N (0.09 mL, 0.64 mmol, 4.0 equiv). After 4 h at reflux, the reaction mixture was poured into an aqueous 2.5 M NaOH solution (1 mL). After extraction with CH<sub>2</sub>Cl<sub>2</sub> (3 x 2 mL), the organic phase was dried and concentrated to afford compounds **9b-12b**, which were used without further purification.

**(2*S*,3*aS*,7*aS*)-1-Benzyl-2-[(1'*R*)-(1-chloroethyl)]octahydroindol-6-one ethylene acetal (9b).**

This compound was obtained together with the expanded chloride **16**; <sup>1</sup>H NMR (300 MHz, CDCl<sub>3</sub>) 1.53 (d,  $J$  = 6.6 Hz, 3H, CH<sub>3</sub>), 1.40-2.10 (m, 8H), 2.25 (m, 1H), 2.85-3.00 (m, 2H), 3.80-4.00 (m,

7H), 7.20-7.40 (m, 5H);  $^{13}\text{C}$  NMR (75 MHz,  $\text{CDCl}_3$ ), see Table 1. HRFABMS calcd for  $\text{C}_{19}\text{H}_{27}^{35}\text{ClNO}_3$  336.1730 ( $\text{MH}^+$ ), found 336.1731.

**(2*S*,3*aS*,7*aS*)-1-Benzyl-2-[(1'*S*)-(1-chloroethyl)]octahydroindol-6-one ethylene acetal (10b):** yellow oil;  $^1\text{H}$  NMR (400 MHz,  $\text{CDCl}_3$ , gCOSY) 1.49 (d,  $J = 6.8$  Hz, 3H,  $\text{CH}_3$ ), 1.55-1.65 (m, 4H, H-5 and H-7), 1.70-1.80 (m, 3H, H-3, H-4), 1.88 (ddd,  $J = 12.0, 8.0, 7.0$  Hz, 1H, H-3), 2.25 (m, 1H, H-3*a*), 2.94 (dt,  $J = 10.5, 6.8$  Hz, 1H, H-7*a*), 3.15 (dt,  $J = 9.2, 6.4$  Hz, 1H, H-2), 3.73 and 3.87 (2d,  $J = 13.5$  Hz, 1H each,  $\text{NCH}_2\text{Ar}$ ), 3.70-3.84 (m, 4H,  $\text{OCH}_2$ ), 3.95 (dq,  $J = 11.5, 6.4$  Hz, 1H, H-1'), 7.20-7.38 (m, 5H, ArH);  $^{13}\text{C}$  NMR (100 MHz,  $\text{CDCl}_3$ , gHSQC), see Table 1). HRFABMS calcd for  $\text{C}_{19}\text{H}_{27}^{35}\text{ClNO}_3$  336.1730 ( $\text{MH}^+$ ), found 336.1727.

**(2*S*,3*aR*,7*aR*)-1-Benzyl-2-[(1'*S*)-(1-chloroethyl)]octahydroindol-6-one ethylene acetal (11b):** white solid;  $^1\text{H}$  NMR (400 MHz,  $\text{CDCl}_3$ , gCOSY) 1.39 (t,  $J = 12.0$  Hz, 1H, H-7*ax*), 1.44 (d,  $J = 6.8$  Hz, 3H,  $\text{CH}_3$ ) 1.50-1.65 (m, 4H, H-3 and H-4), 1.75-1.95 (m, 3H, H-7*eq* and H-5), 2.42 (m, 1H, H-3*a*), 2.96 (dt,  $J = 10.0, 3.0$  Hz, 1H, H-2), 3.23 (ddd,  $J = 11.6, 5.6, 5.6$  Hz, 1H, H-7*a*), 3.72 and 3.84 (2d,  $J = 14$  Hz, 1H each,  $\text{NCH}_2$ ), 3.78-3.90 (m, 4H,  $\text{OCH}_2$ ), 4.05 (qd,  $J = 6.8, 3.2$  Hz, 1H, H-1'), 7.20-7.40 (m, 5H, ArH);  $^{13}\text{C}$  NMR (100 MHz,  $\text{CDCl}_3$ , gHSQC), see Table 1. HRFABMS calcd for  $\text{C}_{19}\text{H}_{27}^{35}\text{ClNO}_3$  336.1730 ( $\text{MH}^+$ ), found 336.1741.

**(2*S*,3*aR*,7*aR*)-1-Benzyl-2-[(1'*R*)-(1-chloroethyl)]octahydroindol-6-one ethylene acetal (12b):** yellow oil;  $^1\text{H}$  NMR (300 MHz,  $\text{CDCl}_3$ ) 1.48 (d,  $J = 6.6$  Hz,  $\text{CH}_3$ ), 1.40-2.05 (m, 8H), 2.25 (m, 1H), 3.20 (m, 2H), 3.6-4.0 (m, 7H), 7.20-7.35 (m, 5H);  $^{13}\text{C}$  NMR (75 MHz,  $\text{CDCl}_3$ ), see Table 1.

#### Ring expansion of chlorides **9b-12b**

**Method A.** A solution of the appropriate chloride derivative **9b-12b** (0.16 mmol) in THF (1 mL) was treated with  $\text{AgOAc}$  (0.48 mmol, 3 equiv) at reflux for 4 h. The reaction mixture was filtered through a bed of Celite and diluted with  $\text{CH}_2\text{Cl}_2$ . The organic layer was washed with saturated  $\text{NaHCO}_3$  (10 mL), dried and concentrated to afford the corresponding mixture of acetates **9c-12c** and **17-20**. (See Table 1 in the main paper for results in each series and below for the NMR data of formed acetates).

- From **9b**, a mixture of acetates **9c** and **17** was obtained (80% overall yield) in a 1:1.3 ratio according to the NMR spectrum. Purification and separation of the compounds was performed by chromatography (SiO<sub>2</sub>, CH<sub>2</sub>Cl<sub>2</sub>/EtOAc; 9:1).
- From **10b**, a mixture of acetates **10c** and **18** was obtained (70 % overall yield) in a 2.9:1 ratio according to the NMR spectrum. Purification and separation of the compounds was performed by chromatography (SiO<sub>2</sub>, CH<sub>2</sub>Cl<sub>2</sub>/EtOAc; 9:1).
- From **11b**, a non-separable mixture of acetates **11c** and **19** was obtained (80 % overall yield) in a 5.7:1 ratio according to the NMR spectrum and GC-MS analysis. Purification of the mixture of compounds was performed by chromatography (SiO<sub>2</sub>, CH<sub>2</sub>Cl<sub>2</sub>/EtOAc 9:1).
- From **12b**, a non-separable mixture of acetates **12c** and **20** was formed (60 % overall yield) in a 13:1 ratio according to the NMR spectrum. Purification of the mixture of compounds was performed by chromatography (SiO<sub>2</sub>, CH<sub>2</sub>Cl<sub>2</sub>/EtOAc 9:1).

#### Ring expansion of alcohols **9a-12a**

**Method B.** A solution of the appropriate alcohol derivative **9a – 12a** (0.16 mmol) in THF (1 mL) was treated with MsCl (0.19 mmol, 1.2 equiv) and Et<sub>3</sub>N (0.64 mmol, 4 equiv) under an argon atmosphere at – 20 °C for 1 h. AgOAc (0.48 mmol, 3 equiv) was added and the resulting mixture was warmed to rt over a period of 1 h. The reaction mixture was filtered through a bed of Celite and diluted with CH<sub>2</sub>Cl<sub>2</sub>. The organic layer was washed with a saturated aqueous NaHCO<sub>3</sub> solution (10 mL), dried and concentrated to afford the corresponding mixture of acetates.

**From 9a.** A mixture of acetates **9c** and **17** was obtained in a 1:2.2 ratio according the NMR spectrum in 78 % yield. Purification and separation of the compounds was performed by chromatography (SiO<sub>2</sub>, CH<sub>2</sub>Cl<sub>2</sub>/EtOAc 9:1). For analytical data of **9c** and **17**, see the main text and Tables 1 and 2.

**From 10a.** A mixture of acetates **10c** and **18** was obtained in a 1.1:1 ratio according the NMR spectrum in 66 % yield. Purification and separation of the compounds was performed by chromatography (SiO<sub>2</sub>, CH<sub>2</sub>Cl<sub>2</sub>/EtOAc 9:1).

**(2*S*,3*aS*,7*aS*)-1-Benzyl-2-[(1'*S*)-(1-acetoxyethyl)]octahydroindol-6-one ethylene acetal (10c):**

Colourless oil.  $R_f = 0.26$  (SiO<sub>2</sub>, CH<sub>2</sub>Cl<sub>2</sub>/EtOAc 9:1).  $[\alpha]_D^{20} - 57$  ( $c$  0.2, CHCl<sub>3</sub>); IR 1732 cm<sup>-1</sup>; <sup>1</sup>H NMR (400 MHz, CDCl<sub>3</sub>, gCOSY) 1.21 (d,  $J = 6.0$  Hz, 3H, CH<sub>3</sub>), 1.50 (t,  $J = 11.0$  Hz, 1H, H-5), 1.50-1.80 (m, 7H), 1.90 (s, 3H, OAc), 2.25 (m, 1H, H-3a), 2.85 (dt,  $J = 11.0, 6.4$  Hz, 1H, H-7a), 3.00 (dt,  $J = 10.0, 7.0$  Hz, 1H, H-2), 3.70 and 3.94 (2d,  $J = 14.0$  Hz, 1H each, NCH<sub>2</sub>Ar), 3.74-3.86 (m, 4H, OCH<sub>2</sub>), 4.91 (quint,  $J = 6.2$  Hz, 1H, H-1'), 7.20-7.35 (m, 5H, ArH); <sup>13</sup>C NMR (100 MHz, CDCl<sub>3</sub>), see Table 1. HRFABMS: calcd for C<sub>21</sub>H<sub>30</sub>NO<sub>4</sub> 360.2175 (MH<sup>+</sup>), found 360.2163.

**(2*R*,3*R*,4*aS*,8*aS*)-3-Acetoxy-1-benzyl-2-methyl-7-oxodecahydroquinoline ethylene acetal (18):**

Colourless oil.  $R_f = 0.58$  (SiO<sub>2</sub>, CH<sub>2</sub>Cl<sub>2</sub>/EtOAc 9:1).  $[\alpha]_D^{20} - 24$  ( $c$  1.0, CHCl<sub>3</sub>); IR 1733 cm<sup>-1</sup>; <sup>1</sup>H NMR (400 MHz, CDCl<sub>3</sub>, gCOSY) 1.10 (d,  $J = 7.0$  Hz, 3H, CH<sub>3</sub>), 1.48 (m, 1H, H-5), 1.52 (m, 1H, H-4), 1.59 (m, 2H, H-6), 1.72 (t,  $J = 12.4$  Hz, 1H, H-8ax), 1.80 (m, 1H, H-5), 1.87 (brt,  $J = 13.0$  Hz, 1H, H-4ax), 1.94 (dm,  $J = 12.4$  Hz, 1H, H-8eq), 2.00 (s, 3H, OAc), 2.08 (m, 1H, H-4a), 3.00 (dt,  $J = 12.8, 4.4$  Hz, 1H, H-8a), 3.20 (q,  $J = 6.5$  Hz, 1H, H-2); 3.78 and 3.84 (2d,  $J = 14.4$  Hz, 1H each, NCH<sub>2</sub>Ar), 3.86-3.95 (m, 4H, OCH<sub>2</sub>), 4.99 (ddd,  $J = 12.0, 5.6, 4.4$  Hz, 1H, H-3), 7.20-7.35 (m, 5H, ArH); <sup>13</sup>C NMR (100 MHz, CDCl<sub>3</sub>, gHSQC), see Table 2 HRFABMS: calcd for C<sub>21</sub>H<sub>30</sub>NO<sub>4</sub> 360.2175 (MH<sup>+</sup>), found 360.2171.

**From 11a.** **11c** and **19** were obtained in a 2.2:1 ratio according the NMR spectrum in 76 % yield as a unseparable mixture. Purification of the mixture of compounds was performed by chromatography (SiO<sub>2</sub>, CH<sub>2</sub>Cl<sub>2</sub>/EtOAc 9:1).

**(2*S*,3*aR*,7*aR*)-1-Benzyl-2-[(1'*S*)-(1-acetoxyethyl)]octahydroindol-6-one ethylene acetal (11c):**

Colourless oil.  $R_f = 0.31$  (SiO<sub>2</sub>, CH<sub>2</sub>Cl<sub>2</sub>); <sup>1</sup>H NMR (400 MHz, CDCl<sub>3</sub>, gCOSY) 1.23 (d,  $J = 6.4$  Hz, 3H, CH<sub>3</sub>), 1.35 (t,  $J = 12.4$  Hz, 1H, H-7ax), 1.45-2.05 (m, 7H), 2.07 (s, 3H, OAc), 2.25 (m, 1H, H-3a), 2.89 (dt,  $J = 10.0, 2.8$  Hz, 1H, H-2), 3.08 (dt,  $J = 12.0, 6.0$  Hz, 1H, H-7a), 3.52 and 3.88 (2d,  $J = 13.6$  Hz, 1H each, NCH<sub>2</sub>), 3.80-4.00 (m, 4H, OCH<sub>2</sub>), 5.14 (qd,  $J = 6.4, 2.4$  Hz, 1H, H-1'), 7.15-7.35 (m, 5H, ArH); <sup>13</sup>C NMR (100 MHz, CDCl<sub>3</sub>, gHSQC), see Table 1. HRFABMS: calcd for C<sub>21</sub>H<sub>30</sub>NO<sub>4</sub> 360.2175 (MH<sup>+</sup>), found 360.2158.

**(2*R*,3*R*,4*aR*,8*aR*)-3-Acetoxy-1-benzyl-2-methyl-7-oxodecahydroquinoline ethylene acetal**

**(19):** Colourless oil.  $R_f$  = 0.31 (SiO<sub>2</sub>, CH<sub>2</sub>Cl<sub>2</sub>); <sup>1</sup>H NMR (400 MHz, CDCl<sub>3</sub>) 1.04 (d,  $J$  = 7.2 Hz, 3H, CH<sub>3</sub>), 1.45-2.05 (m, 8H), 2.07 (s, 3H, OAc), 2.34 (m, 1H, H-4a), 2.89 (qd,  $J$  = 7.2, 1.2 Hz, 1H, H-2ax), 3.09 (dt,  $J$  = 11.5, 4.4 Hz, 1H, H-8a), 3.68-3.80 (m, 6H, NCH<sub>2</sub>Ar and OCH<sub>2</sub>), 4.82 (q,  $J$  = 2.8 Hz, 1H, H-3eq), 7.15-7.30 (m, 5H, ArH); <sup>13</sup>C NMR (100 MHz, CDCl<sub>3</sub>), see Table 2. HRFABMS: calcd for C<sub>21</sub>H<sub>30</sub>NO<sub>4</sub> 360.2175 (MH<sup>+</sup>), found 360.2158.

**From 12a.** Acetate **12c** and traces of **20** were formed in a 13:1 ratio, according the NMR spectrum and GC-MS analysis, in 40% yield as a unseparable mixture. Purification of the mixture of compounds was performed by chromatography (SiO<sub>2</sub>, CH<sub>2</sub>Cl<sub>2</sub>/EtOAc 9:1).

**(2*S*,3*aR*,7*aR*)-1-Benzyl-2-[(1'*R*)-(1-acetoxyethyl)]octahydroindol-6-one ethylene acetal (12c):**

White Solid.  $R_f$  = 0.31 (SiO<sub>2</sub>, CH<sub>2</sub>Cl<sub>2</sub>); <sup>1</sup>H NMR (400 MHz, CDCl<sub>3</sub>, gCOSY) 1.24 (d,  $J$  = 6.4 Hz, 3H, CH<sub>3</sub>), 1.37 (t,  $J$  = 12.0 Hz, 1H, H-7ax), 1.49 (dm,  $J$  = 12.0 Hz, 1H, H-5eq), 1.60-1.70 (m, 3H, H-5 and H-4), 1.75 (m, 1H, H-3), 1.80-1.90 (m, 2H, H-3 and H-7eq), 1.96 (s, 3H, OAc), 2.28 (m, 1H, H-3a), 3.05 (ddd,  $J$  = 8.8, 6.4, 2.8 Hz, 1H, H-2), 3.15 (ddd,  $J$  = 11.2, 5.6, 5.6 Hz, 1H, H-7a), 3.69 and 3.88 (2d,  $J$  = 14.4 Hz, 1H each, NCH<sub>2</sub>Ar), 3.73-3.90 (m, 4H, OCH<sub>2</sub>), 4.95 (quint,  $J$  = 6.4 Hz, 1H, H-1'), 7.20-7.35 (m, 5H, ArH); <sup>13</sup>C NMR (100 MHz, CDCl<sub>3</sub>), see Table 1. HRFABMS: calcd for C<sub>21</sub>H<sub>30</sub>NO<sub>4</sub> 360.2175 (MH<sup>+</sup>), found 360.2163.

**Ring expansion of octahydroindole 9a using silver trifluoroacetate.** A solution of alcohol **9a** (62 mg, 0.2 mmol) in THF (1.4 mL) was treated with MsCl (0.019 mL, 0.24 mmol, 1.2 equiv) and Et<sub>3</sub>N (0.11 mL, 0.8 mmol, 4 equiv) under argon atmosphere at – 20 °C for 1 h. CF<sub>3</sub>CO<sub>2</sub>Ag was added (221 mg, 1 mmol, 5 equiv) and the resulting mixture was warmed to room temperature over a period of 1 h. The mixture was treated with 2.5 N NaOH (1 mL) and stirred for 3 h. The reaction mixture was filtered through a bed of Celite and diluted with CH<sub>2</sub>Cl<sub>2</sub>. The organic layer was dried and concentrated to afford a mixture of **9a** and **21**, which was purified by chromatography (Al<sub>2</sub>O<sub>3</sub>, hexane/EtOAc 9:1) to give 16 mg (26%) of **9a** and 36 mg (58%) of (2*S*,3*R*,4*aS*,8*aS*)-1-Benzyl-3-hydroxy-2-methyl-7-oxodecahydroquinoline ethylene acetal (**21**): Colourless oil.  $R_f$  = 0.10 (Al<sub>2</sub>O<sub>3</sub>, Hexane/EtOAc 8:2).  $[\alpha]_D^{20}$  +1.5 ( $c$  0.6, CHCl<sub>3</sub>); <sup>1</sup>H NMR (300 MHz, CDCl<sub>3</sub>, COSY) 1.17 (d,  $J$  =

6.0 Hz, 3H, CH<sub>3</sub>), 1.43-1.49 (m, 2H, H-5 and H-6), 1.55-1.74 (m, 5H, H-4, H-5, H-6, and H-8eq), 1.88 (t,  $J = 12.6$  Hz, 1H, H-8ax), 2.04 (m, 1H, H-4a), 2.57 (dq,  $J = 9.0, 6.0$  Hz, 1H, H-2ax), 2.93 (dt,  $J = 12.6, 4.5$  Hz, 1H, H-8a), 3.36 (td,  $J = 9.0, 7.2$  Hz, 1H, H-3ax), 3.57 and 3.90 (2d,  $J = 14.4$  Hz each, NCH<sub>2</sub>Ar), 3.79-3.94 (m, 4H, OCH<sub>2</sub>), 7.18-7.35 (m, 5H, ArH); <sup>13</sup>C NMR (75 MHz, CDCl<sub>3</sub>, gHSQC), see Table 2. HRFABMS: calcd for C<sub>19</sub>H<sub>28</sub>NO<sub>3</sub> 318.2069 (MH<sup>+</sup>), found 318.2064.

H1 / s2pul / Mercury-400\_qui  
 cdcl3/Temp: 25C /N reg: M40006-120106181152  
 Usuari: san / Mostra: msc464p  
 Nom: MARISA MENA CERVIGON  
 Data:13/01/06 / Sist automatic  
 Pulse Sequence: s2pul

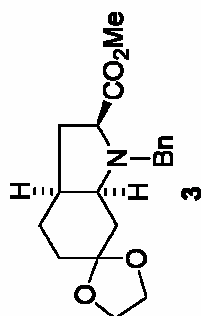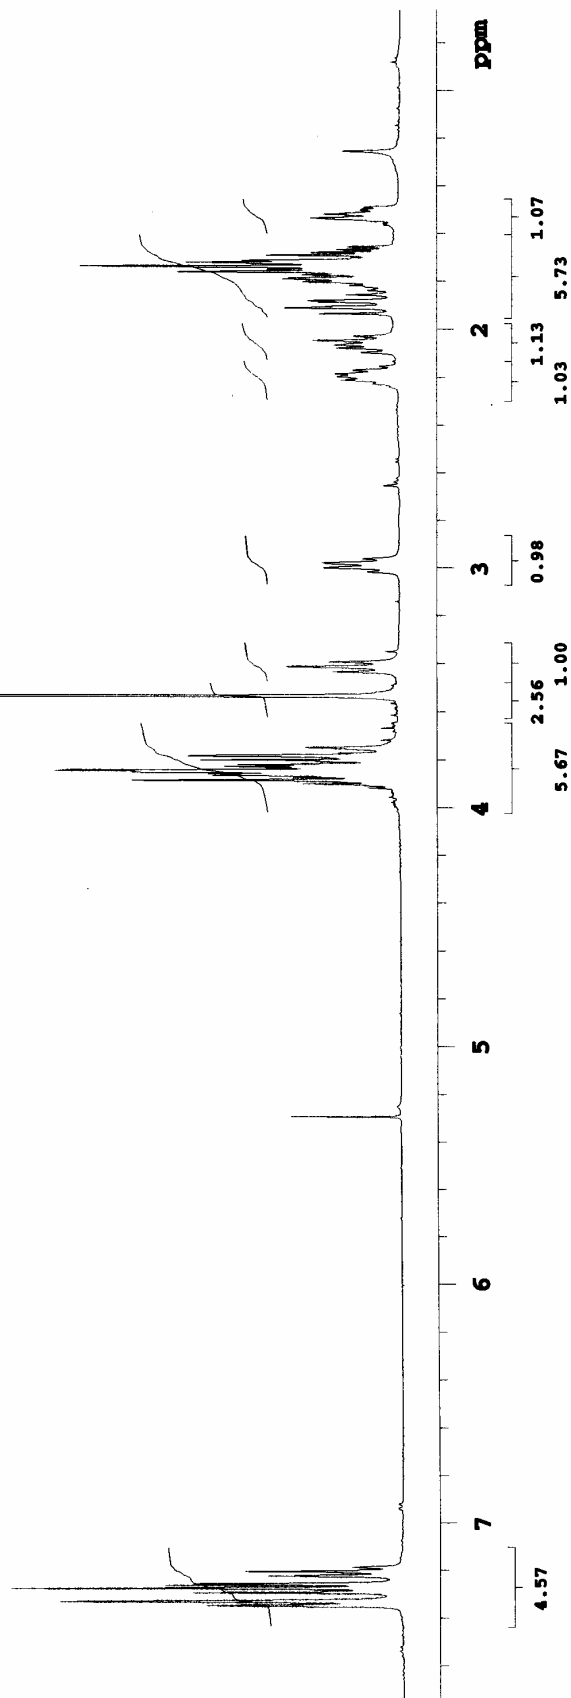

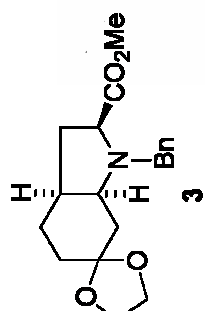

C13 / s2pu1 / Gemini-300A  
 Date: 27/05/04 / Sist automatic

USUARI: MARISSA MENA CERVIGNON  
 Nom: MARISSA MENA CERVIGNON

Pulse Sequence: s2pu1

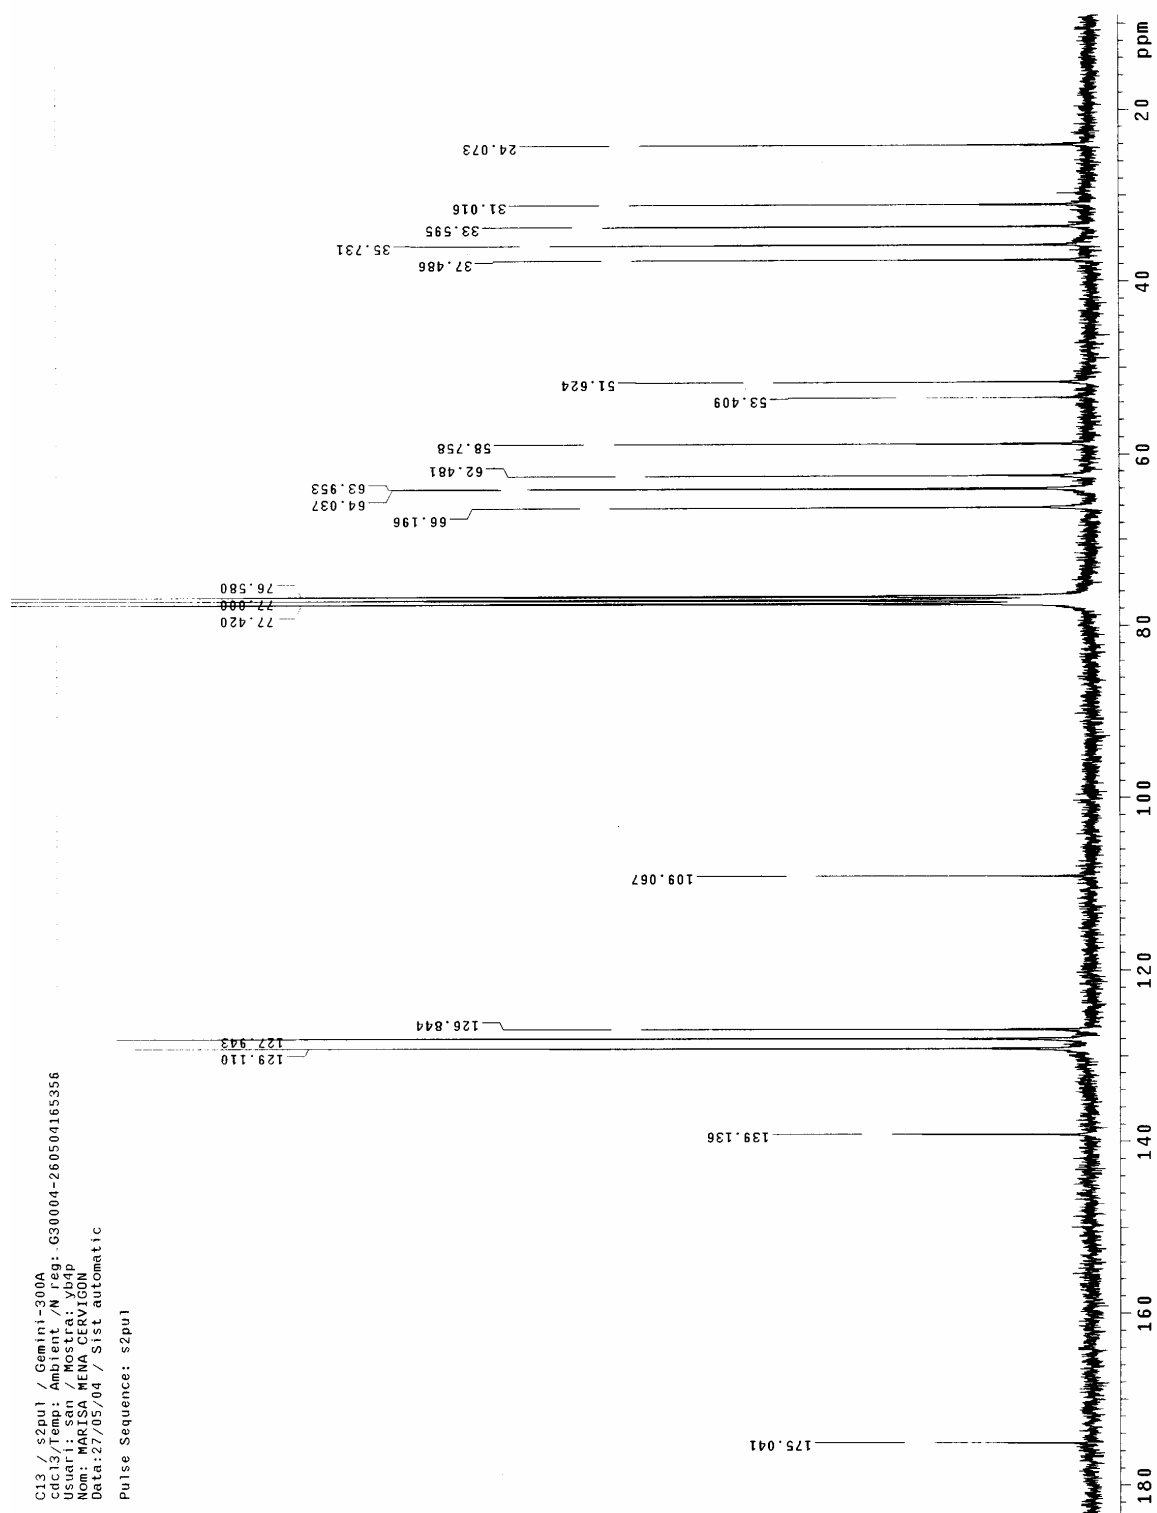



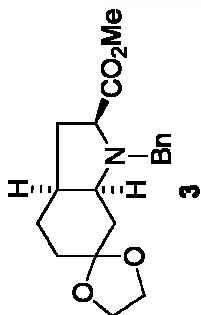

H1 / gCOSY / Mercury-400\_qui  
cdcl3/Temp: 25C / N reg: M40006-120106181  
152

Usuari: san / Mostra: mmc464p  
Nom: MARISA MENA CERVIGON  
Data:13/01/06 / Sist automatic

exp2 gCOSY

| SAMPLE                         | FLAGS |
|--------------------------------|-------|
| date Jan 13 2006 hs mn         |       |
| solvent cdcl3 sspul n          |       |
| sample auto_Custom~ hsgl1 1004 |       |
| Q_13Jan2006 SPECIAL            |       |
| ACQUISITION temp 25.0          |       |
| sw 6410.3 gain 22              |       |
| at 0.150 spin 0                |       |
| np 1924 F2 PROCESSING          |       |
| fb not used sb -0.075          |       |
| ss 16 sbs not used             |       |
| dl 1.000 fn 2048               |       |
| nt 2 F1 PROCESSING             |       |
| 2D ACQUISITION sb1 -0.040      |       |
| sw1 6410.3 sbs1 not used       |       |
| ni 256 proc1 lp                |       |
| PRESATURATION fn1 2048         |       |
| satmode n DISPLAY              |       |
| satfrq 0 sp 15.7               |       |
| satdly 0 wp 1836.0             |       |
| satpwr 0 sp1 272.6             |       |
| TRANSMITTER wp1 1384.8         |       |
| tn H1 xfl 798.9                |       |
| sfrq 400.114 xfp 0             |       |
| tof 381.9 xfl1 798.9           |       |
| tpwr 58 xfp1 0                 |       |
| pw 12.200 PLOT                 |       |
| GRADIENTS wc 131.8             |       |
| gzl1 1004 sc 6.2               |       |
| gt1 0.001000 wc2 131.8         |       |
| gstab 0.000500 sc2 0           |       |
| DECOUPLER vs 474               |       |
| dn C13 th 5                    |       |
| dm nnn ai cdc av               |       |

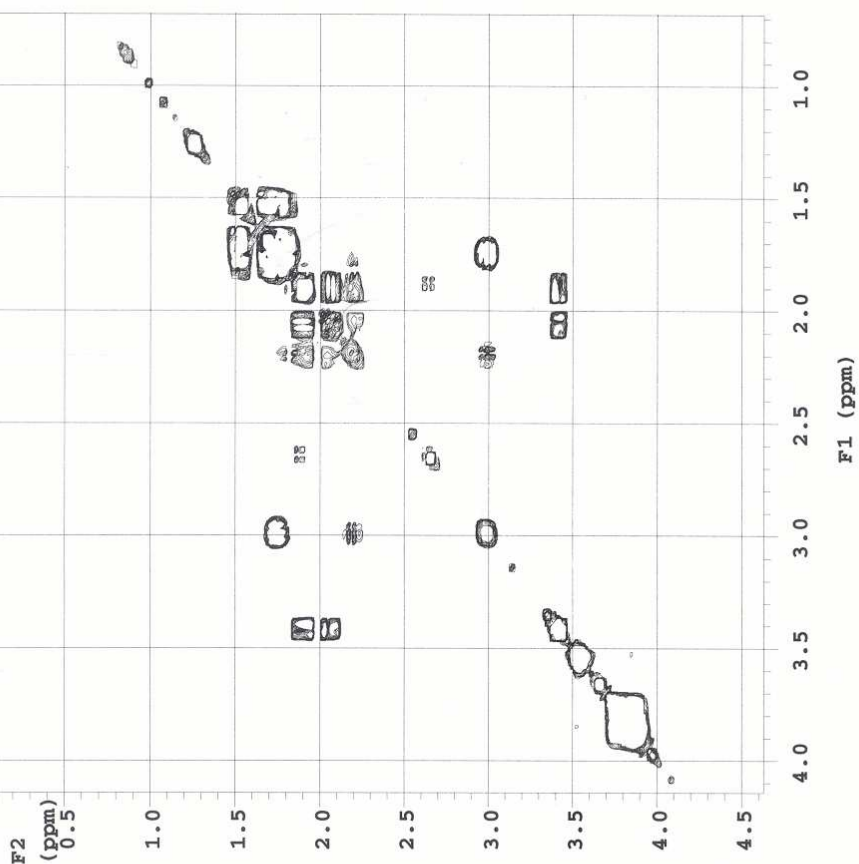

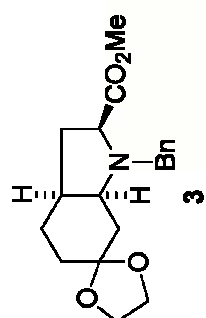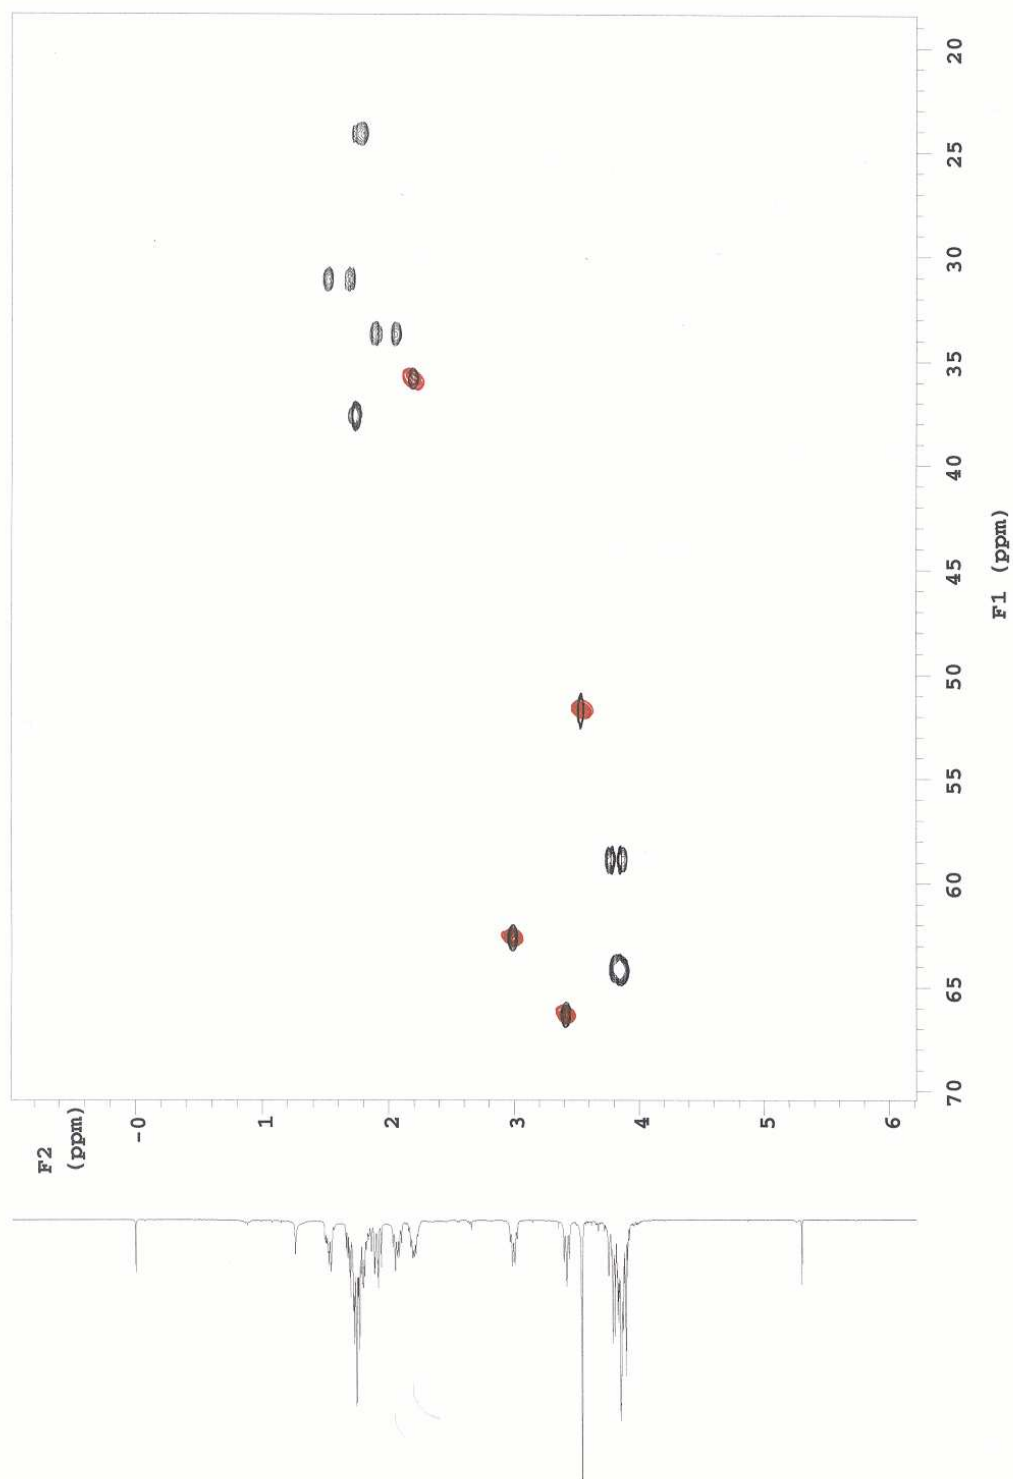

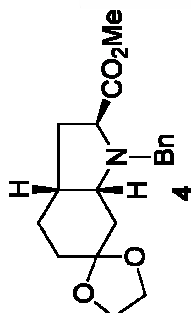

UNITAT DE RMN D'ALT CAMP  
SERVIS D'ANALITICA I TECNICS  
UNIVERSITAT DE BARCELONA  
\*\*\*\*\*@\*\*\*\*\*

H1 / s2pu1 / Gemini-300A  
cdcl3/Temp: Ambient / N reg: G30004-260504165044  
Usuari: san / Mostra: ybip  
Nom: MARISSA MENA CERVIGON  
Data:26/05/04 / Sist automatic

\*\*\*\*\*

Pulse Sequence: s2pu1

Solvent: cdcl3  
Ambient temperature  
Sample #2 User san  
File: 0206  
GEMINI-300 "zape"

Relax. delay 1.000 sec  
Pulse 45.0 degrees  
Acq time 1.396 sec  
Width 4800.7 Hz  
32 repetitions  
OBSERVE H1, 300.045 MHz  
DATA PROCESSING  
Resol. enhancement -0.0 Hz  
FT size 32768  
\*\*\*\*\*

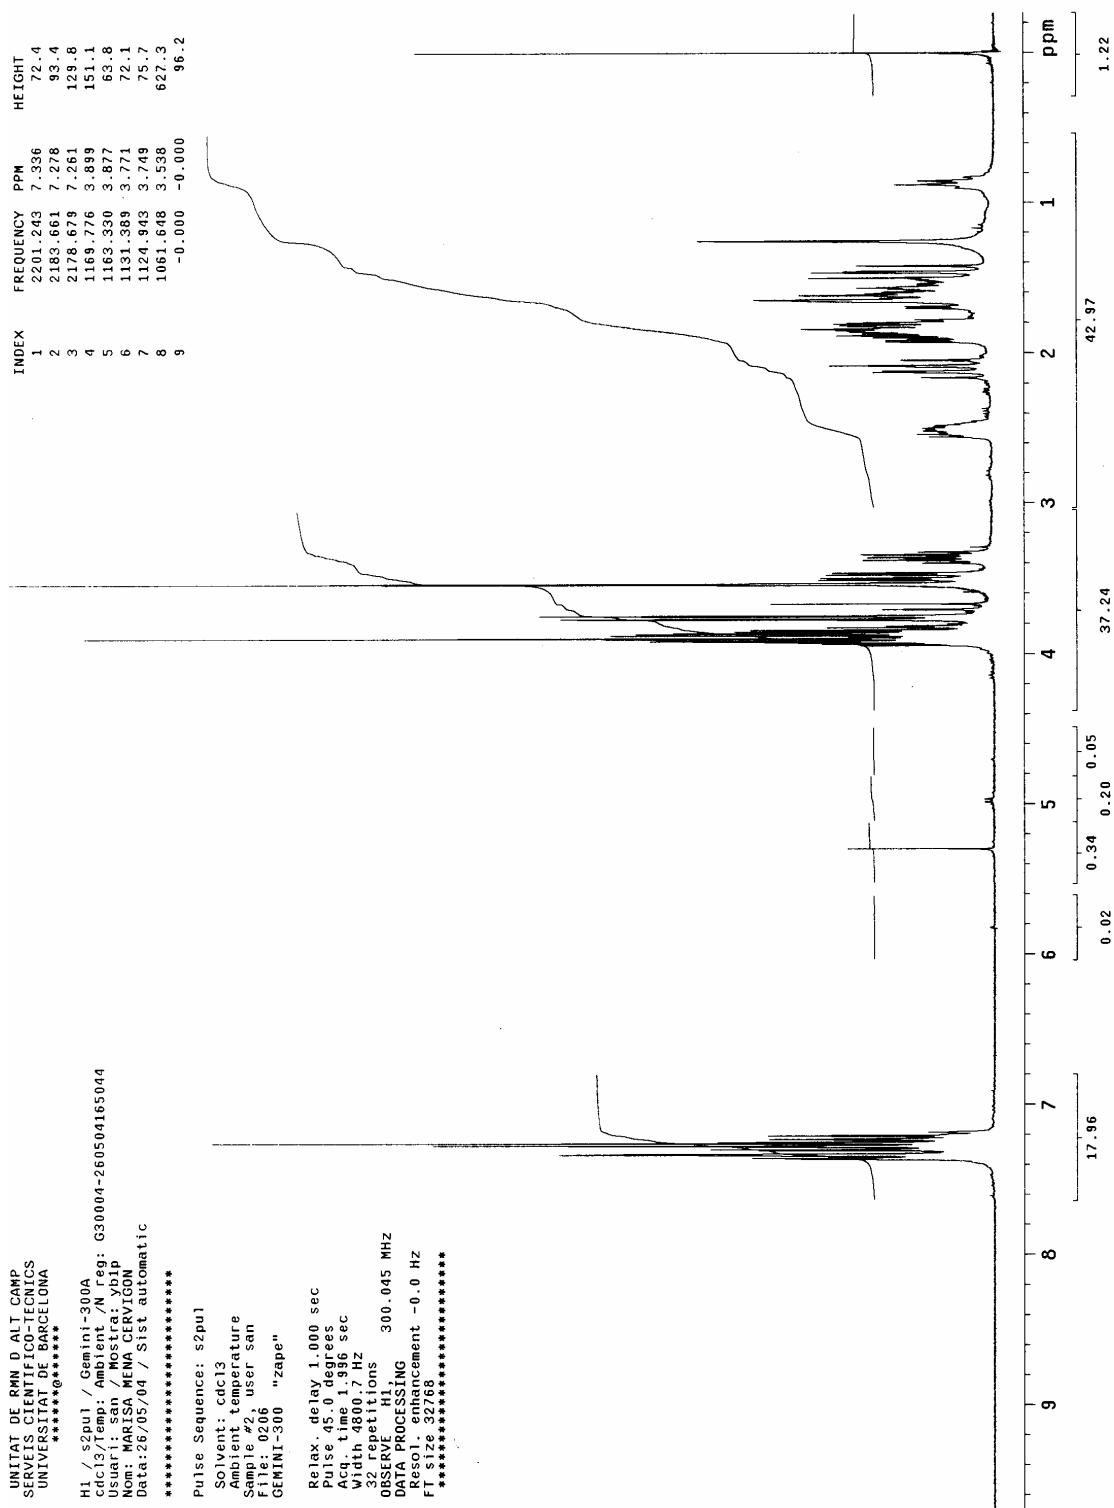

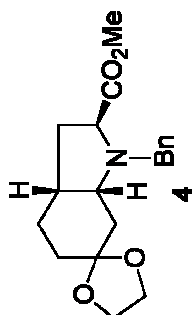

C13 / s2pu1 / Gemini-300A  
 cdcl3 / Temp: Ambient / N1 eg: G300004-260504165044  
 User: J. Smith / N1 eg: G300004-260504165044  
 Nom: MARISA MENA CERVIGON  
 Data: 27/05/04 / Syst automatic  
 Pulse Sequence: s2pu1

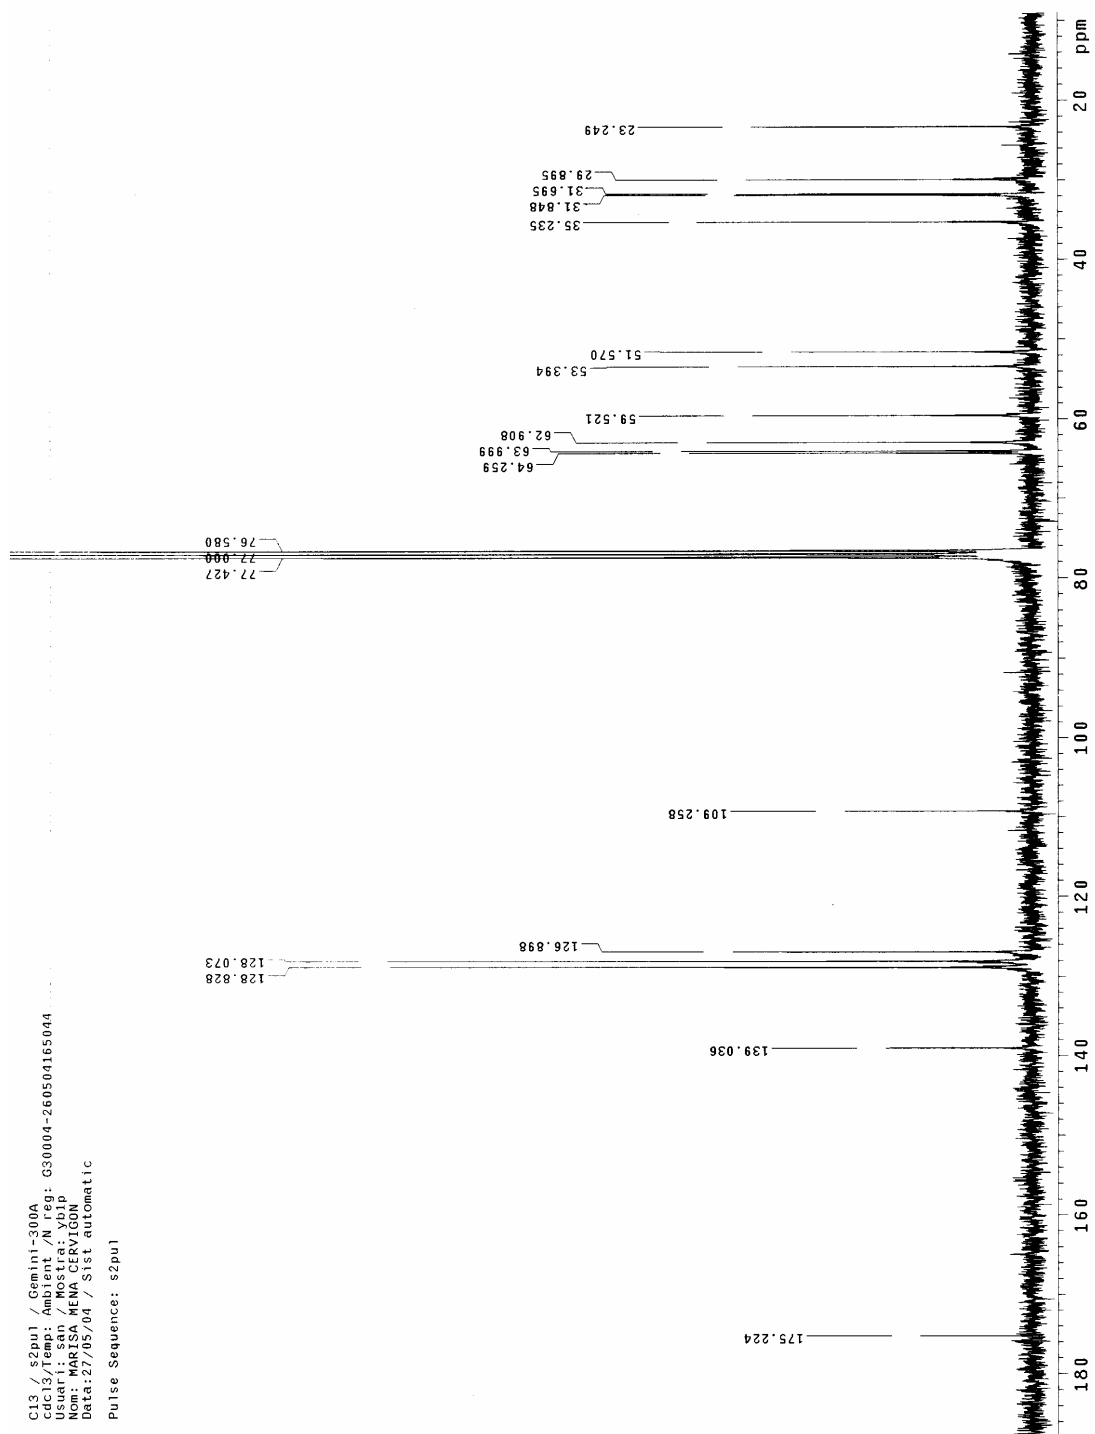

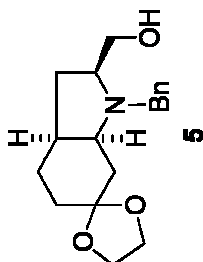

UNITAT DE RMN D'ALT CAMP  
SERVEIS CIENTÍFICO-TÈCNICS  
UNIVERSITAT DE BARCELONA  
\*\*\*\*\*@\*\*\*\*\*

H1 / s2pul / Mercury-400  
cdc13/Temp: 25C / N Reg: M40004-020604165813

Usuari: san / Host: cdc13p  
Data: 02/08/04 / Sist automatic  
Data: 02/08/04 / Sist automatic

\*\*\*\*\*@\*\*\*\*\*

Pulse Sequence: s2pul

Solvent: cdc13  
Temp: 25.0 C / 298.1 K  
Sample #6, user san  
File: 0606  
Mercury-400088 "bast"

Relax. delay 1.000 sec  
Pulse 45.0 degrees  
Acq. time 3.498 sec  
Width 3035.2 Hz  
Sensitivity 8.00000000  
OBSERVE H1 400.123 MHZ  
DATA PROCESSING  
Line broadening 0.3 Hz  
FT size 65536  
Total time 4 min, 38 sec

| INDEX | FREQUENCY | PPM   | HEIGHT |
|-------|-----------|-------|--------|
| 1     | 2929.392  | 7.323 | 253.2  |
| 2     | 2927.394  | 7.318 | 127.2  |
| 3     | 2923.692  | 7.307 | 149.4  |
| 4     | 2906.173  | 7.263 | 115.0  |
| 5     | 2119.238  | 5.296 | 90.0   |
| 6     | 1542.829  | 3.856 | 96.8   |
| 7     | 1541.292  | 3.852 | 90.2   |
| 8     | 1534.070  | 3.834 | 134.5  |
| 9     | 1511.020  | 3.776 | 113.1  |
| 10    | 0.000     | 0.000 | 97.0   |

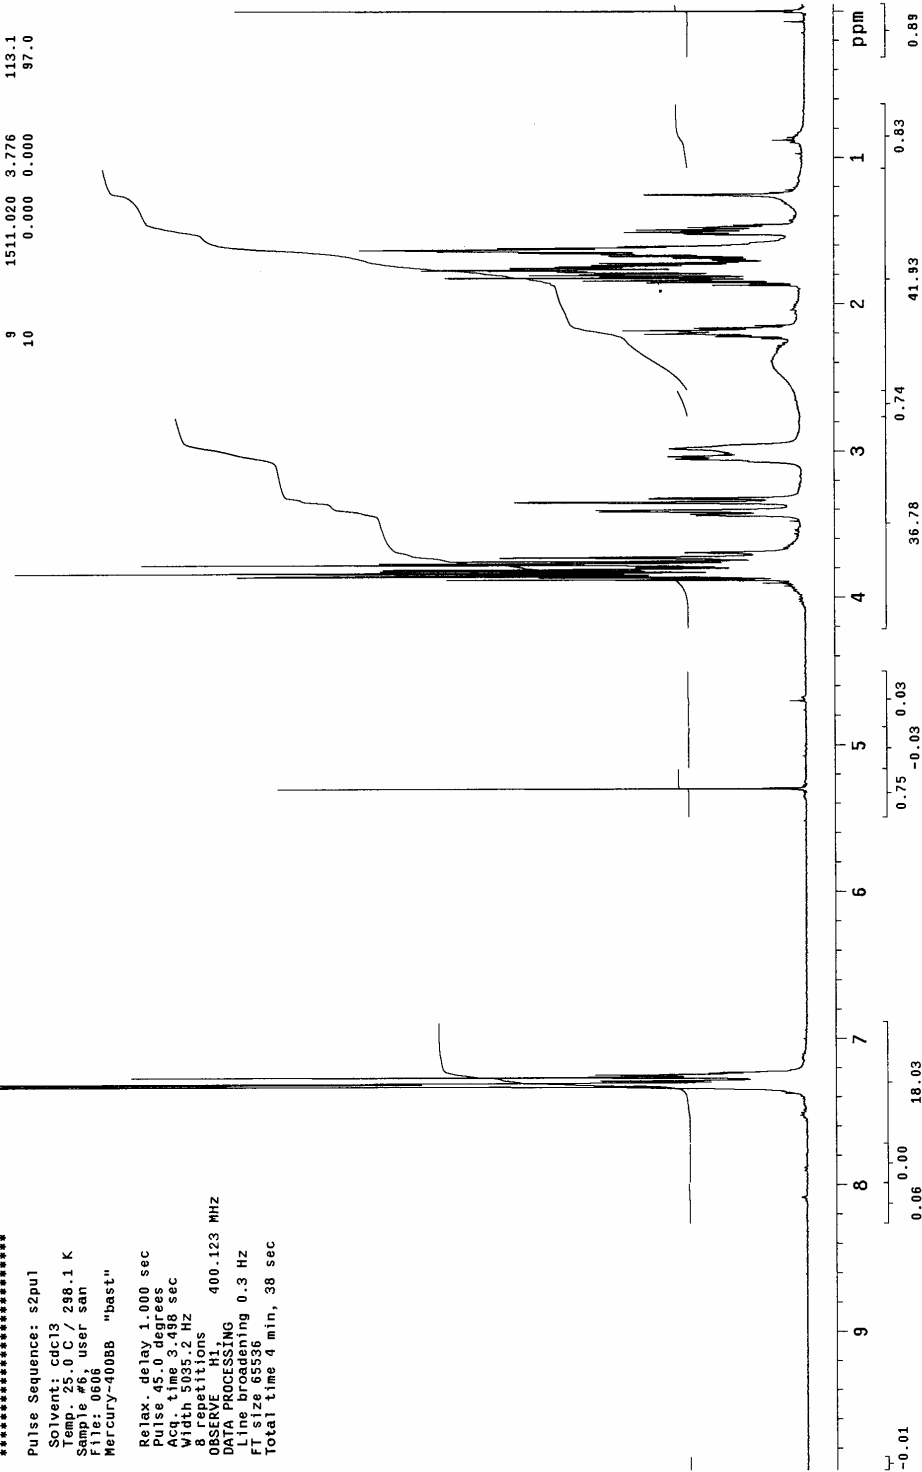

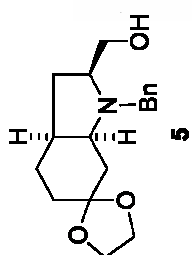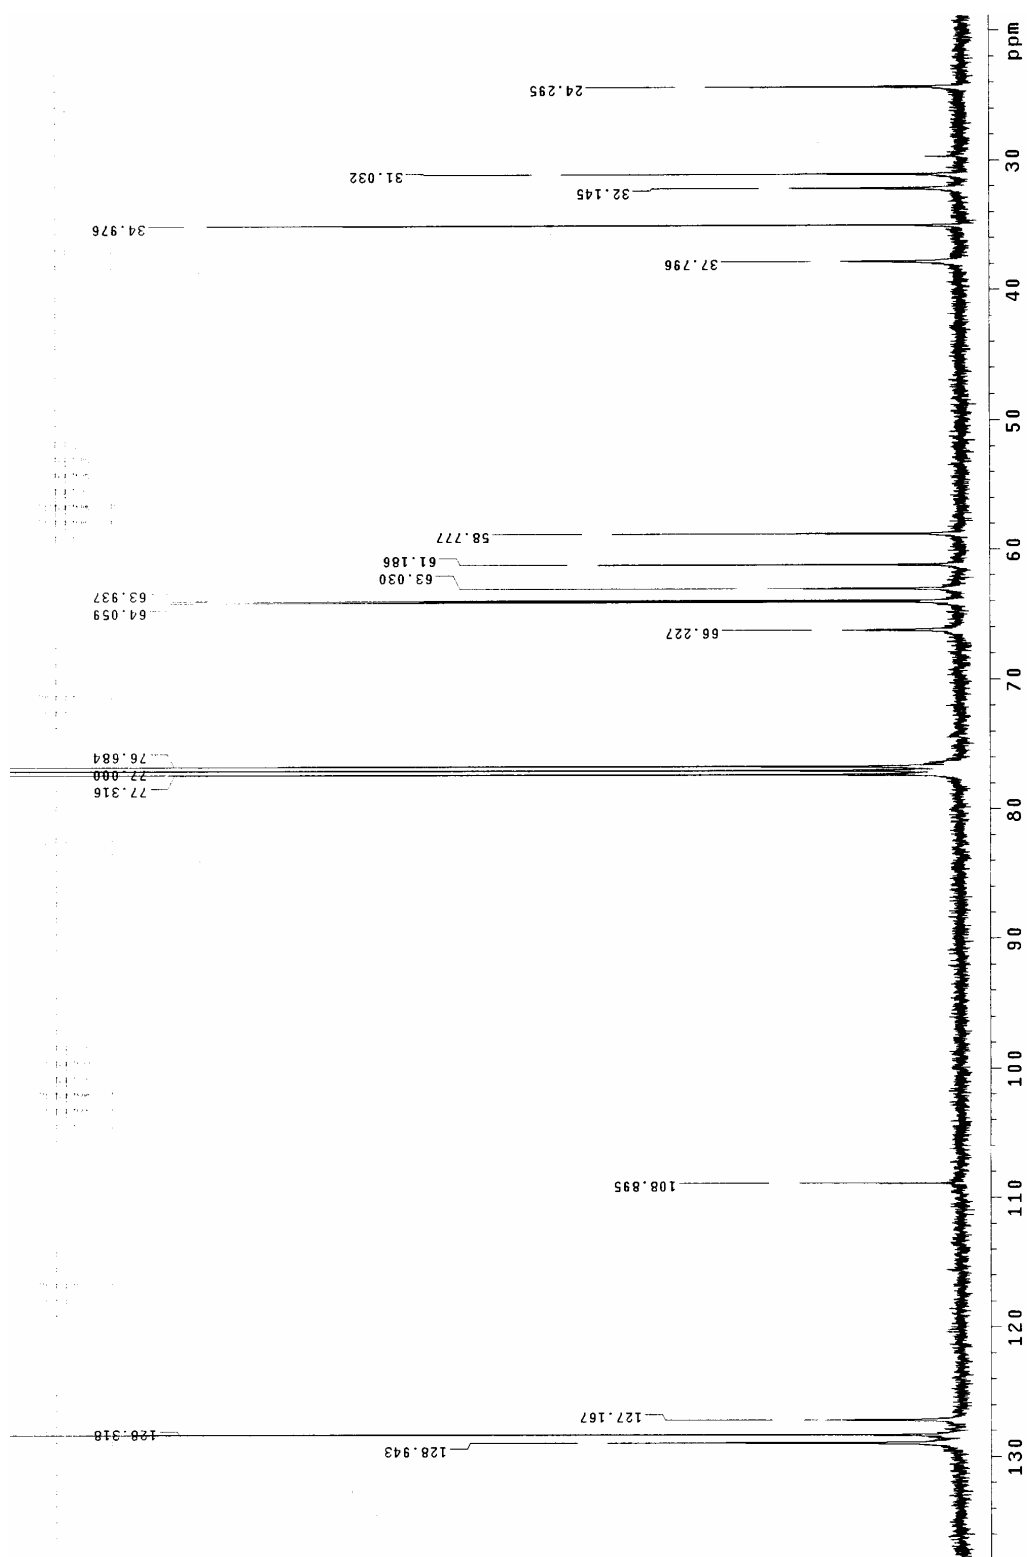



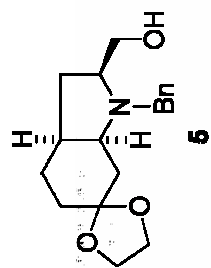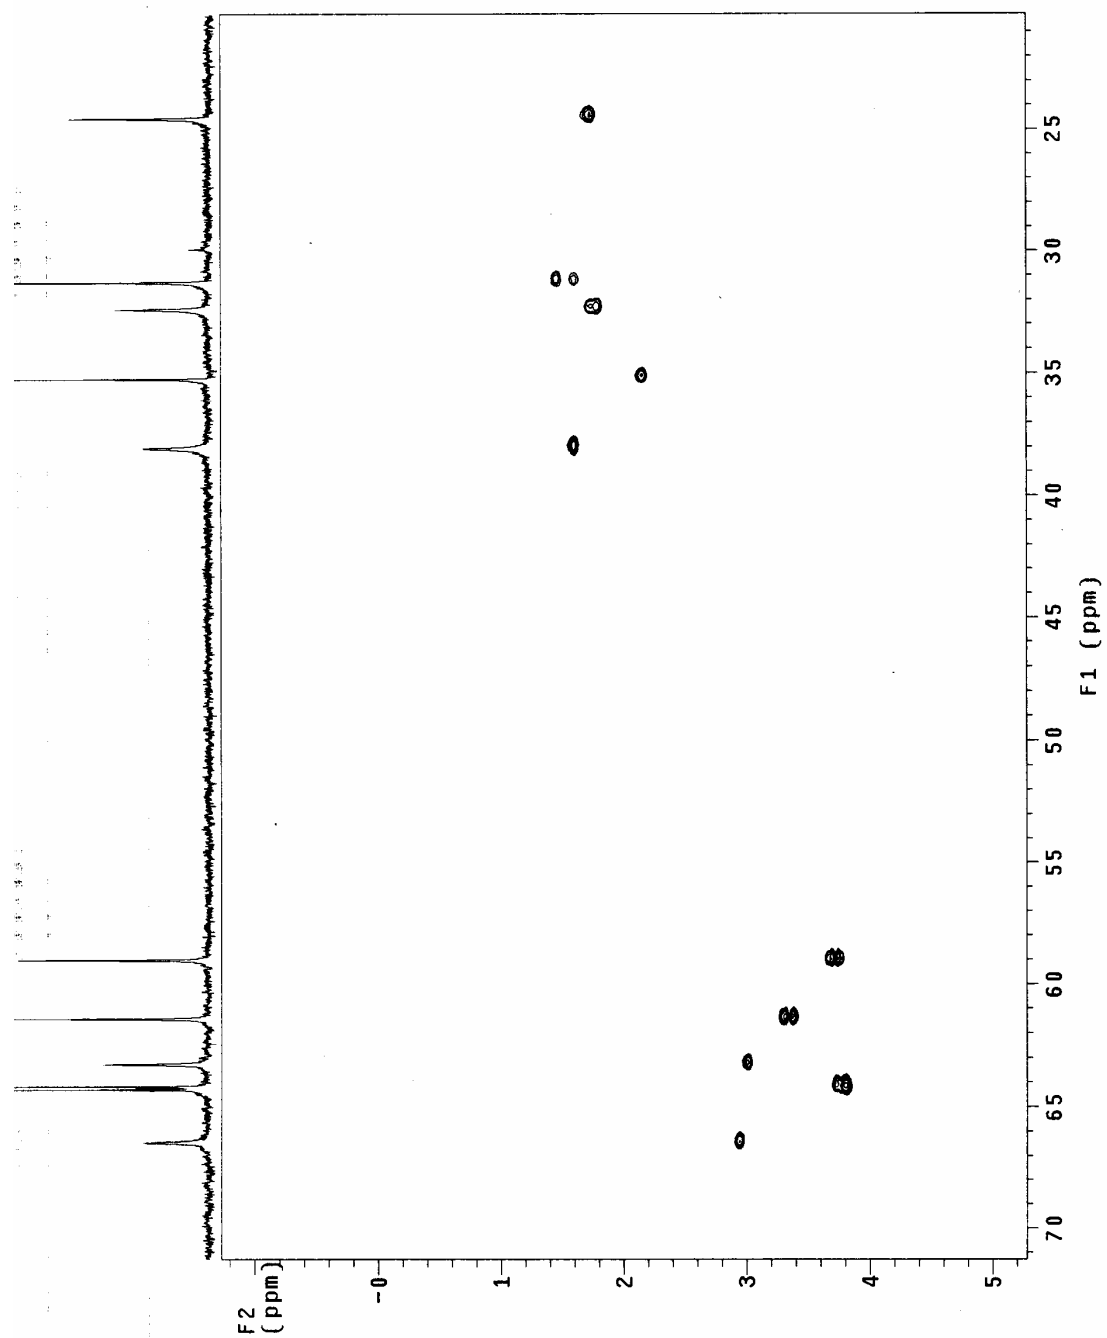



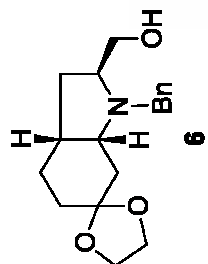

H1 / s2pul / Mercury-400  
 Cdc13/epa: 25C / N Te95 M40004-010404155212  
 Usuar1: san / Mostra: y22f  
 Nom: MARISA MENA CERVIGNO  
 Data: 01/04/04 / Sist automatic  
 Pulse Sequence: s2pul

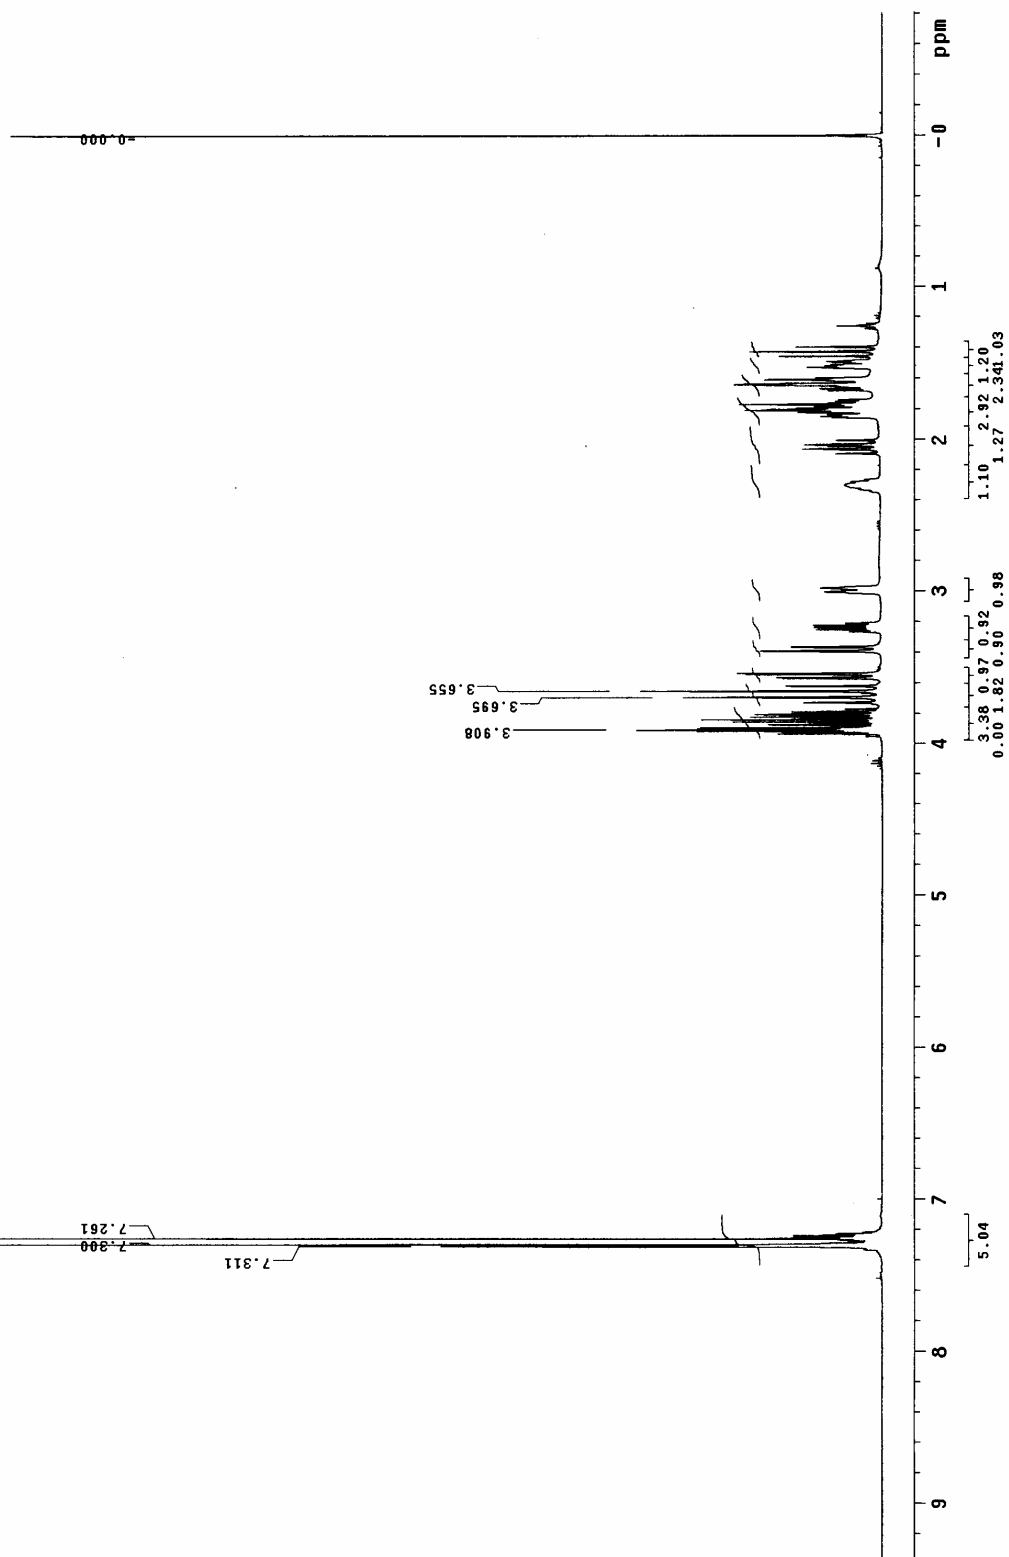

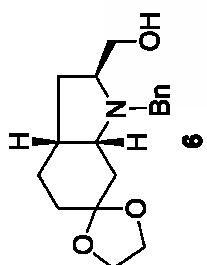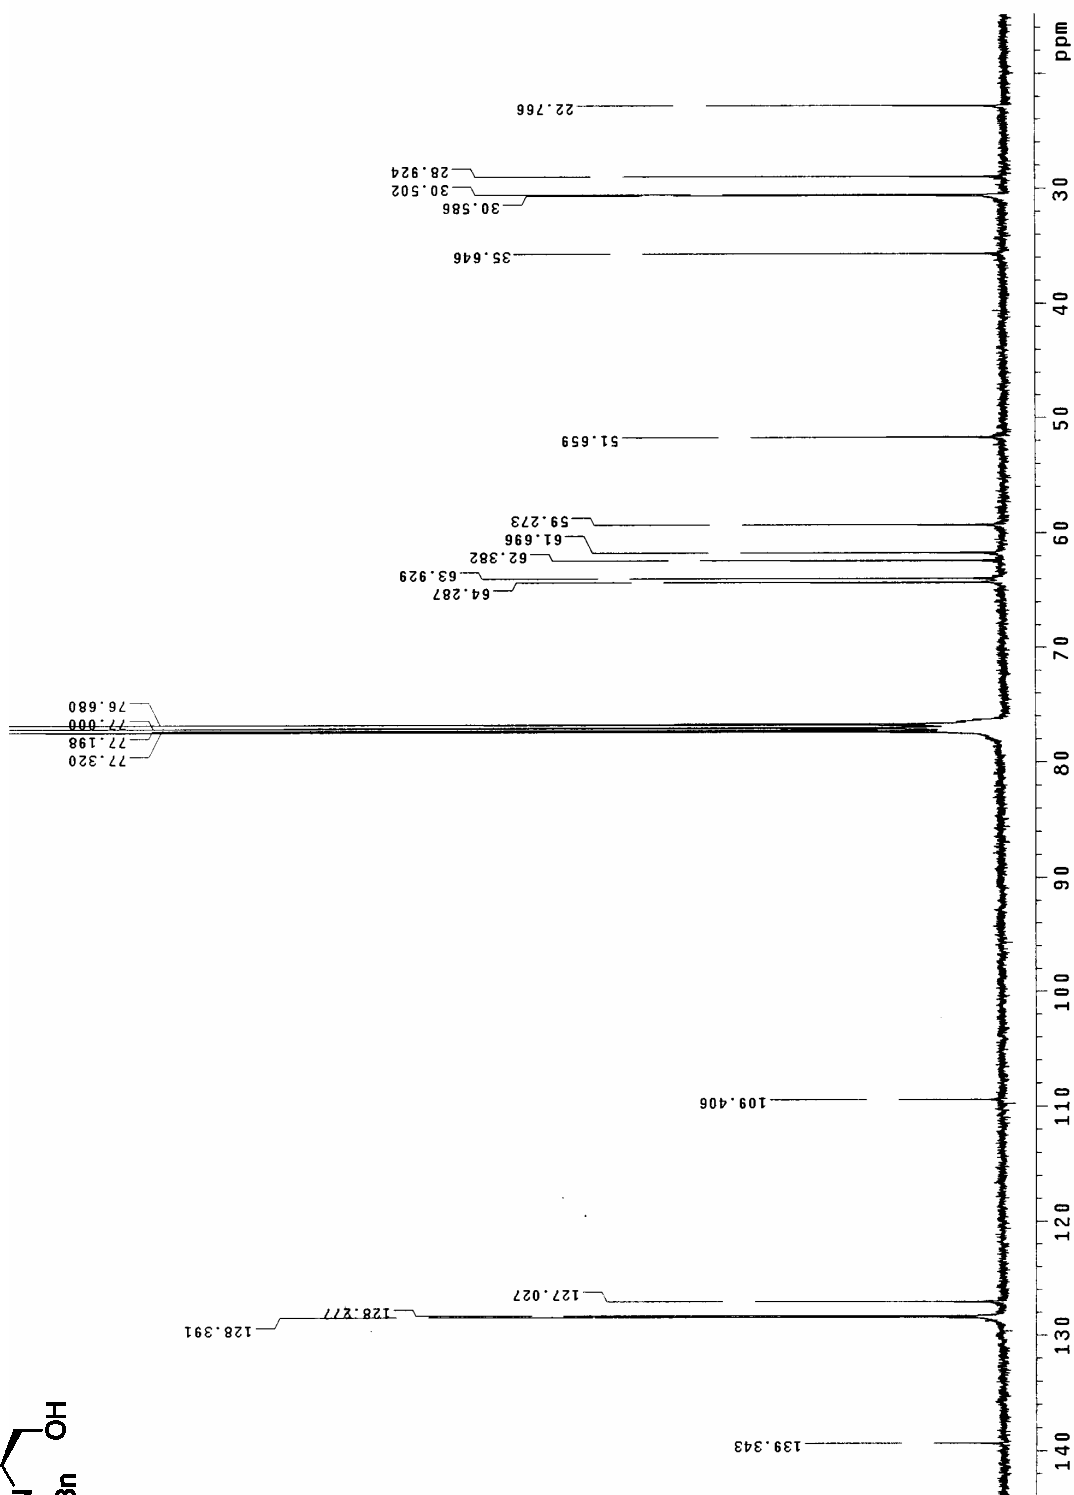

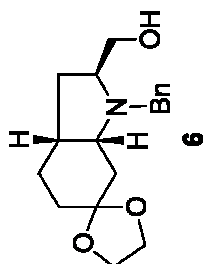

H1 / gCOSY / Mercury-400  
 212 / temp: 23C / N Reg: M40004-010404165  
 Usuari: san / Mostra: Vb2f  
 Nom: MARISA MENA CERVIGON  
 Data: 02/04/04 / Sist automatic

exp3 gCOSY

| SAMPLE         |                     | FLAGS |            |
|----------------|---------------------|-------|------------|
| date           | 2-2004              | hs    | nn         |
| solvent        | cdc13               | sspu1 |            |
| sample         | auto_01Apr2~ hsg1v1 |       | 1005       |
| 004-21:33:29   | SPECIAL             |       | 25.0       |
| ACQUISITION    |                     |       |            |
| sw             | 3876.0              | gain  | 28         |
| at             | 0.122               | sb    | 0          |
| fp             | 1022                | f2    | PROCESSING |
| ss             | not used            | sb    | -0.066     |
| d1             | 16                  | sbs   | not used   |
| nt             | 1.000               | fn    | 2048       |
| 2D ACQUISITION |                     |       |            |
| sw1            | 3876.0              | sb1   | -0.066     |
| ni             | 256                 | sbs1  | not used   |
| tn             | TRANSMITTER         | h1    | DISPLAY    |
| tn             | 400.124             | sp    | -86.7      |
| sfreq          | -528.6              | wp    | 1947.5     |
| tpwr           | 58                  | sp1   | 413.4      |
| pw             | 12.400              | wp1   | 1360.2     |
| g21v11         | 1005                | rfp   | 465.6      |
| g21v11         | 0.000500            | rfp1  | 465.6      |
| gstab          | 0.000500            | rfp1  |            |
| DECOUPLER      |                     |       |            |
| dn             | C13                 | wc    | 153.0      |
| dm             | nnn                 | sc    | 6.2        |
|                |                     | wc2   | 153.0      |
|                |                     | sc2   | 0          |
|                |                     | vs    | 282        |
|                |                     | vn    | 3          |
|                |                     | at    | cdc av     |

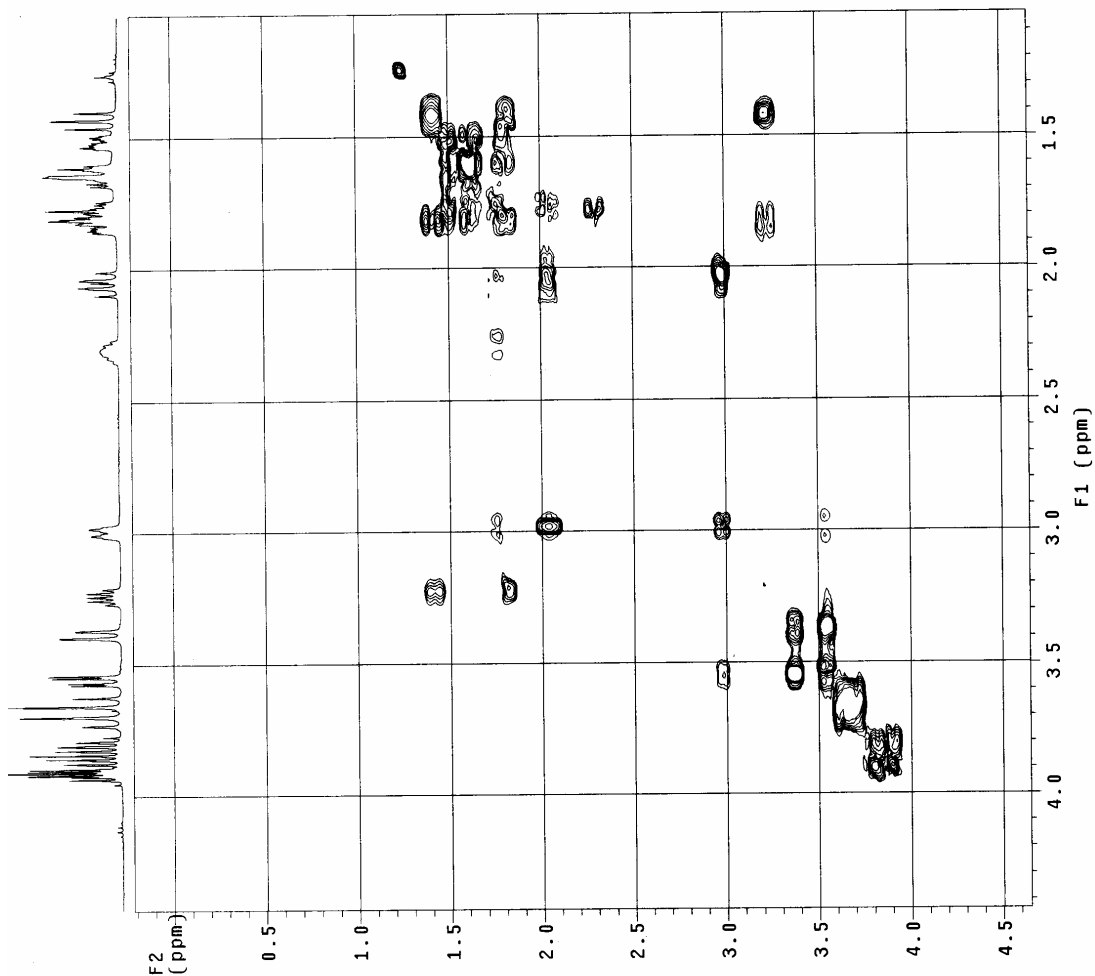

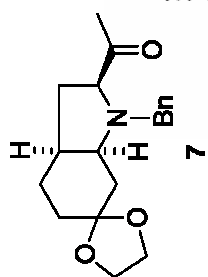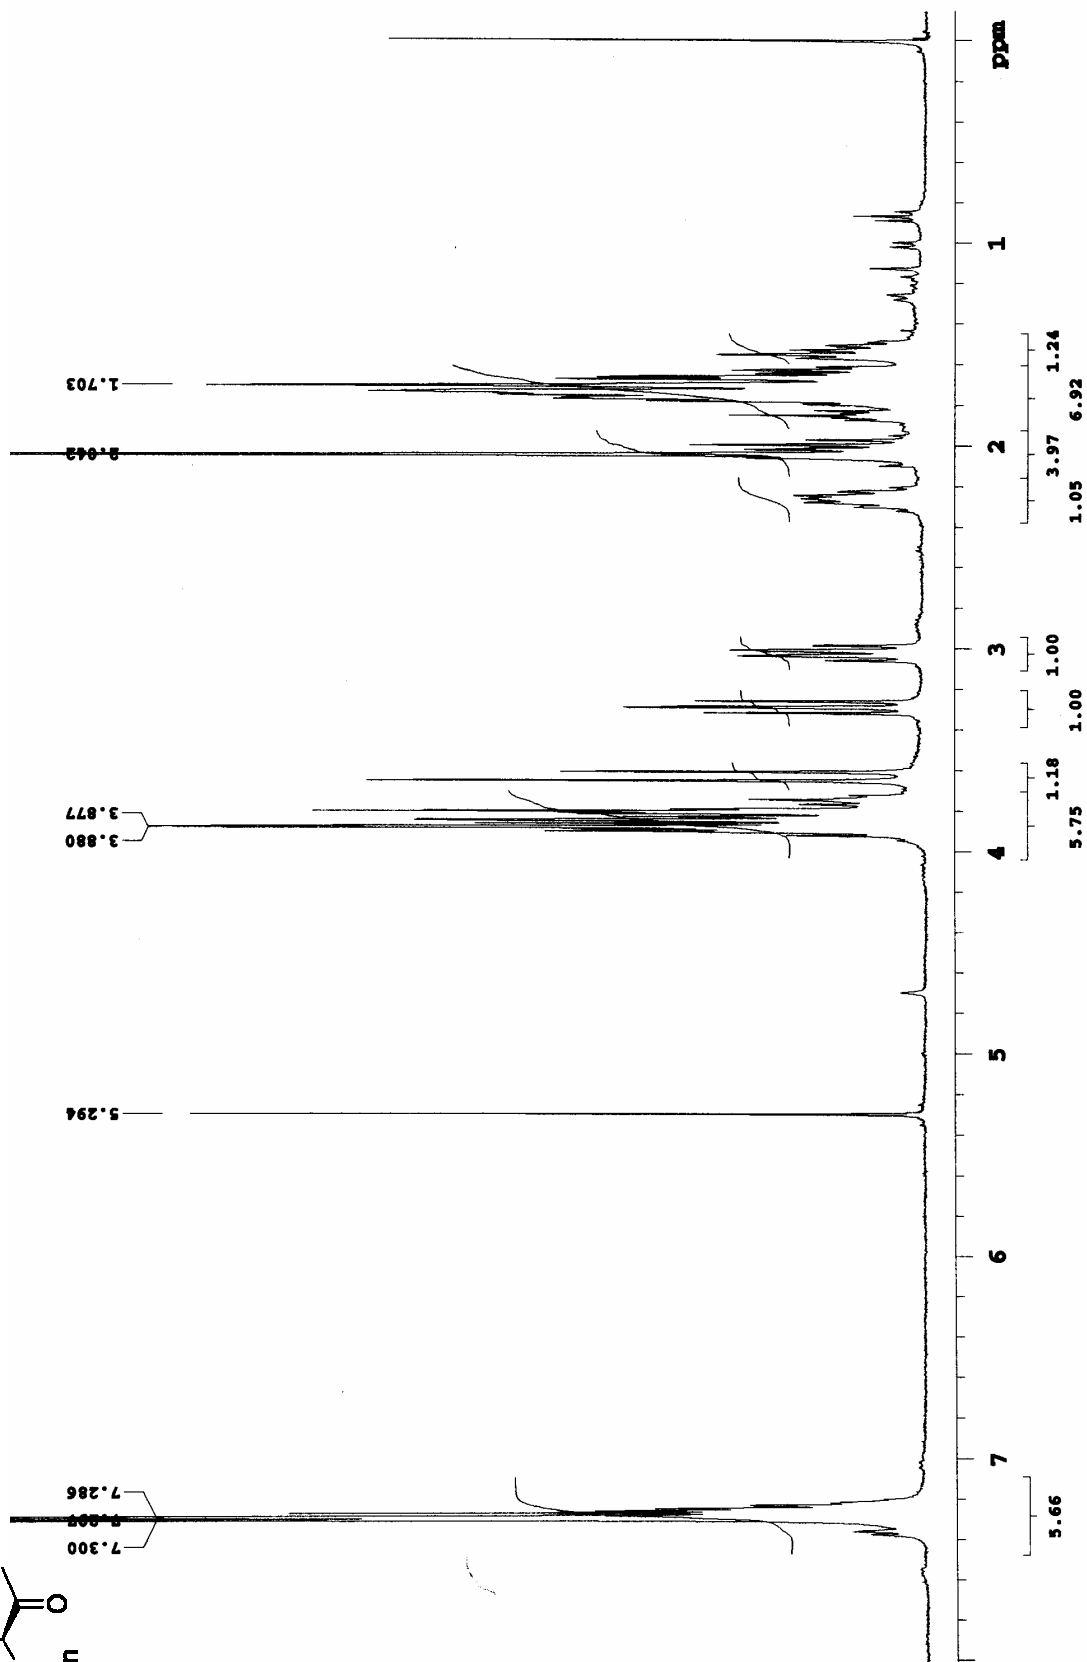

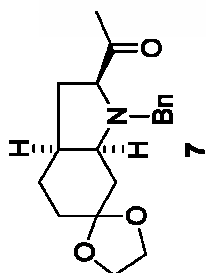

C13 / s2pul / Gem-200.D1VIV  
 LOC: # 4 / Disolvent: cdcl3 / temp ambient  
 Usuari: san/ Mostra: mmc468c  
 Nom: MARIJA MENA CERVIGON  
 Data: 06/04/05 / Sistema automatic  
 Pulse Sequence: s2pul

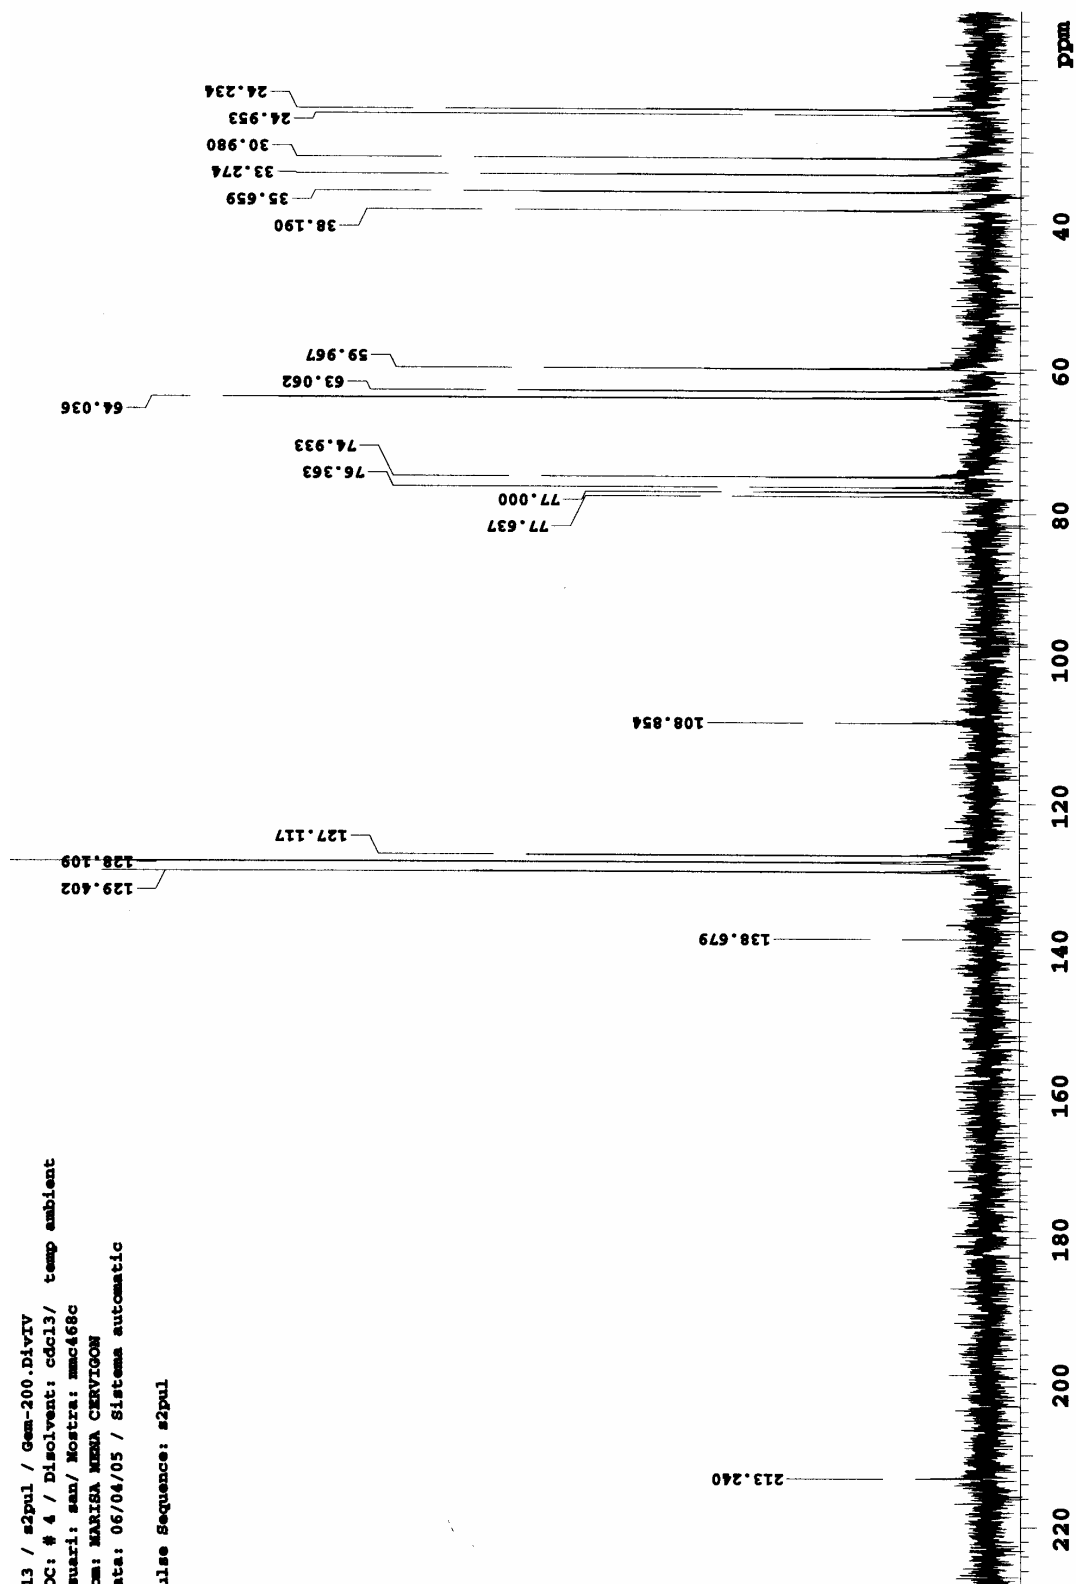

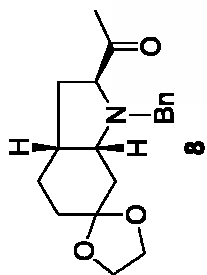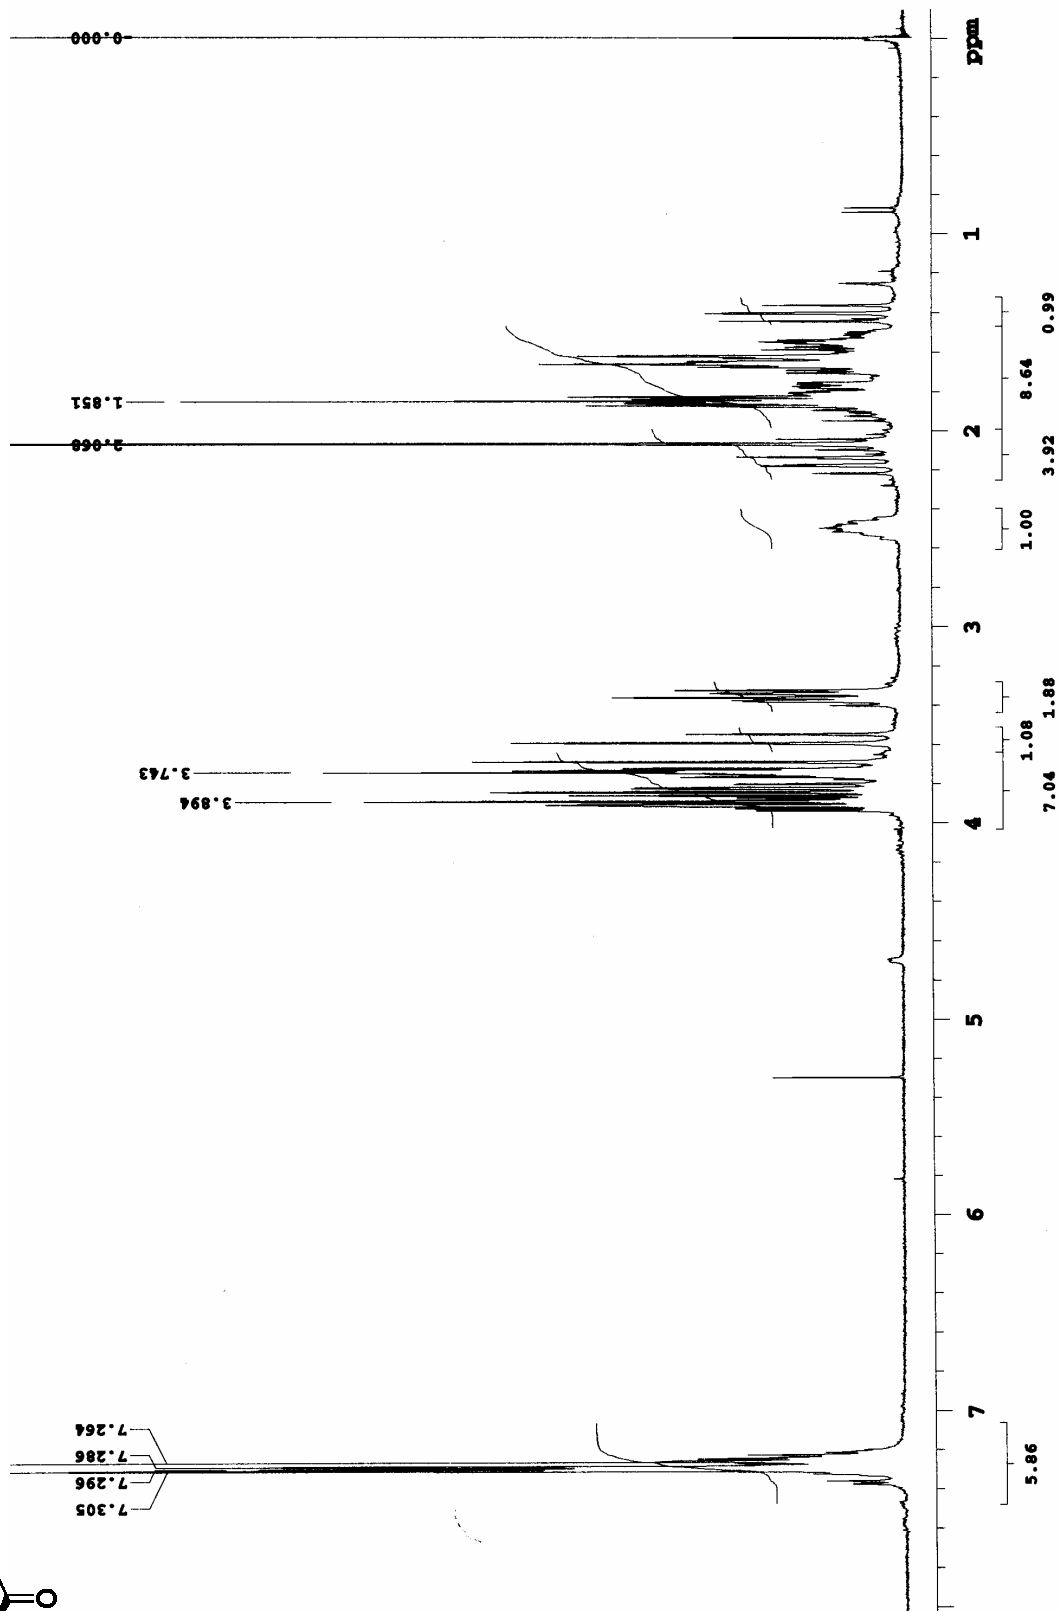

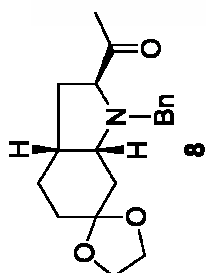

C13 / s2pul / Gem-200.DivIV  
 LOC: # 5 / Disolvent: cdcl3/ temp ambient  
 Usuari: san/ Mostra: mmc469c  
 Nom: MARISSA NENA CERVIGON  
 Data: 06/04/05 / Sistema automatic

Pulse Sequence: s2pul

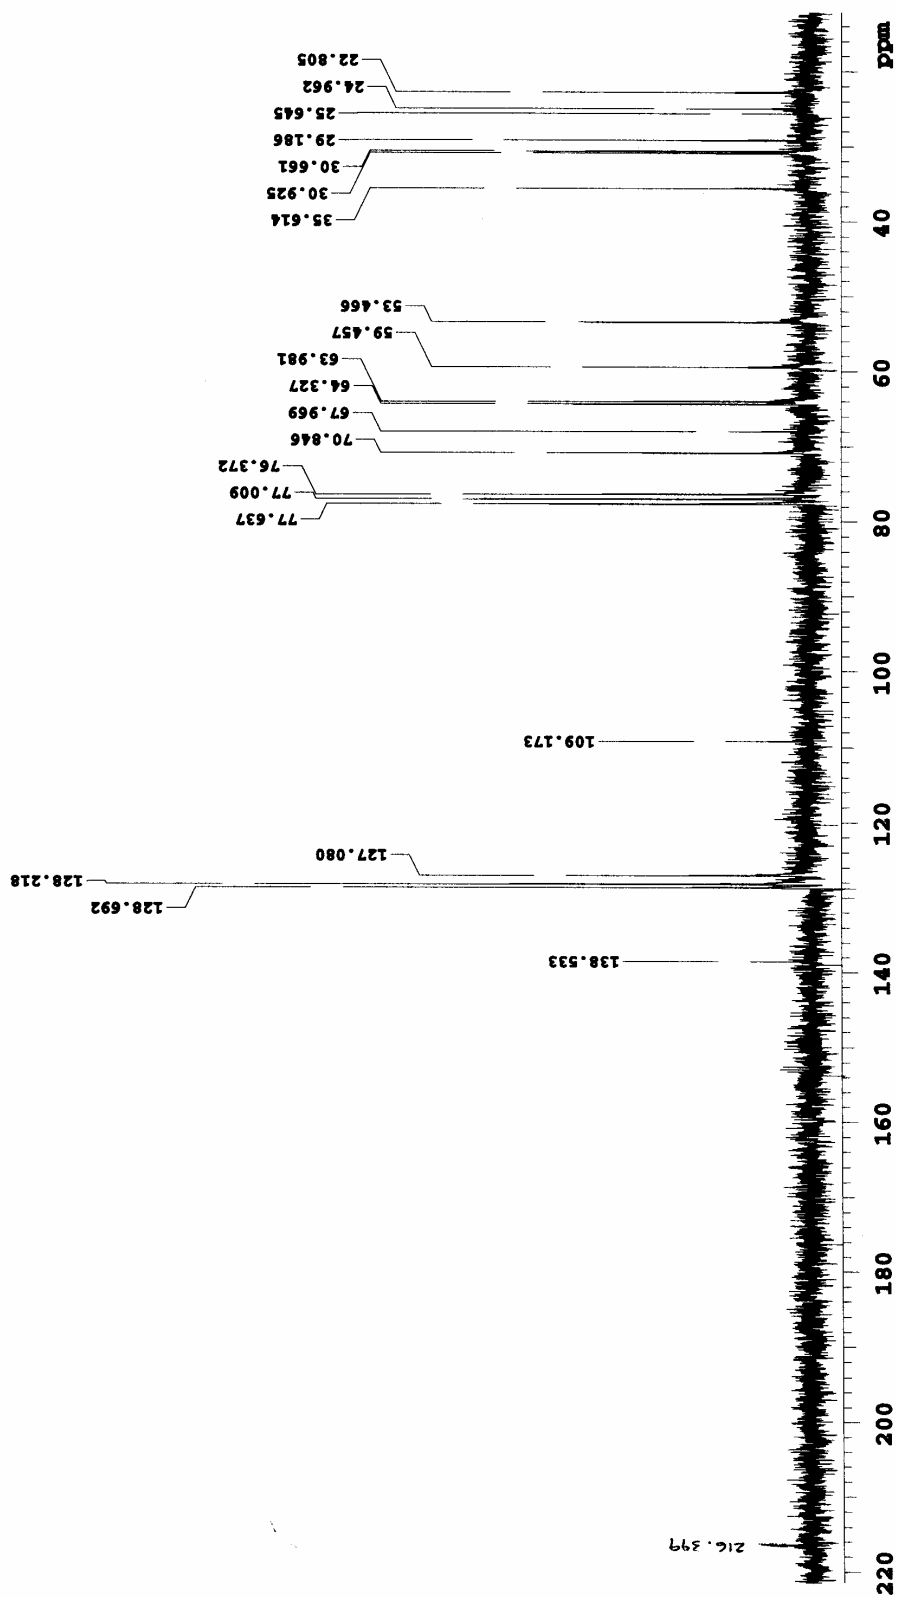

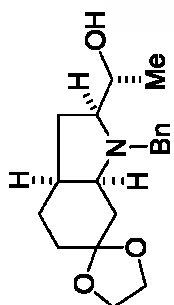

9a

H1 / s2pul / Gemini-300A  
 cdcl3/Temp: Ambient /W reg: PCB071105131633  
 Usuari: san q Mostra: mmc471t20  
 Nom: MARISA XENA CERVIGON  
 Data:07/11/05 / Sist automatic  
 Pulse Sequence: s2pul

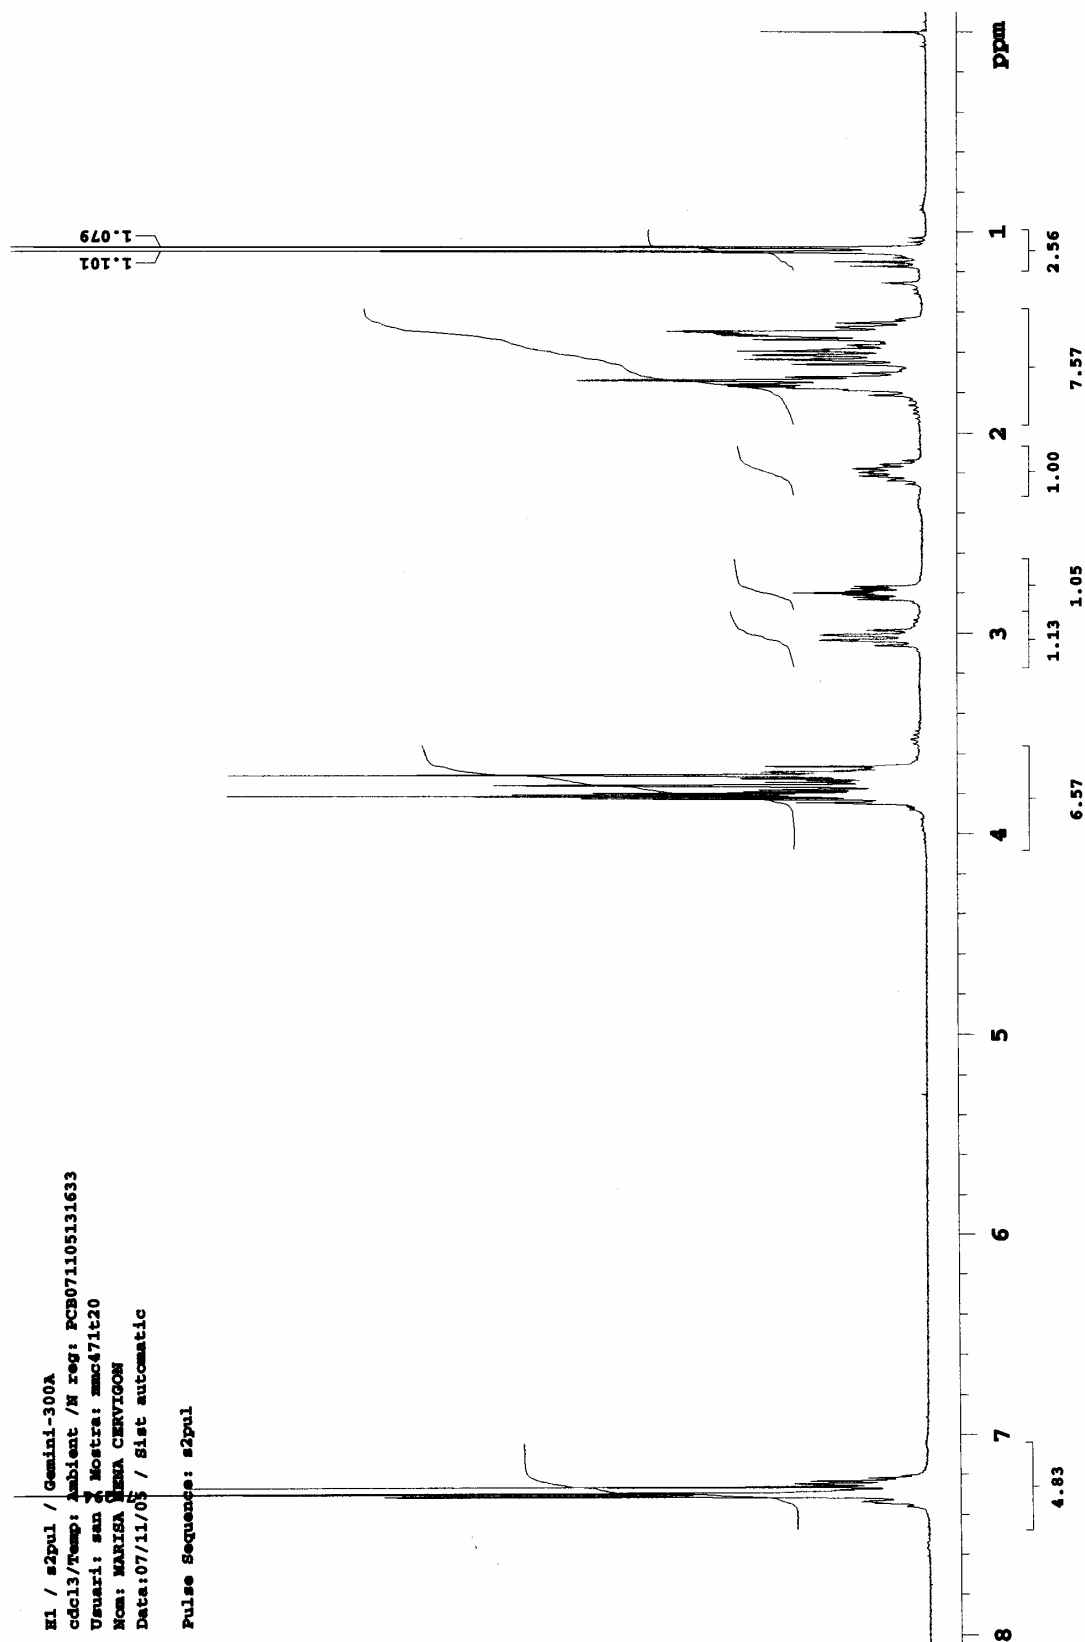



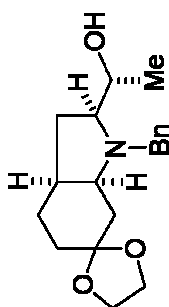

9a

H1 / s2pul / Gem-200.D1vTV  
 LOC: #10 / Dissolvent: cdcl3 / temp ambient  
 Usuari: san / Mostra: smac471  
 Nom: MARIA NEHA CERVIGON  
 Data: 25/04/05 / Sistema automatic

Pulse Sequence: s2pul

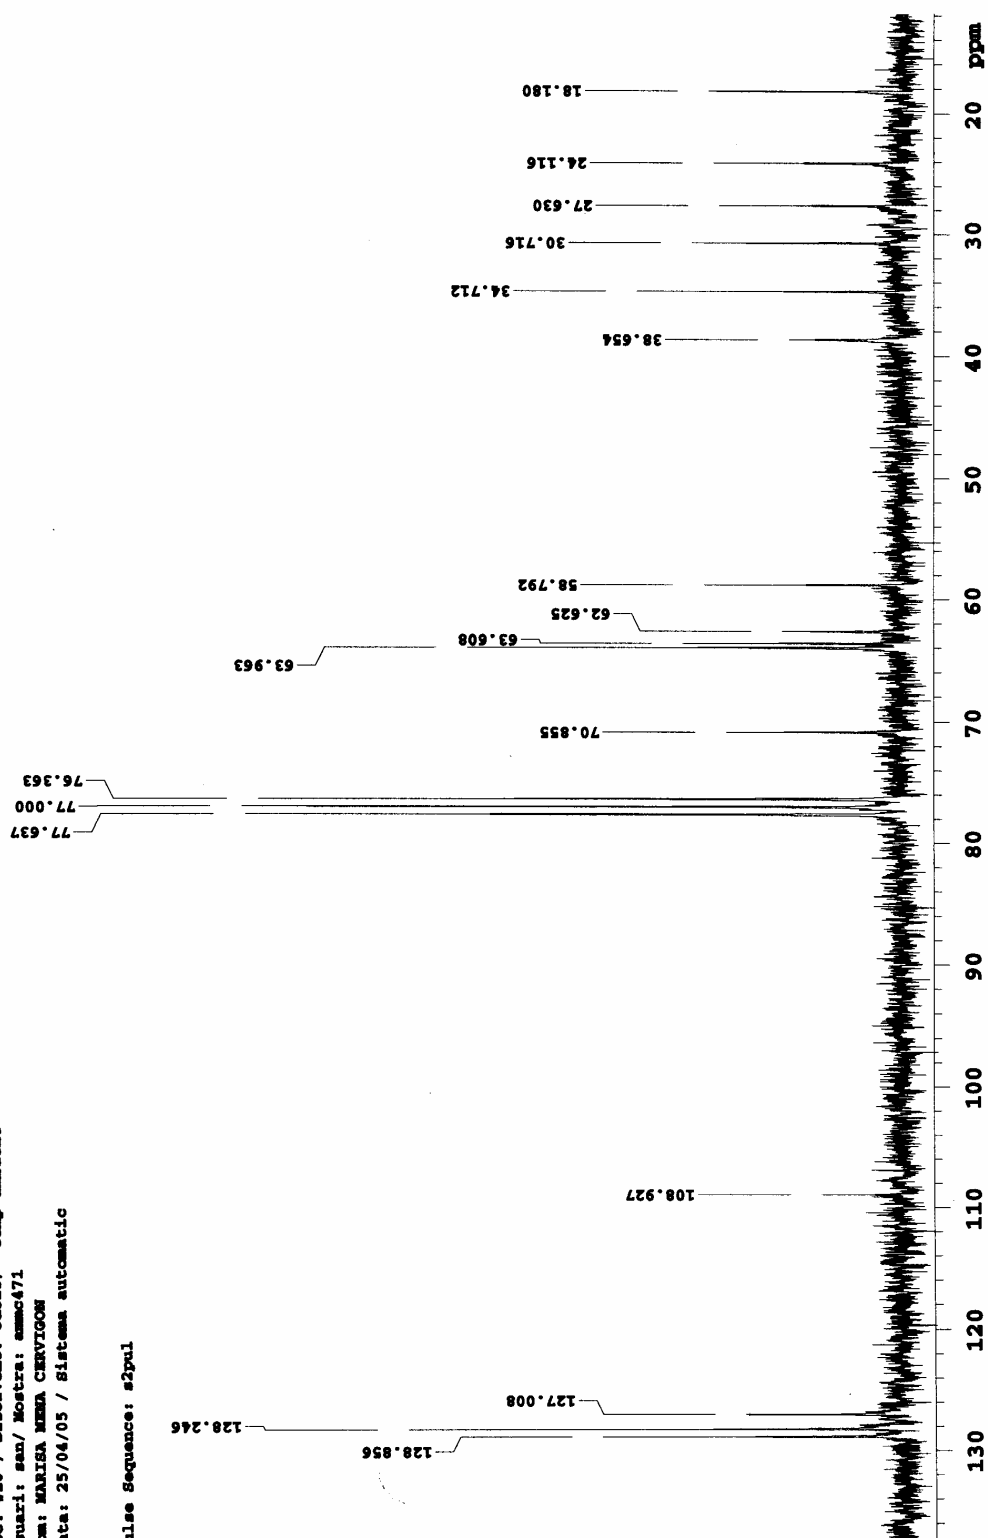

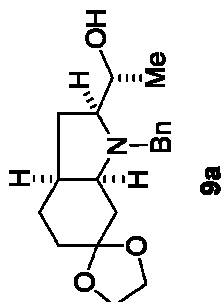

H1 / gCOSY / Mercury-600\_qui  
 cdc13/Temp: 25C /N reg: M40005-3560  
 Usuari: san / Mostra: mmc47219a60  
 Nom: MARISA MENA CERVIGON  
 Data:23/09/05 / Sist automatic

exp5 gCOSY

| SAMPLE              |                    | FLAGS         |          |
|---------------------|--------------------|---------------|----------|
| date                | Sep 23 2005        | hs            | nm       |
| solvent             | cdcl3              | aspu1         | n        |
| sample              | auto_Custom-hsglv1 | 1002          |          |
| Q_23Sep2005 SPECIAL |                    |               |          |
| ACQUISITION         |                    | temp          | 25.0     |
| sw                  | 5211.0             | gain          | 26       |
| at                  | 0.150              | spin          | 0        |
| np                  | 1564               | F2 PROCESSING |          |
| fb                  | not used           | ab            | -0.075   |
| ss                  | 16                 | abs           | not used |
| dl                  | 1.000              | fn            | 2048     |
| nt                  | 2                  | F1 PROCESSING |          |
| 2D ACQUISITION      |                    | ab1           | -0.049   |
| sw1                 | 5211.0             | abs1          | not used |
| ni                  | 256                | procl         | lp       |
| PRESATURATION       |                    | fn1           | 2048     |
| satmode             |                    | n             | DISPLAY  |
| satfrq              | 0                  | sp            | -348.3   |
| satdly              | 0                  | wp            | 2608.1   |
| satpwr              | 0                  | sp1           | -144.5   |
| TRANSMITTER         |                    | wp1           | 1920.4   |
| tn                  | H1                 | rf1           | 592.8    |
| sfrq                | 400.114            | rfp           | 0        |
| tof                 | -17.4              | rf11          | 592.8    |
| tpwr                | 58                 | rfp1          | 0        |
| pw                  | 12.200             | PLOT          |          |
| GRADIENTS           |                    | wc            | 131.8    |
| gzlwl1              | 1002               | sc            | 6.2      |
| gtl1                | 0.001000           | wc2           | 131.8    |
| gstab               | 0.000500           | sc2           | 0        |
| DECOUPLER           |                    | vs            | 243      |
| dn                  | C13                | th            | 14       |
| dm                  | nm                 | ai            | cdc      |
|                     |                    | av            |          |

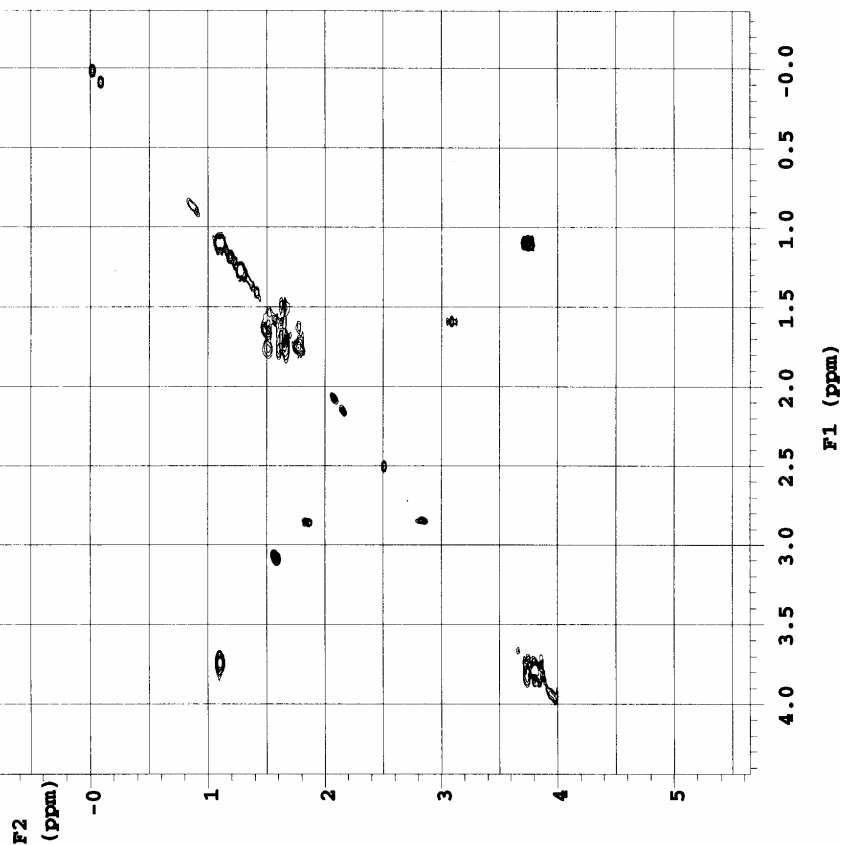

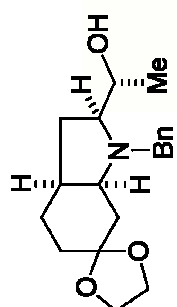

**9a**

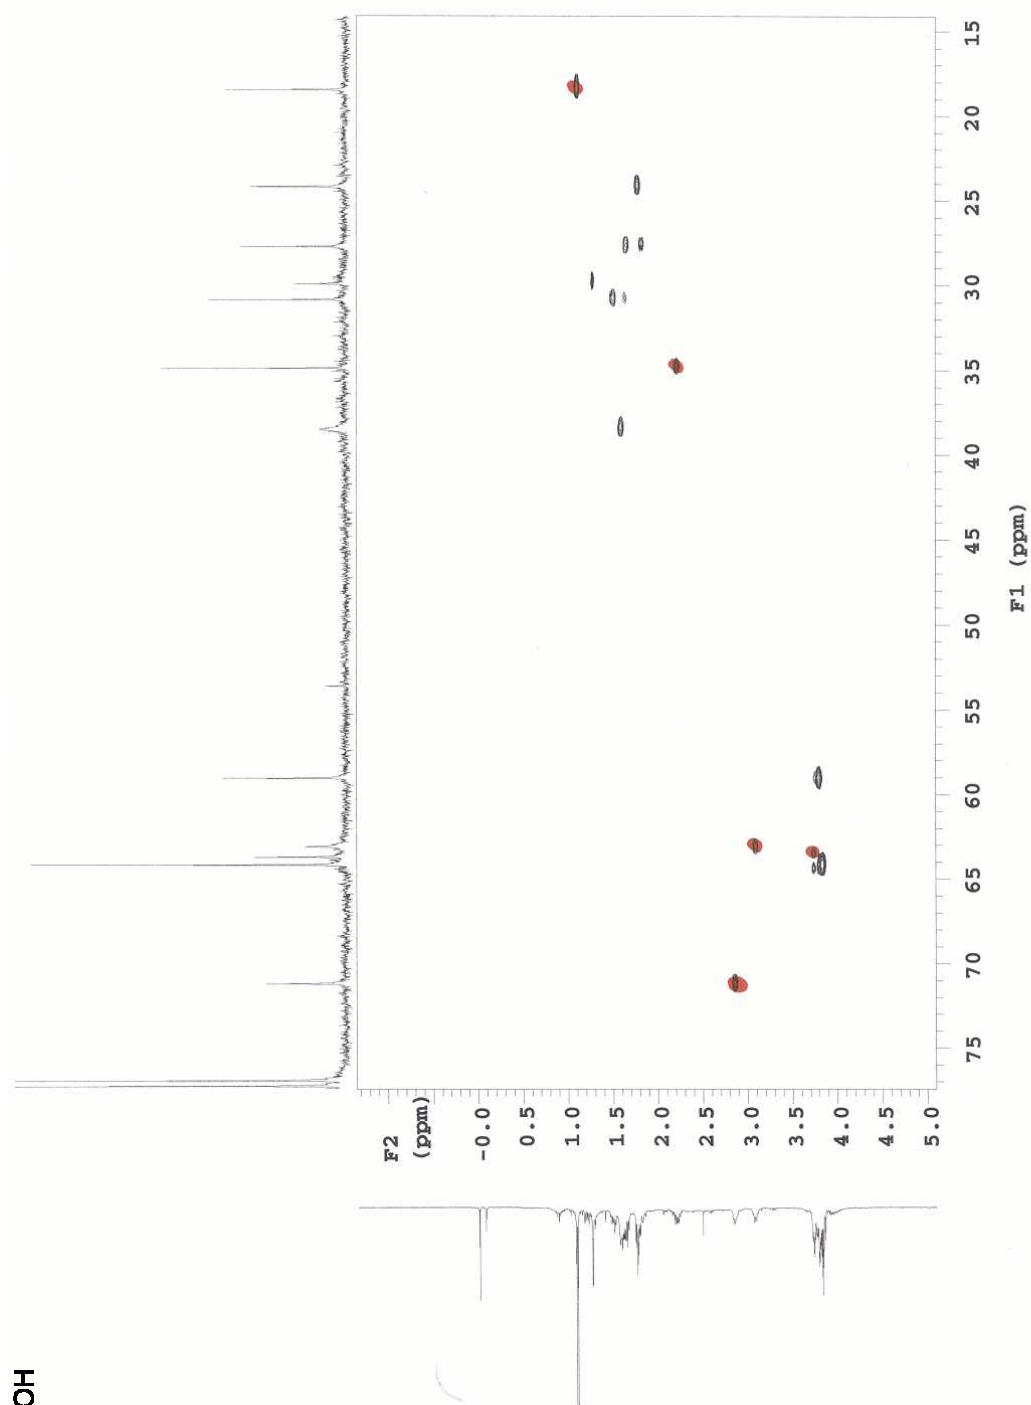

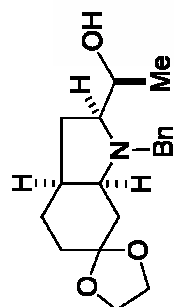

10a

H1 / s2pul / Mercury-400\_qul  
cdcl3/Temp: 25C / N reg: M40005-290905163836  
Usuari: san / Mostra: mmc472t22  
Nom: MARISA MERA CERVIGON  
Data:30/09/05 / Sist automatic

Pulse Sequence: zgpg30

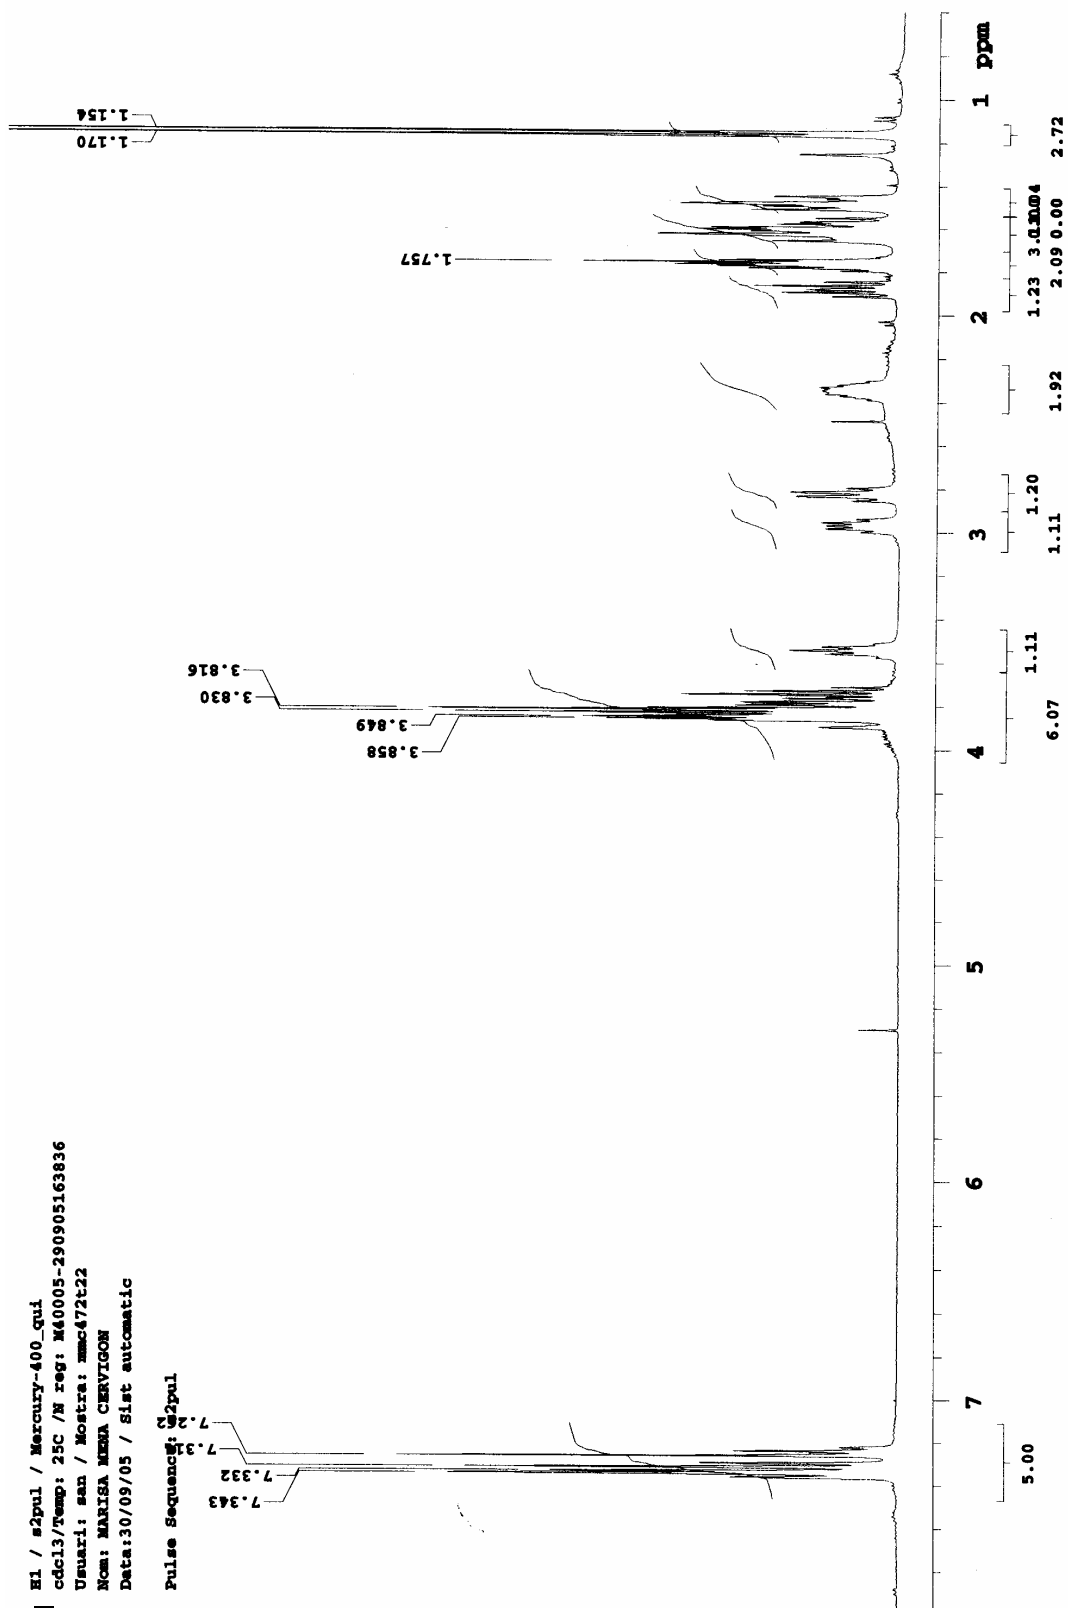

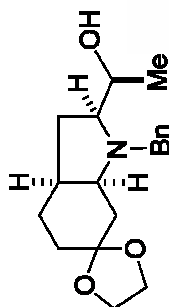

10a

C13 / s2pul / Mercury-400 qui  
 cdcl3/Temp: 25C / N reg: M40005-290905163836  
 Usuari: san / Most: mmc472t22  
 Nom: MARISA NENA CARRIQUON  
 Data:30/09/05 / Size automatic  
 Pulse Sequence: s2pul

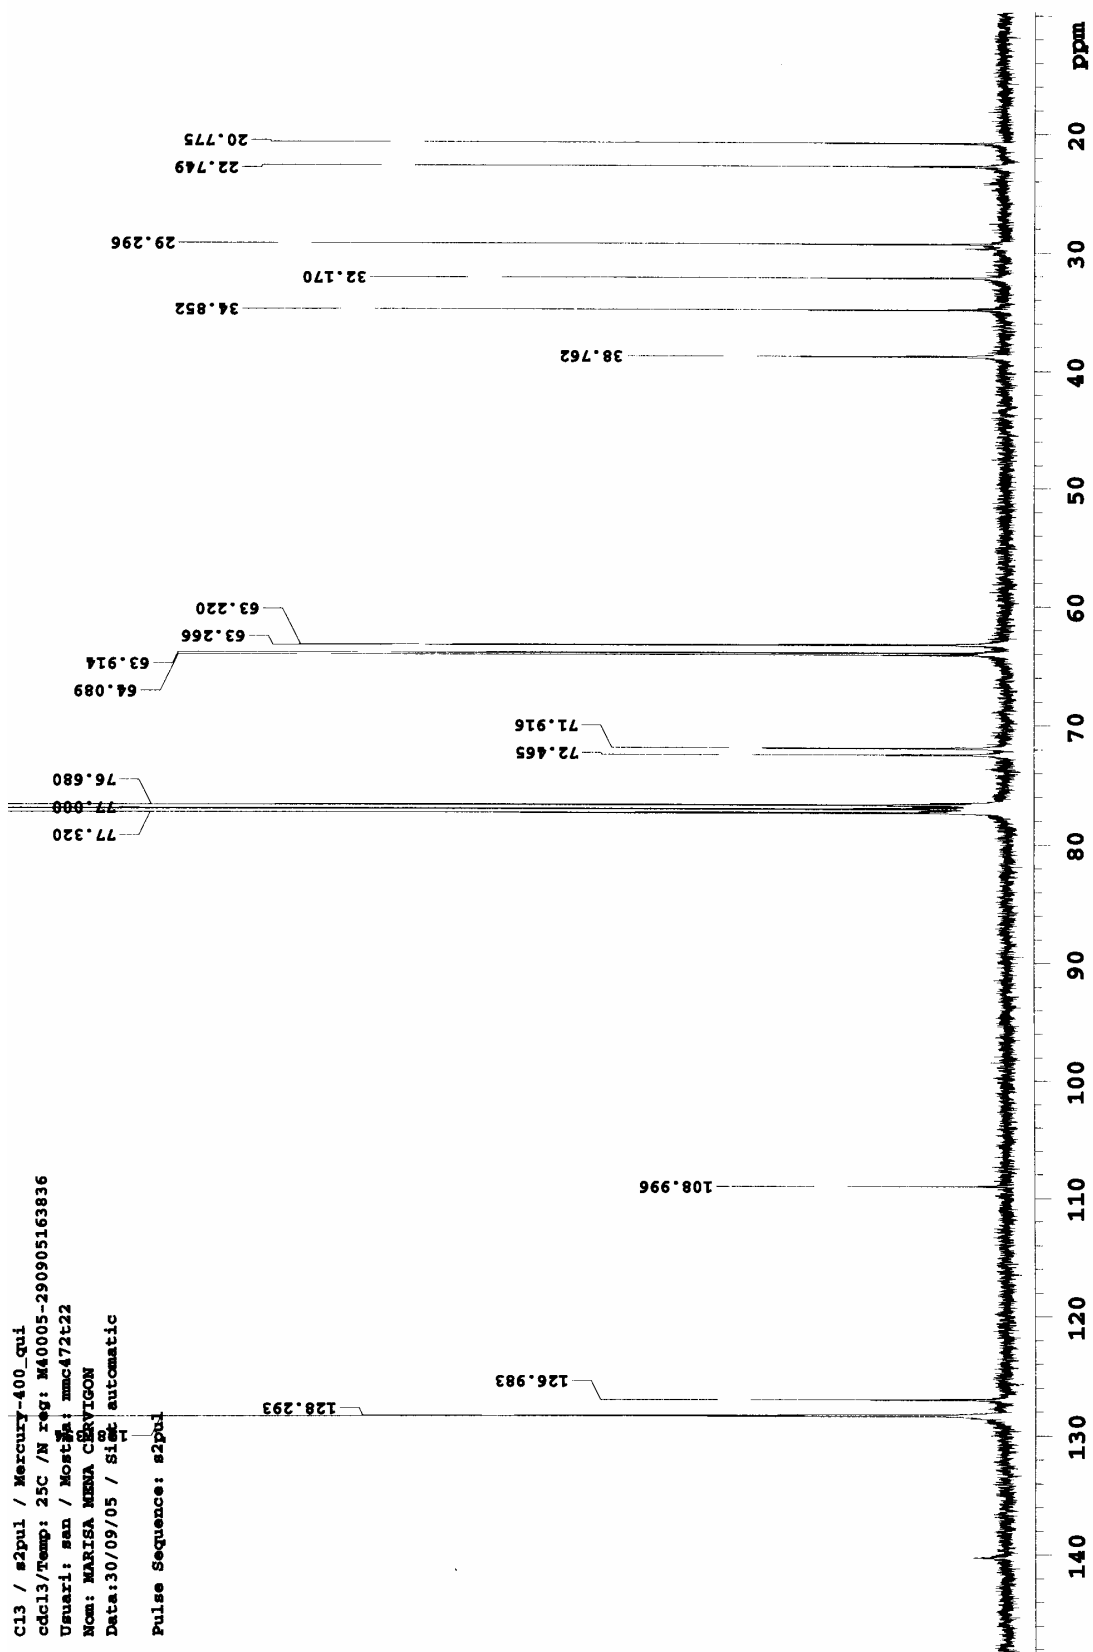

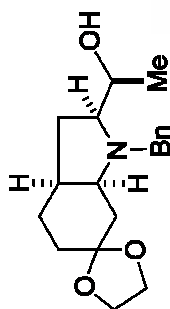

10a

H1 / gCOSY / Mercury-400\_gui  
cdcl3/Tmp: 25C / N reg: M40005-290905163

836

Usuari: san / Mostra: mmc472t22

Nom: MARISA MENA CERVIGON

Data:30/09/05 / Sist automatic

exp22 gCOSY

| SAMPLE         |                     | FLAGS         |          |
|----------------|---------------------|---------------|----------|
| date           | Sep 30 2005         | hs            | mn       |
| solvent        | cdcl3               | sspul         | n        |
| sample         | auto_Custom- hsglv1 | 1002          |          |
| Q_30Sep2005    |                     |               |          |
| ACQUISITION    |                     |               |          |
| sw             | 5211.0              | gain          | 25.0     |
| at             | 0.150               | spin          | 0        |
| np             | 1564                | F2 PROCESSING |          |
| fb             | not used            | sb            | -0.075   |
| ss             | 16                  | abs           | not used |
| d1             | 1.000               | fn            | 2048     |
| nt             | 4                   | F1 PROCESSING |          |
| 2D ACQUISITION |                     |               |          |
| sw1            | 5211.0              | abs1          | -0.049   |
| ni             | 256                 | proc1         | lp       |
| PRESATURATION  |                     |               |          |
| satmode        | n                   | DISPLAY       |          |
| satfrq         | 0                   | sp            | 254.8    |
| satdly         | 0                   | vp            | 1461.9   |
| satpwr         | 0                   | sp1           | 18.1     |
| TRANSMITTER    |                     |               |          |
| tn             | H1                  | xf1           | 1971.3   |
| sfreq          | 400.114             | rfp           | 595.9    |
| tof            | -17.1               | xf11          | 593.2    |
| tpwr           | 58                  | xfp1          | 0        |
| PLOT           |                     |               |          |
| pw             | 12.200              | vc            | 131.8    |
| GRADIENTS      |                     |               |          |
| gslw11         | 1002                | sc            | 6.2      |
| gt1            | 0.001000            | sc2           | 131.8    |
| gtab           | 0.000500            | sc2           | 0        |
| DECOUPLER      |                     |               |          |
| dn             | C13                 | th            | 493      |
| dm             | mn                  | ai            | cdc      |
|                |                     | av            | 8        |

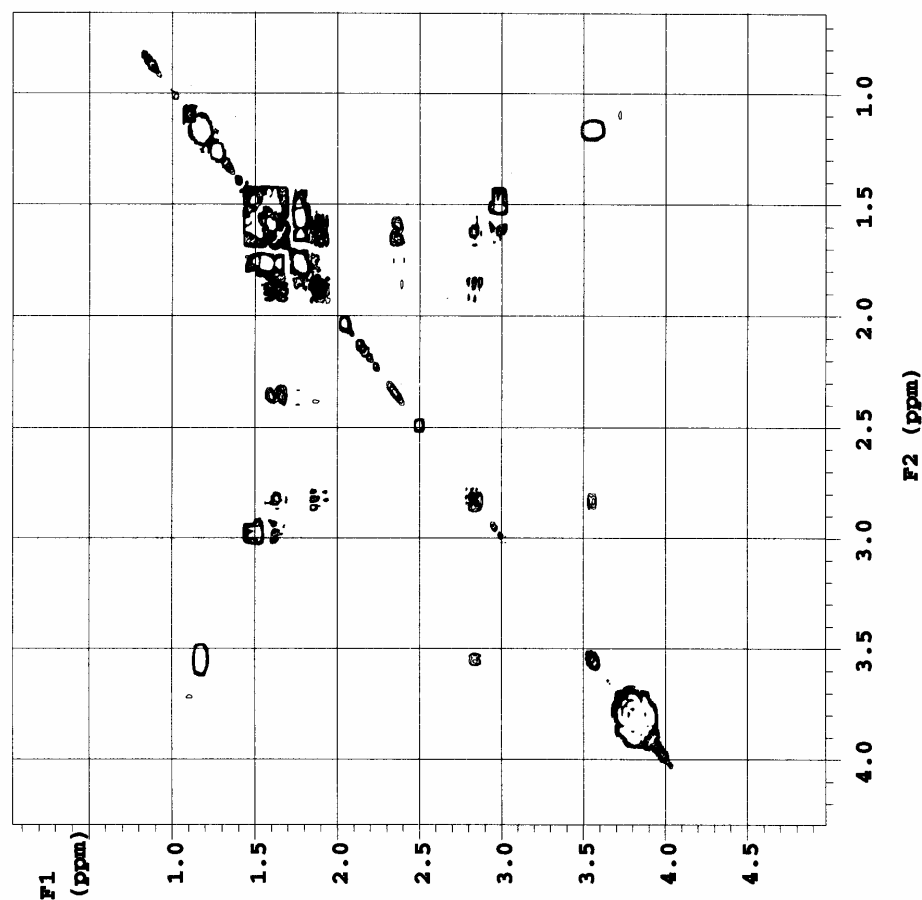

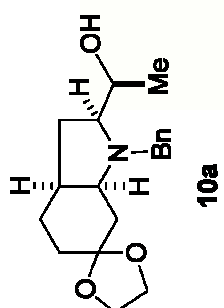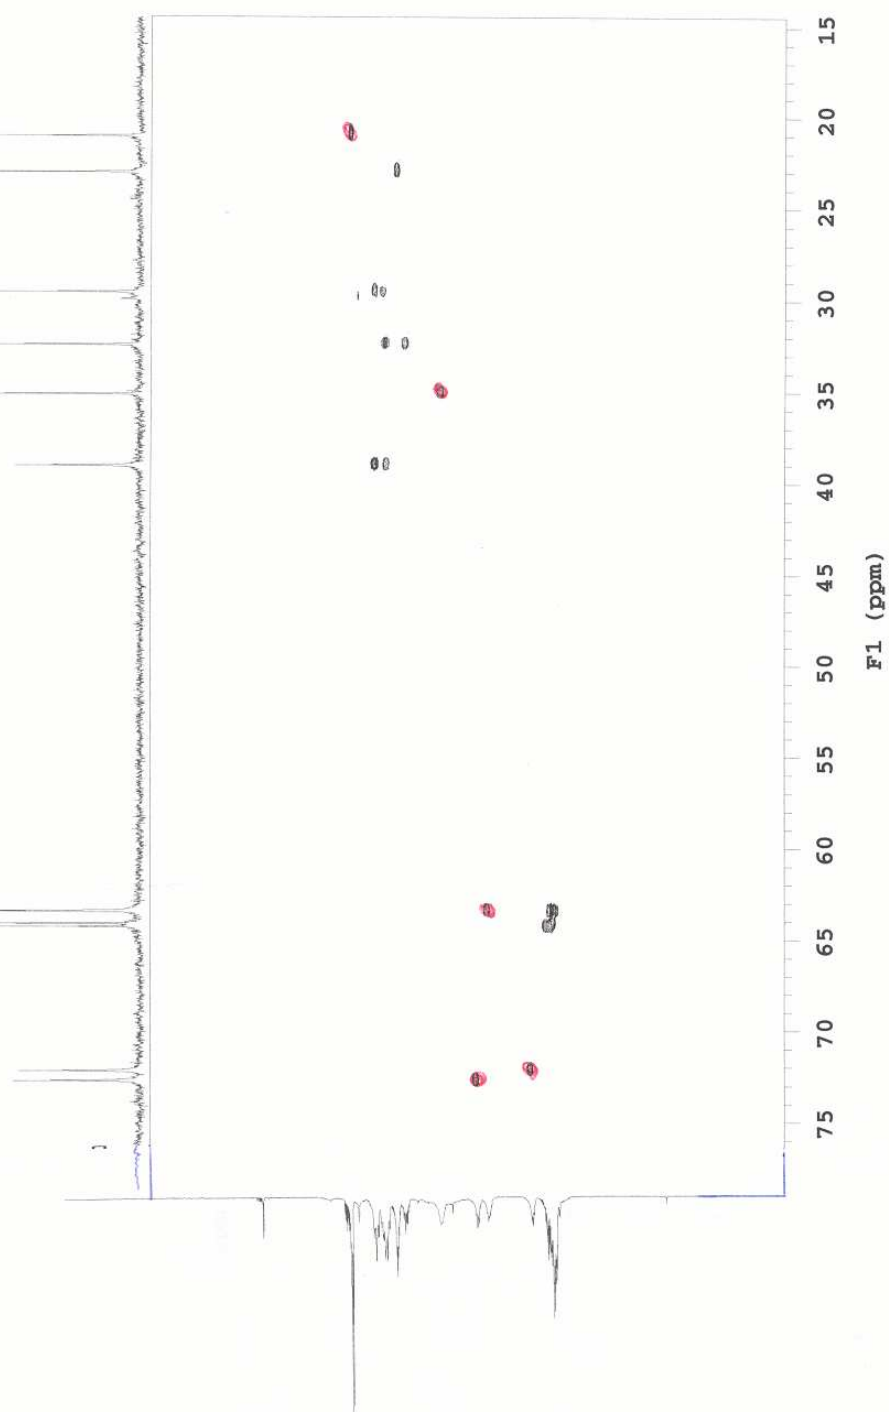

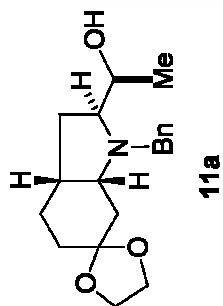

H1 / s2pul / Mercury-400\_qui  
 cdcl3/Temp: 25C / N reg: M40005-141005165205  
 Usuari: san / Spectra: amac470  
 Nom: MARISA / M40005-141005165205  
 Data: 14/10/05 / Sist automatic  
 Pulse Sequence: s2pul

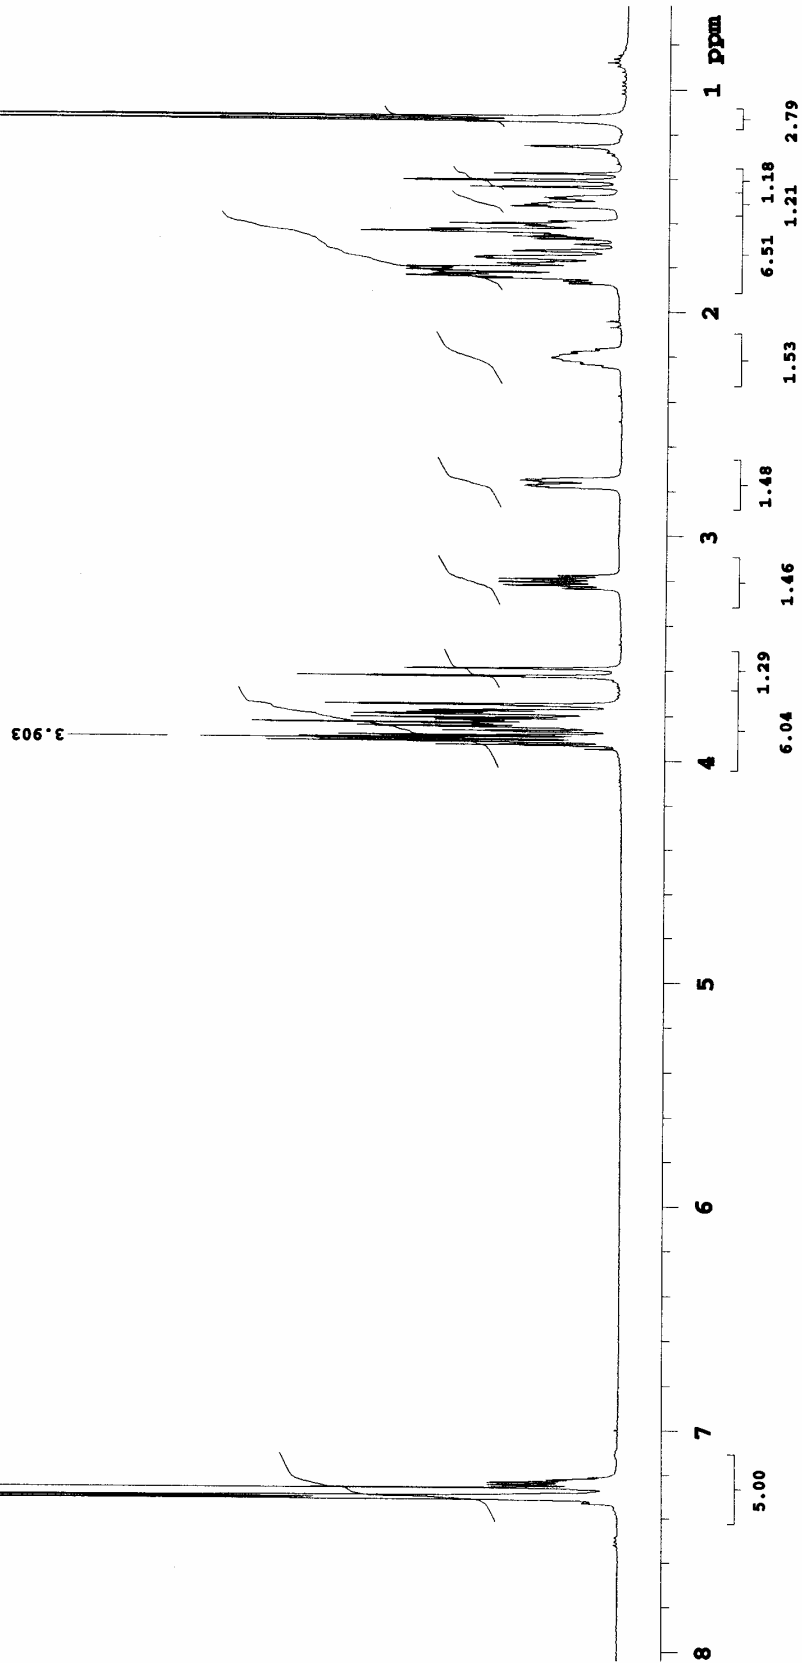



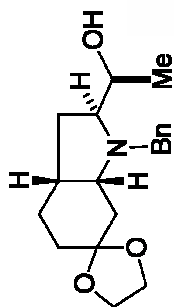

11a

C13 / s2pul / Mercury-400\_qui  
 cdcl3/Tmp: 25C / N reg: 3703/2005  
 Usuari: san / Mostra: 200470  
 Nom: MARIA NINA CERRON  
 Data:14/10/05 / Sist:Automatic  
 Pulse Sequence: s2pul

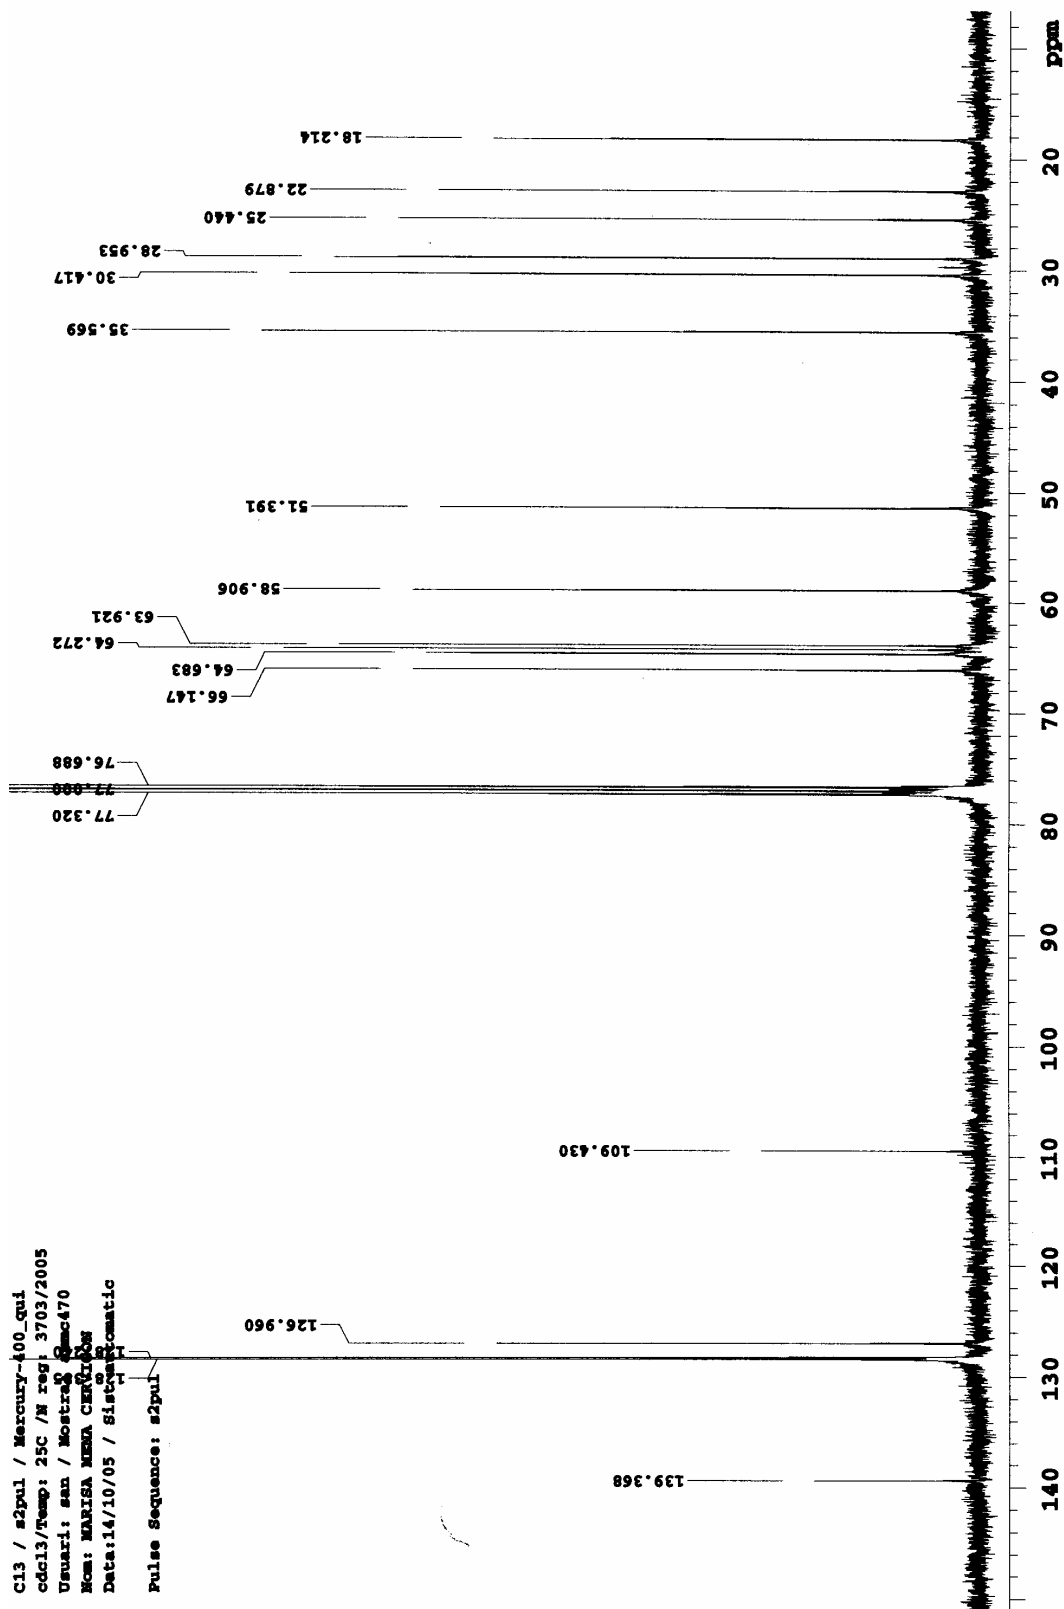

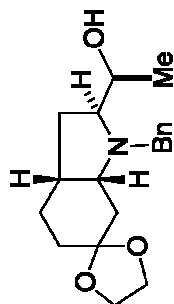

11a

H1 / gCOSY / Mercury-400.qui  
cdcl3/Temp: 25C /N reg: M40005-141005165

205

Usuari: san / Mostra: amac470  
Nom: MARISA MENA CERVIGON

Data:14/10/05 / Sist automatic

exp5 gCOSY

| SAMPLE                      |                    | FLAGS         |          |
|-----------------------------|--------------------|---------------|----------|
| date                        | Oct 14 2005        | hs            | nm       |
| solvent                     | cdcl3              | sspul         | n        |
| sample                      | auto_Custom-haglv1 | 1002          |          |
| Q_14Oct2005-17:48:- SPECIAL |                    |               |          |
| 15 temp 25.0                |                    |               |          |
| ACQUISITION                 |                    |               |          |
| sw                          | 3906.2             | gain          | 28       |
| at                          | 0.150              | F2 PROCESSING | 0        |
| tp                          | 1172               | sb            | -0.075   |
| fb                          | not used           | sbs           | not used |
| ss                          | 16                 | fn            | 2048     |
| d1                          | 1.000              | F1 PROCESSING |          |
| nt                          | 4                  | sb1           | -0.066   |
| 2D ACQUISITION              |                    |               |          |
| sw1                         | 3906.2             | proc1         | lp       |
| ni                          | 256                | fn1           | 2048     |
| PRESATURATION DISPLAY       |                    |               |          |
| satmode                     | n                  | sp            | -13.6    |
| satfrq                      | 0                  | wp            | 1836.7   |
| satlty                      | 0                  | sp1           | 280.5    |
| satpwr                      | 0                  | wp1           | 1428.1   |
| TRANSMITTER                 |                    |               |          |
| tn                          | H1                 | rfl           | 483.2    |
| sfreq                       | 400.113            | rfl1          | 483.2    |
| tof                         | -553.6             | rflp1         | 0        |
| tpwr                        | 58                 | PLOT          |          |
| pw                          | 12.200             | wc            | 131.8    |
| GRADIENTS                   |                    |               |          |
| gzlv11                      | 1002               | sc            | 6.2      |
| gt1                         | 0.001000           | sc2           | 131.8    |
| gstab                       | 0.000500           | vs            | 361      |
| DECOUPLER                   |                    |               |          |
| dn                          | C13                | ai            | cdc      |
| dm                          | nm                 | av            |          |

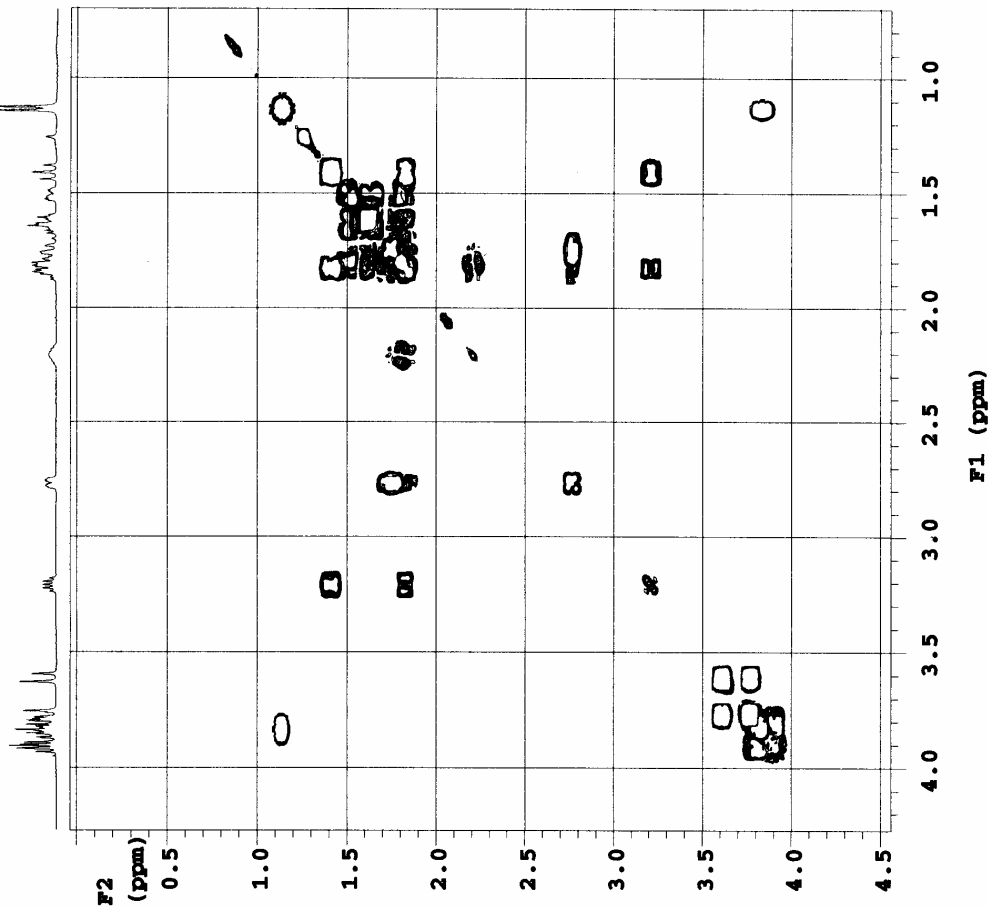

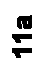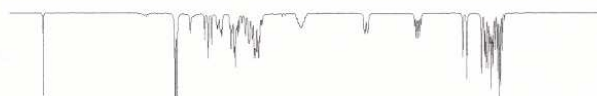

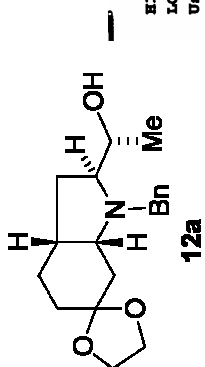

H1 / s2pul / Gem-200.DIVIV  
 LOC: #39 / Disolvent: cdcl3/ temp ambient  
 Usuari: sanja Mostra: hmc238  
 Nom: MARIANA CERVIGON  
 Data: 15/10/03 / Sistema automatic  
 Pulse Sequence: s2pul

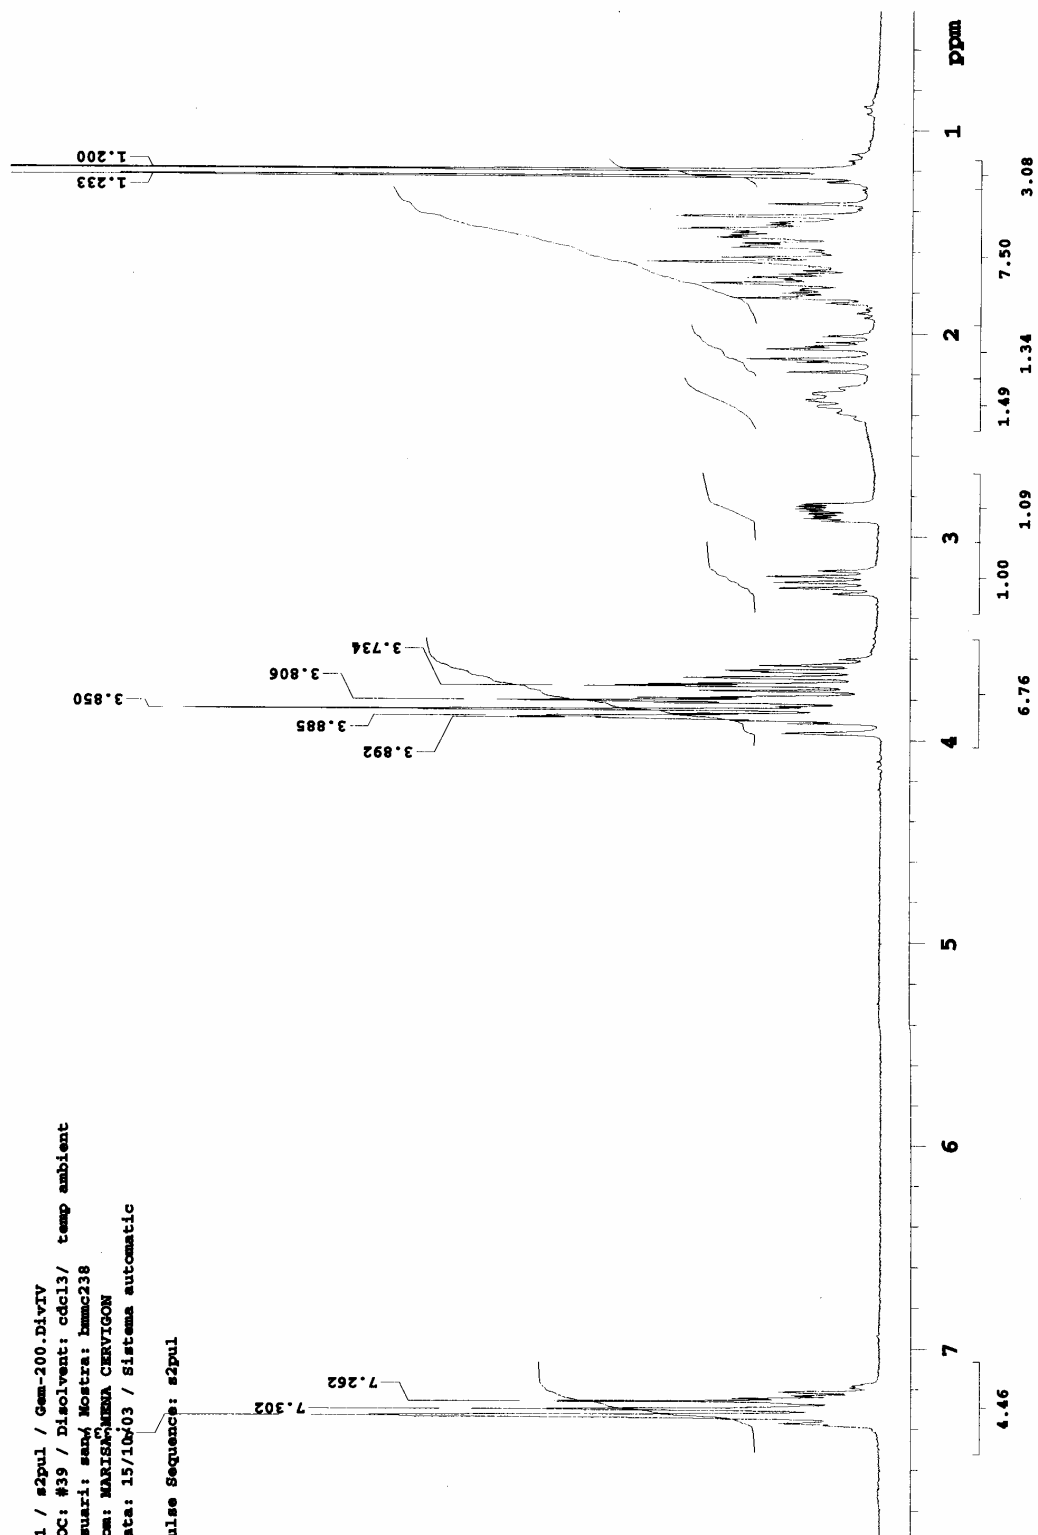

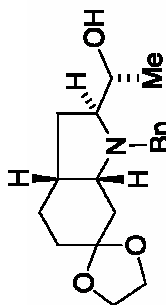

12a

C13 / s2pul / vsm-400.000.MAV14  
 LOC: #20 / Disolvent: cdcl3/ temp ambient  
 Usuari: san/ Mostres: 18\_mmc238  
 Nom: SANDRA DIAZ FINE  
 Data: 16/10/03 / Sig: ca automatic  
 Pulse Sequence: s2pul

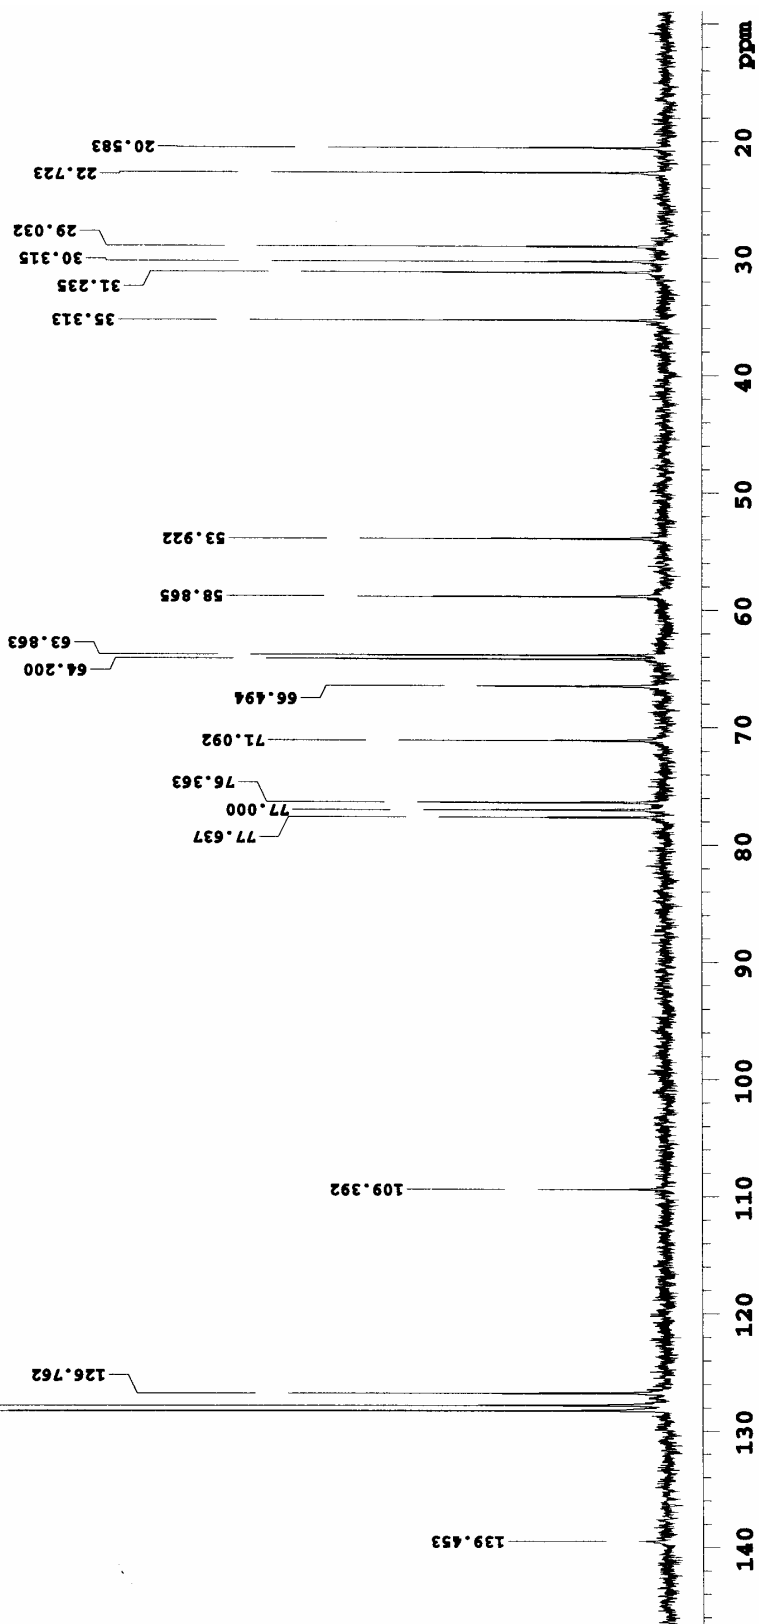

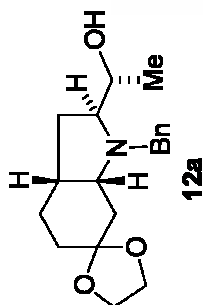

H1 / gCOSY / Mercury-400.qui  
 cdc13/Temp: 25C / N reg: M40005-211005163  
 841  
 Usuari: san / Mostra: benzoh  
 Nom: MARIA MENA CERVIGION  
 Data:21/10/05 / sist automatic

exp6 gCOSY

| SAMPLE              |             | FLAGS         |          |
|---------------------|-------------|---------------|----------|
| date                | Oct 21 2005 | hs            | nn       |
| solvent             | cdc13       | aspl          | n        |
| sample auto         | Custom-hs   | gvl           | 1002     |
| Q_21Oct2005-18:41:- | SPECIAL     |               |          |
| 55                  | temp        | 25.0          |          |
| ACQUISITION         |             |               |          |
| sw                  | 3937.0      | gain          | 32       |
| at                  | 0.150       | F2 PROCESSING | 0        |
| np                  | 1182        | sb            | -0.075   |
| fb                  | not used    | sbs           | not used |
| ss                  | 16          | fn            | 2048     |
| dl                  | 1.000       | F1 PROCESSING |          |
| nt                  | 8           | sb1           | -0.065   |
| 2D ACQUISITION      |             |               |          |
| sw1                 | 3937.0      | procl         | lp       |
| nl                  | 256         | fn1           | 2048     |
| PRESATURATION       |             |               |          |
| satmode             | n           | sp            | 13.2     |
| satfrq              | 0           | wp            | 1762.6   |
| satdly              | 0           | sp1           | 267.2    |
| satpr               | 0           | wp1           | 1427.8   |
| TRANSMITTER         |             |               |          |
| tn                  | H1          | rfd           | 0        |
| sfrq                | 400.113     | rfl1          | 487.1    |
| tof                 | -538.3      | rfd1          | 0        |
| tpwz                | 58          | PLOT          |          |
| pw                  | 12.200      | wc            | 131.8    |
| GRADIENTS           |             |               |          |
| gvlv11              | 1002        | sc            | 6.2      |
| gt1                 | 0.001000    | sc2           | 0        |
| gstab               | 0.000500    | vs            | 369      |
| DECOUPLER           |             |               |          |
| dn                  | C13         | al            | cdc      |
| dm                  | nn          | av            |          |

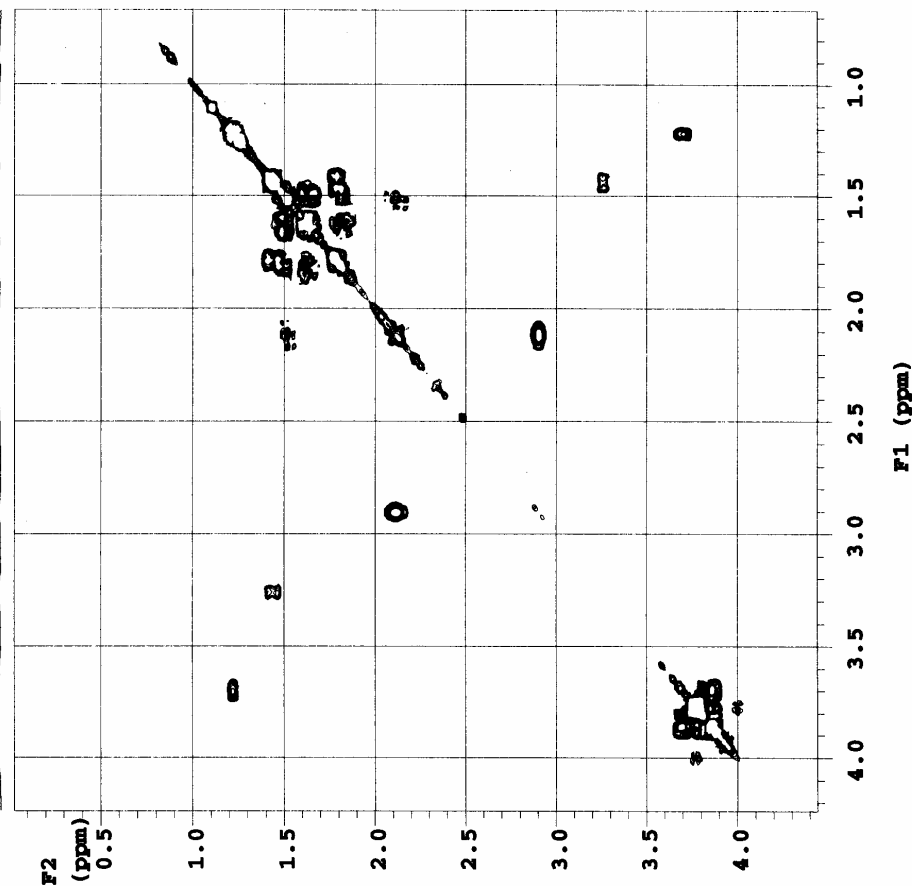

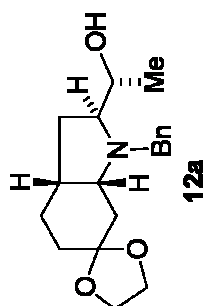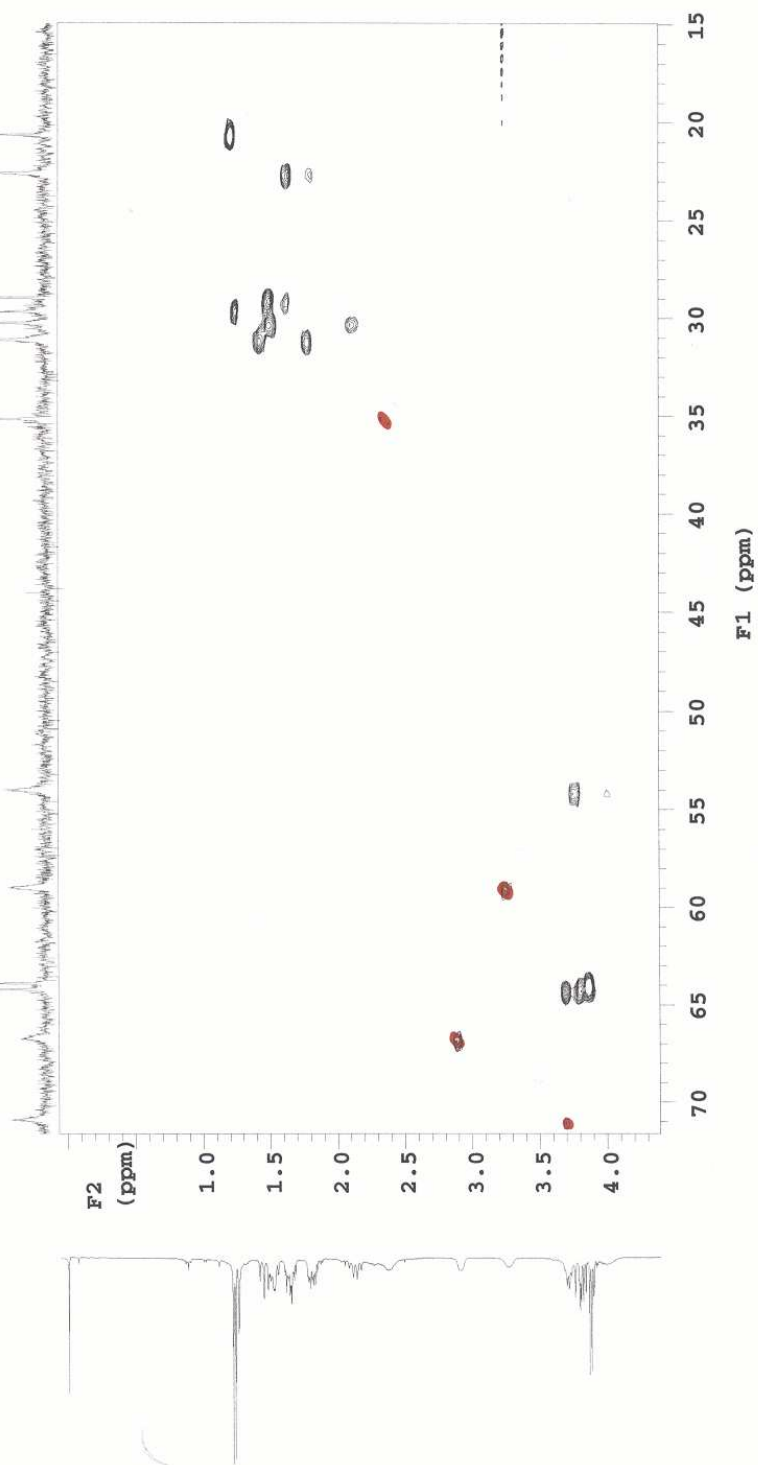

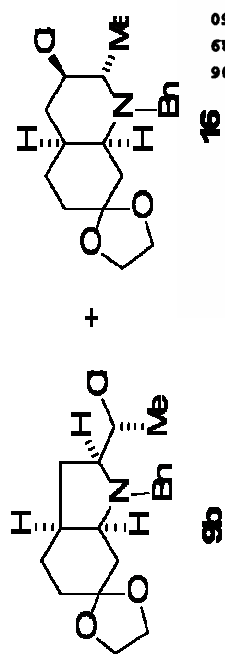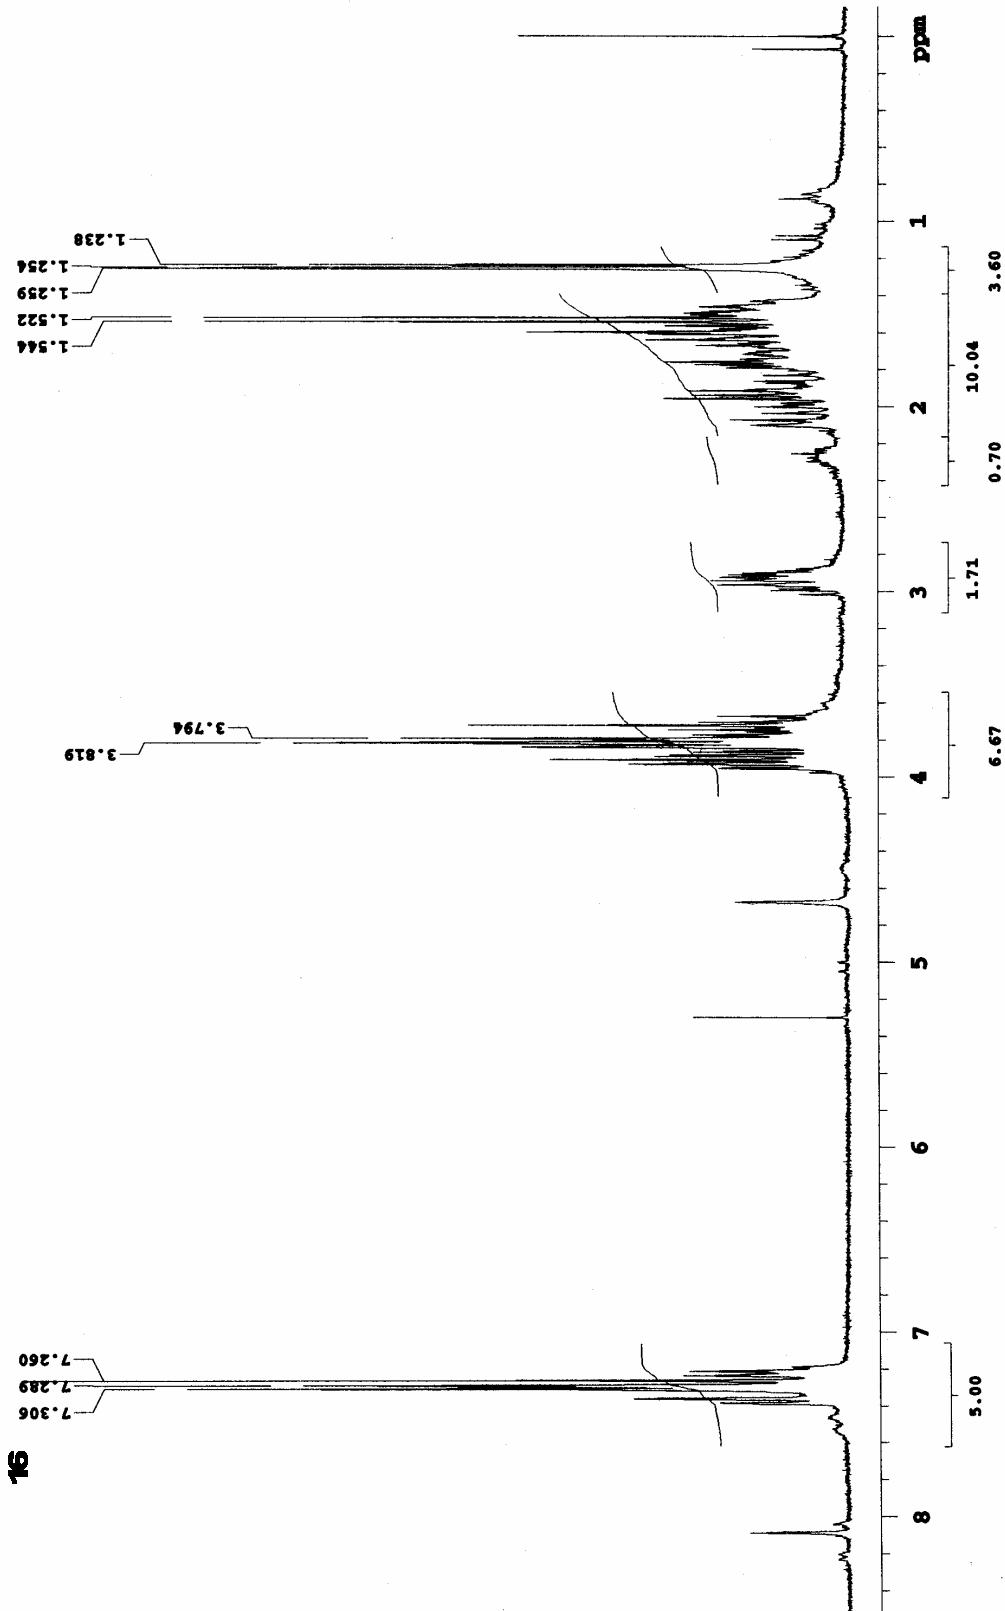



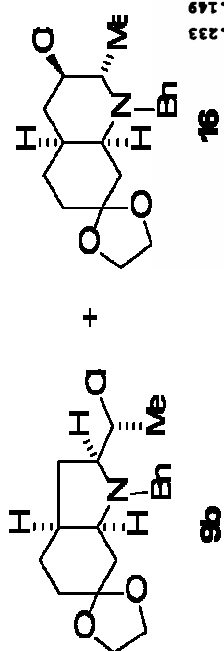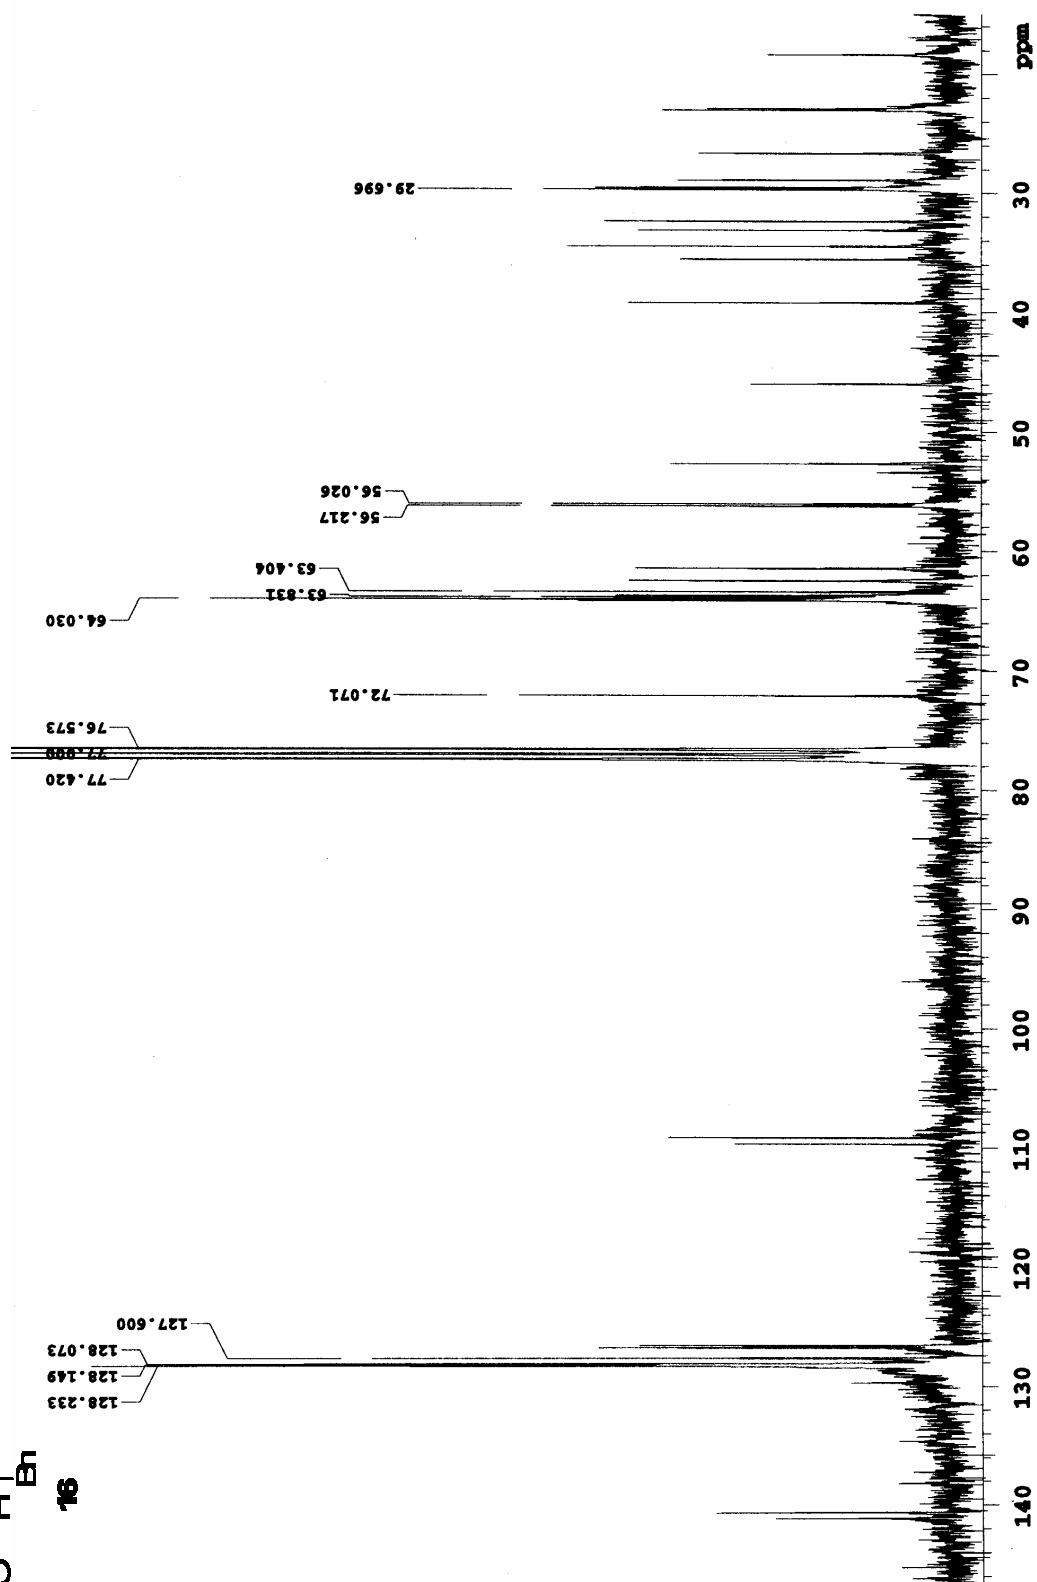

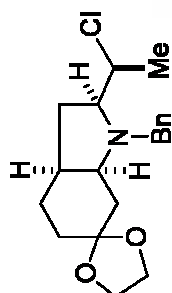

H1 / s2pul / Mercury-400\_qui  
 cdcl3/Temp: 25C /N reg: M40005-041005164746  
 Usuari: sala / Mostra: bendocl  
 Nom: MARISA / JENIA CERVIGON  
 Data:04/10/05 / Sist automatic  
 Pulse Sequence: s2pul

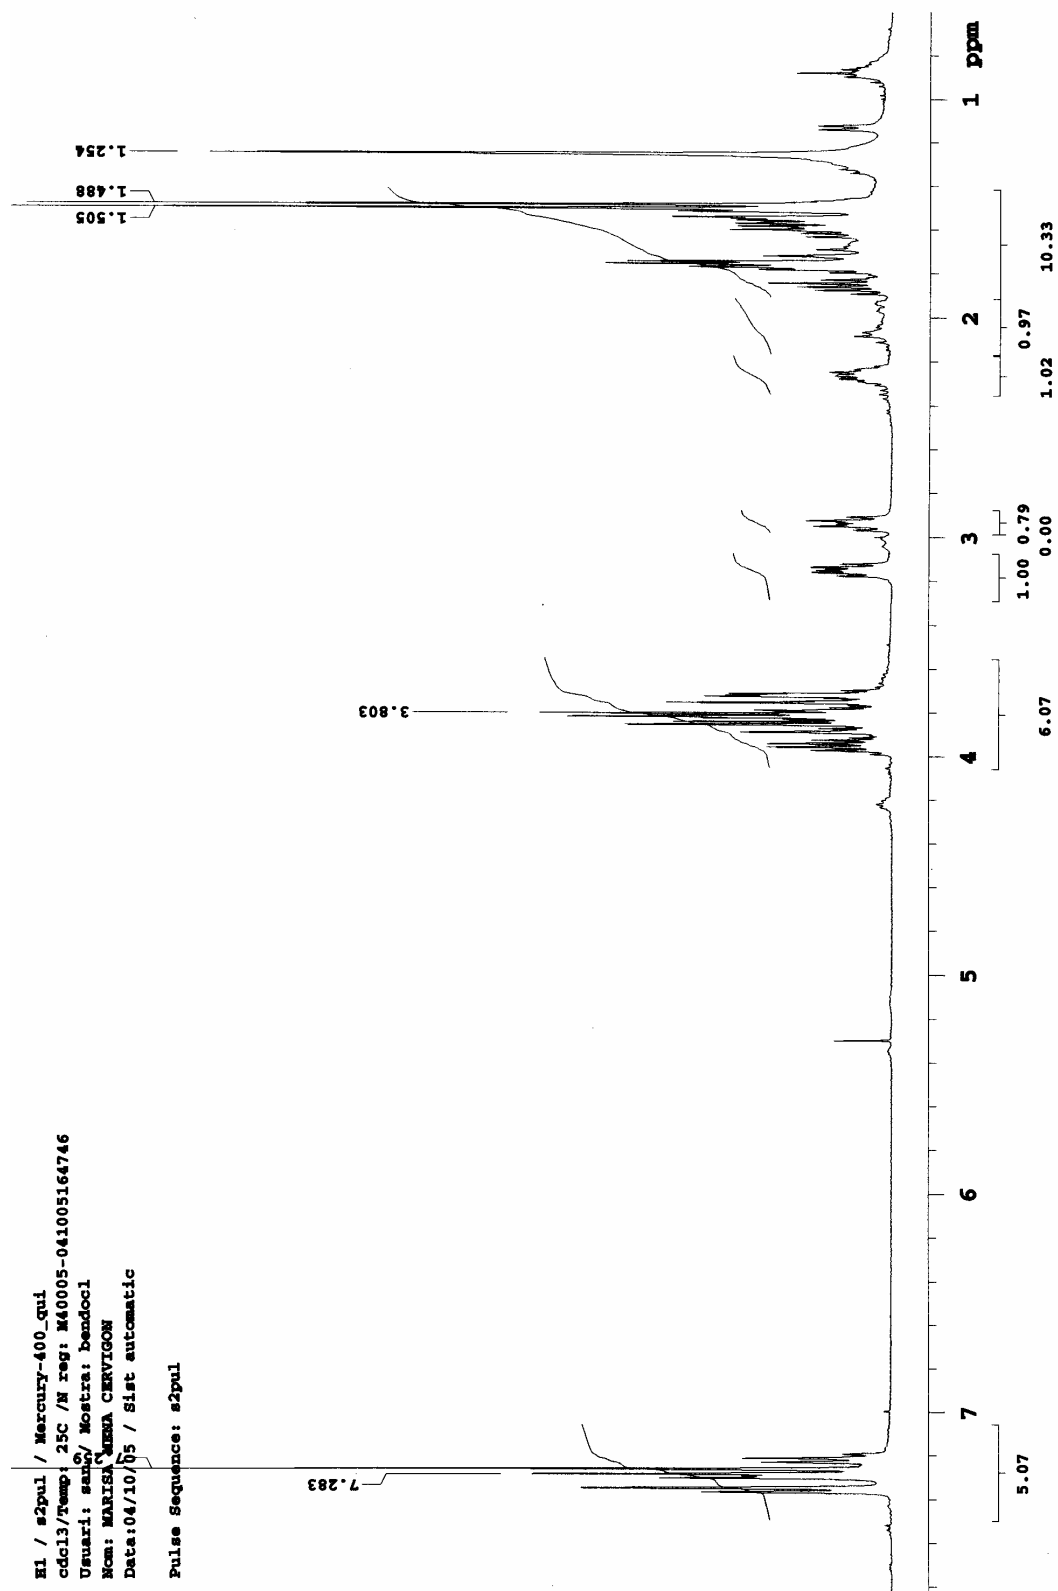

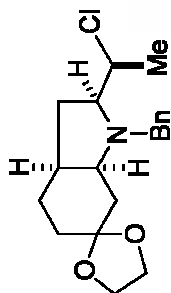

C13 / s2pul / Mercury-400.qhi  
 cdcl3/Tmp: 25C / N reg: M40005-041005164746  
 Usuari: san / Mostra: b00001  
 Nom: MARISA MENA CERVIGÓN  
 Data: 05/10/05 / Sist aut: b00001  
 Pulse Sequence: s2pul

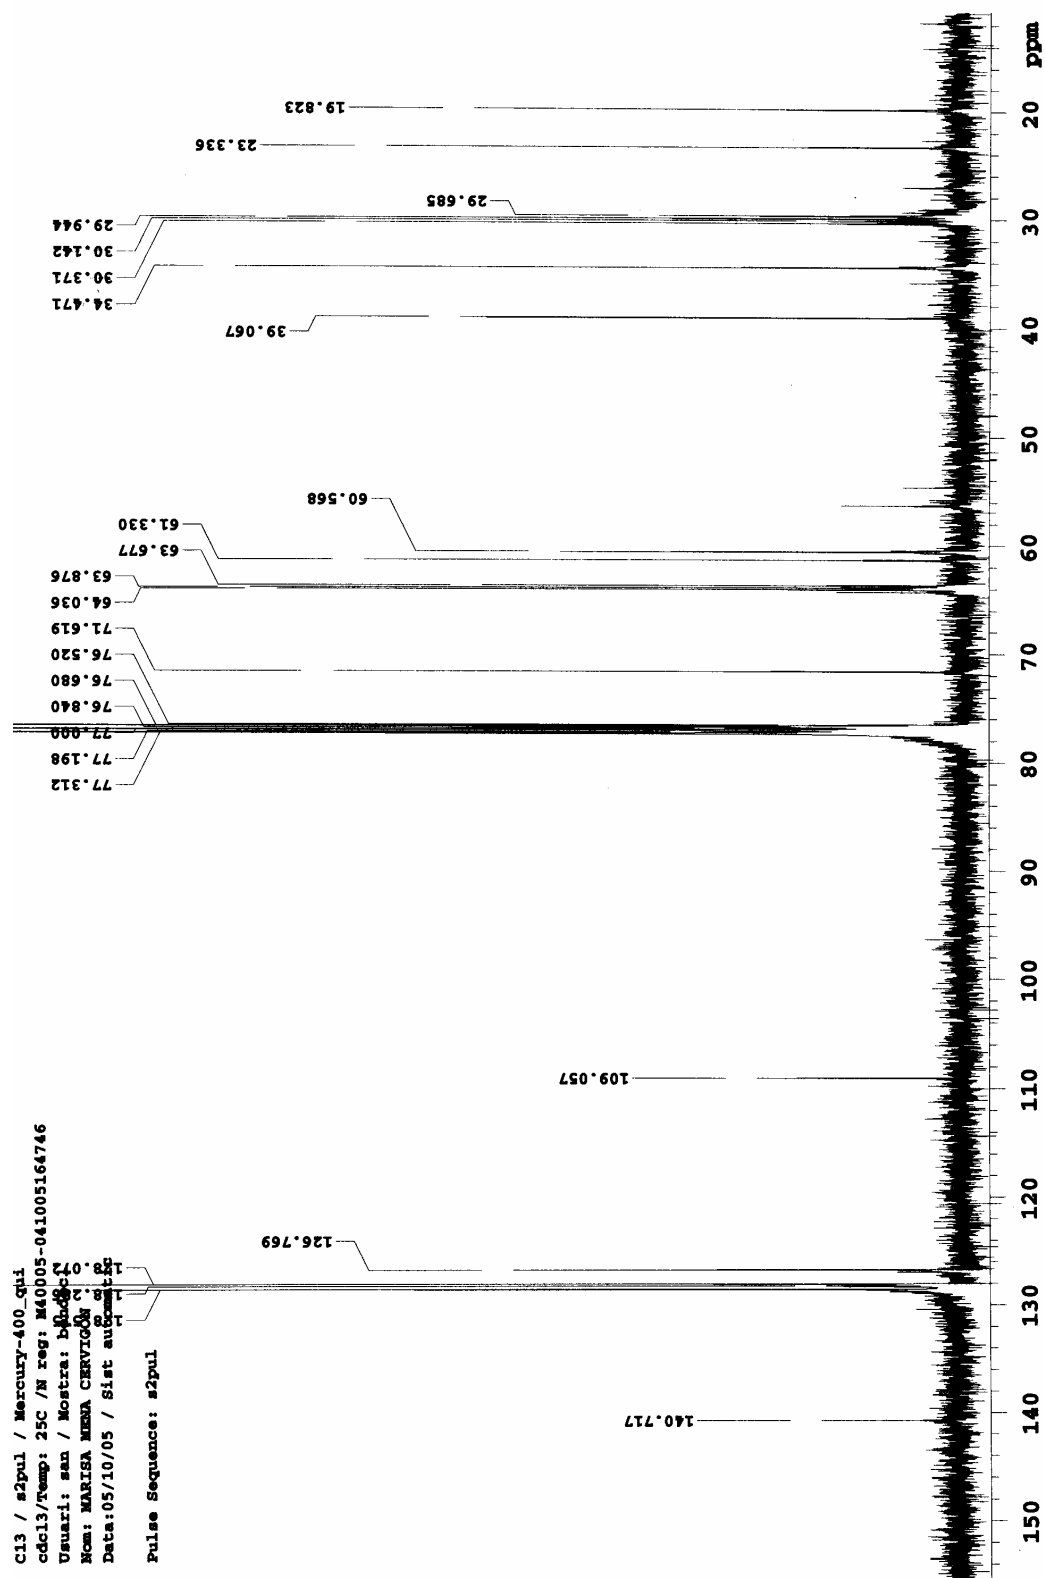

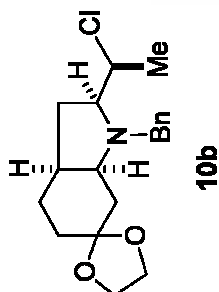

cdcl3/Temp: 25C /M reg: M40005-041005164

746

Usuari: san / Mostra: bendocl  
Nom: MARISA NENA CERVIGNON  
Data: 05/10/05 / Sist automatic

exp22 gCOSY

| SAMPLE              |                     | FLAGS         |          |
|---------------------|---------------------|---------------|----------|
| date                | Oct 5 2005          | hs            | nn       |
| solvent             | cdcl3               | sspul         | n        |
| sample              | auto_Custom- hsglv1 |               | 1002     |
| Q_04Oct2005 SPECIAL |                     |               |          |
| ACQUISITION         | temp                | 25.0          |          |
| sw                  | 6410.3              | gain          | 32       |
| at                  | 0.150               | spin          | 0        |
| np                  | 1924                | F2 PROCESSING |          |
| fb                  | not used            | sb            | -0.075   |
| ss                  | 16                  | sbs           | not used |
| dl                  | 1.000               | fn            | 2048     |
| nt                  | 4                   | F1 PROCESSING |          |
| 2D ACQUISITION      | sb1                 | -0.040        |          |
| sw1                 | 6410.3              | sbs1          | not used |
| nl                  | 256                 | procl         | lp       |
| PRESATURATION       | fn1                 | 2048          |          |
| satmode             | n                   | DISPLAY       |          |
| satfrq              | 0                   | sp            | -47.3    |
| satdly              | 0                   | wp            | 2011.4   |
| satpwr              | 0                   | sp1           | 234.6    |
| TRANSMITTER         | wp1                 |               | 1579.1   |
| tn                  | H1                  | rf1           | 799.3    |
| sfrq                | 400.114             | rfp           | 0        |
| tof                 | 381.9               | rf11          | 799.3    |
| tpwr                | 58                  | rfp1          | 0        |
| PW                  | 12.200              | PLOT          |          |
| GRADIENTS           | wc                  |               | 131.8    |
| gvlv11              | 1002                | sc            | 6.2      |
| gt1                 | 0.001000            | wc2           | 131.8    |
| gstab               | 0.000500            | sc2           | 0        |
| DECOUPLER           | vs                  |               | 252      |
| dn                  | C13                 | th            | 7        |
| dm                  | nmn                 | ai            | cdc      |
|                     |                     | av            |          |

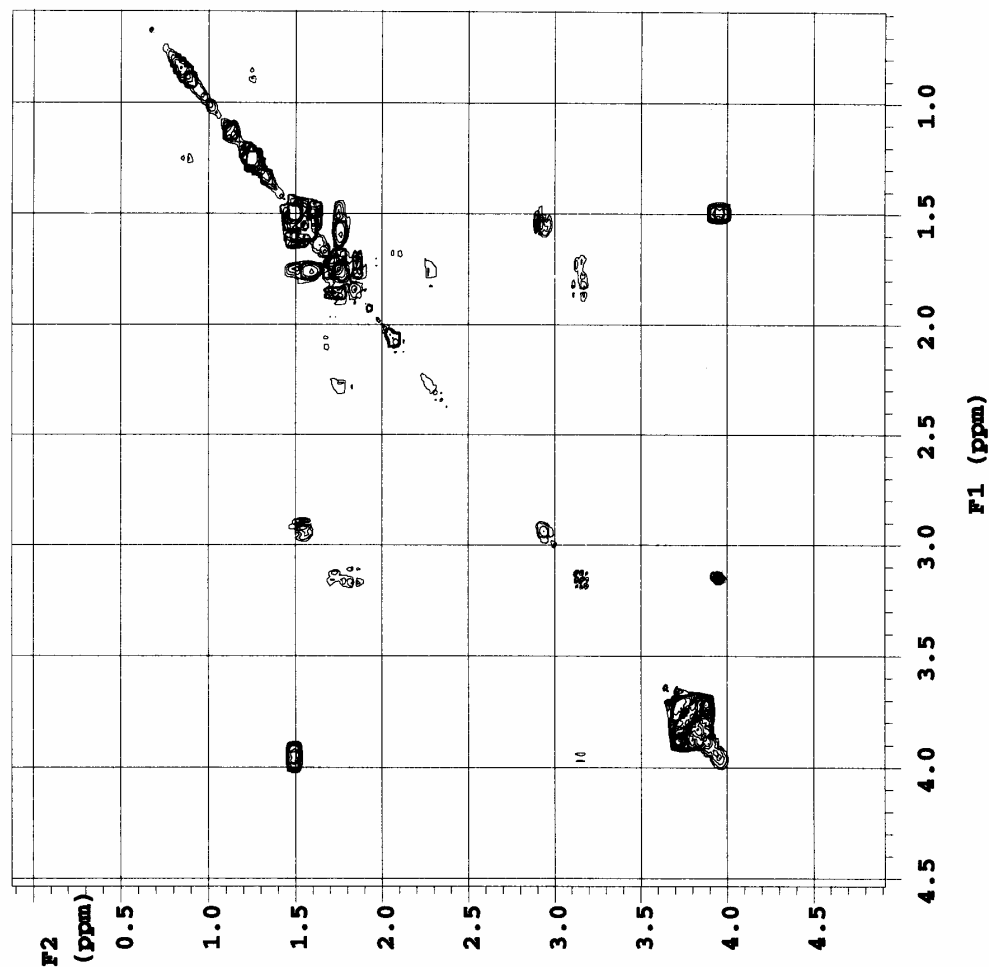

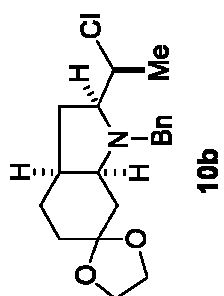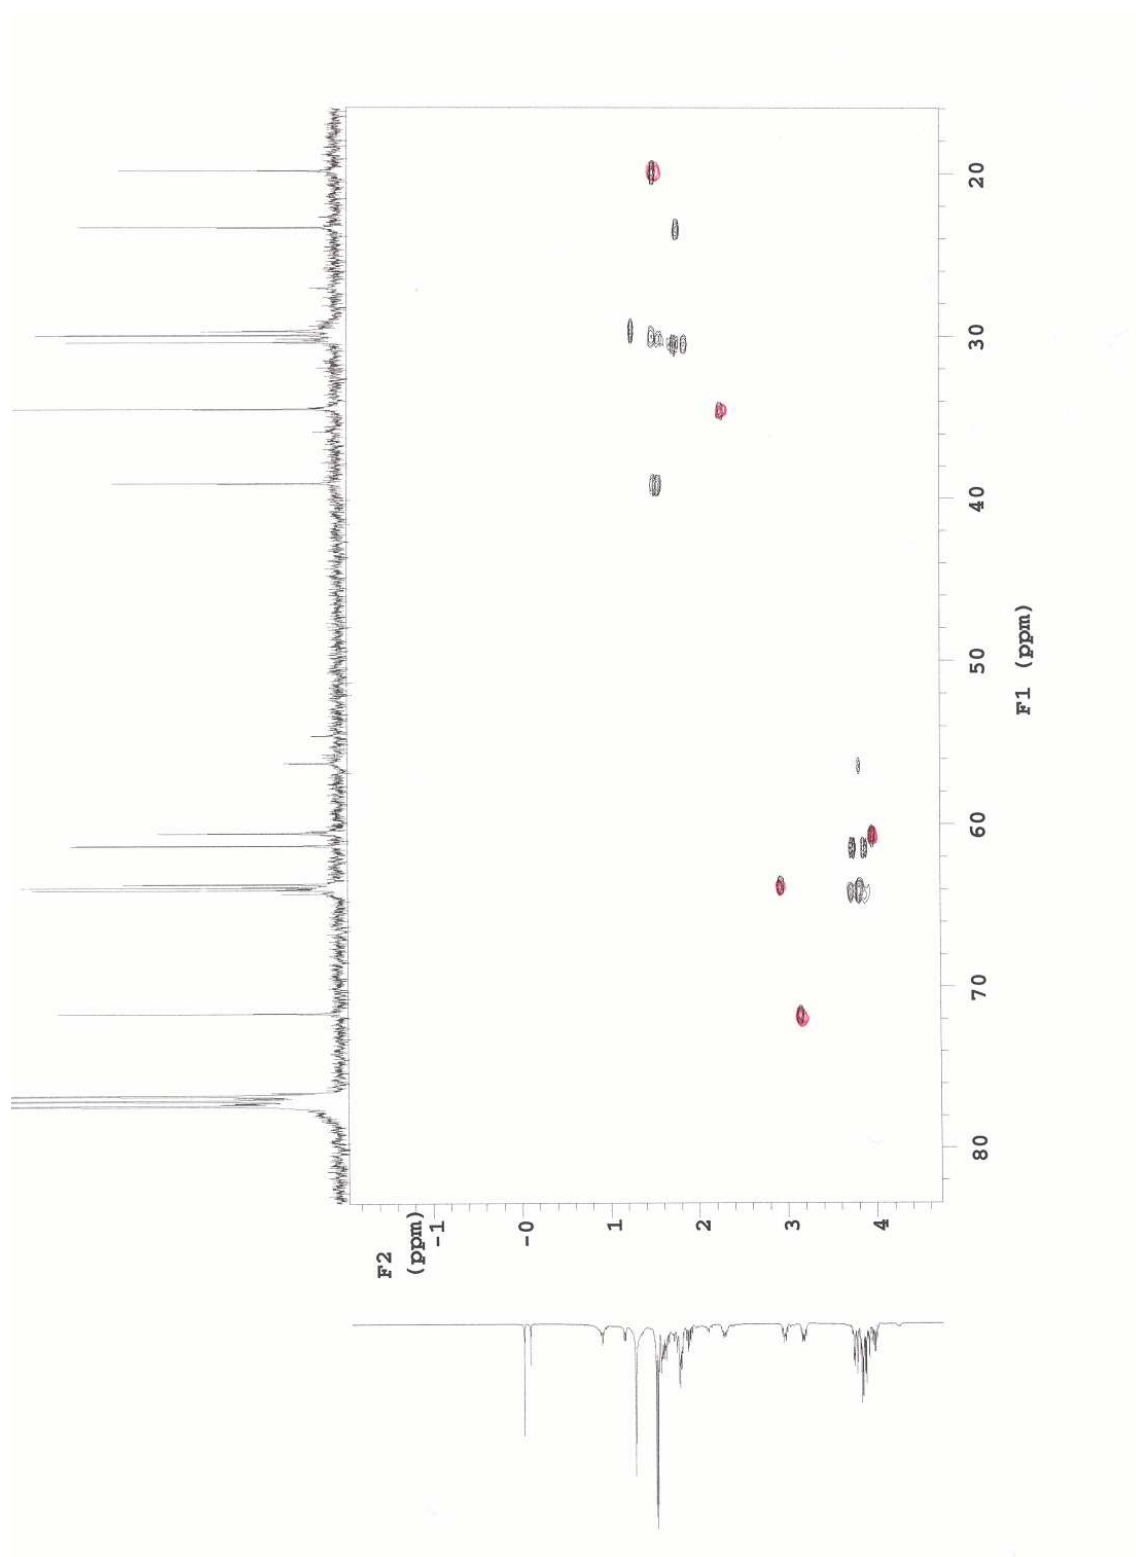

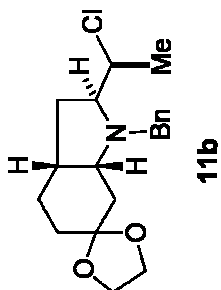

H1 / s2pul / Mercury-400\_qui  
 cdcl3/Temp: 25C /N reg: M40005-3705  
 Usuari: san J Mostra: aescocl  
 Nom: MARISA BENA CERVIGON  
 Data:19/10/05 / Sist automatic  
 Pulse Sequence: s2pul

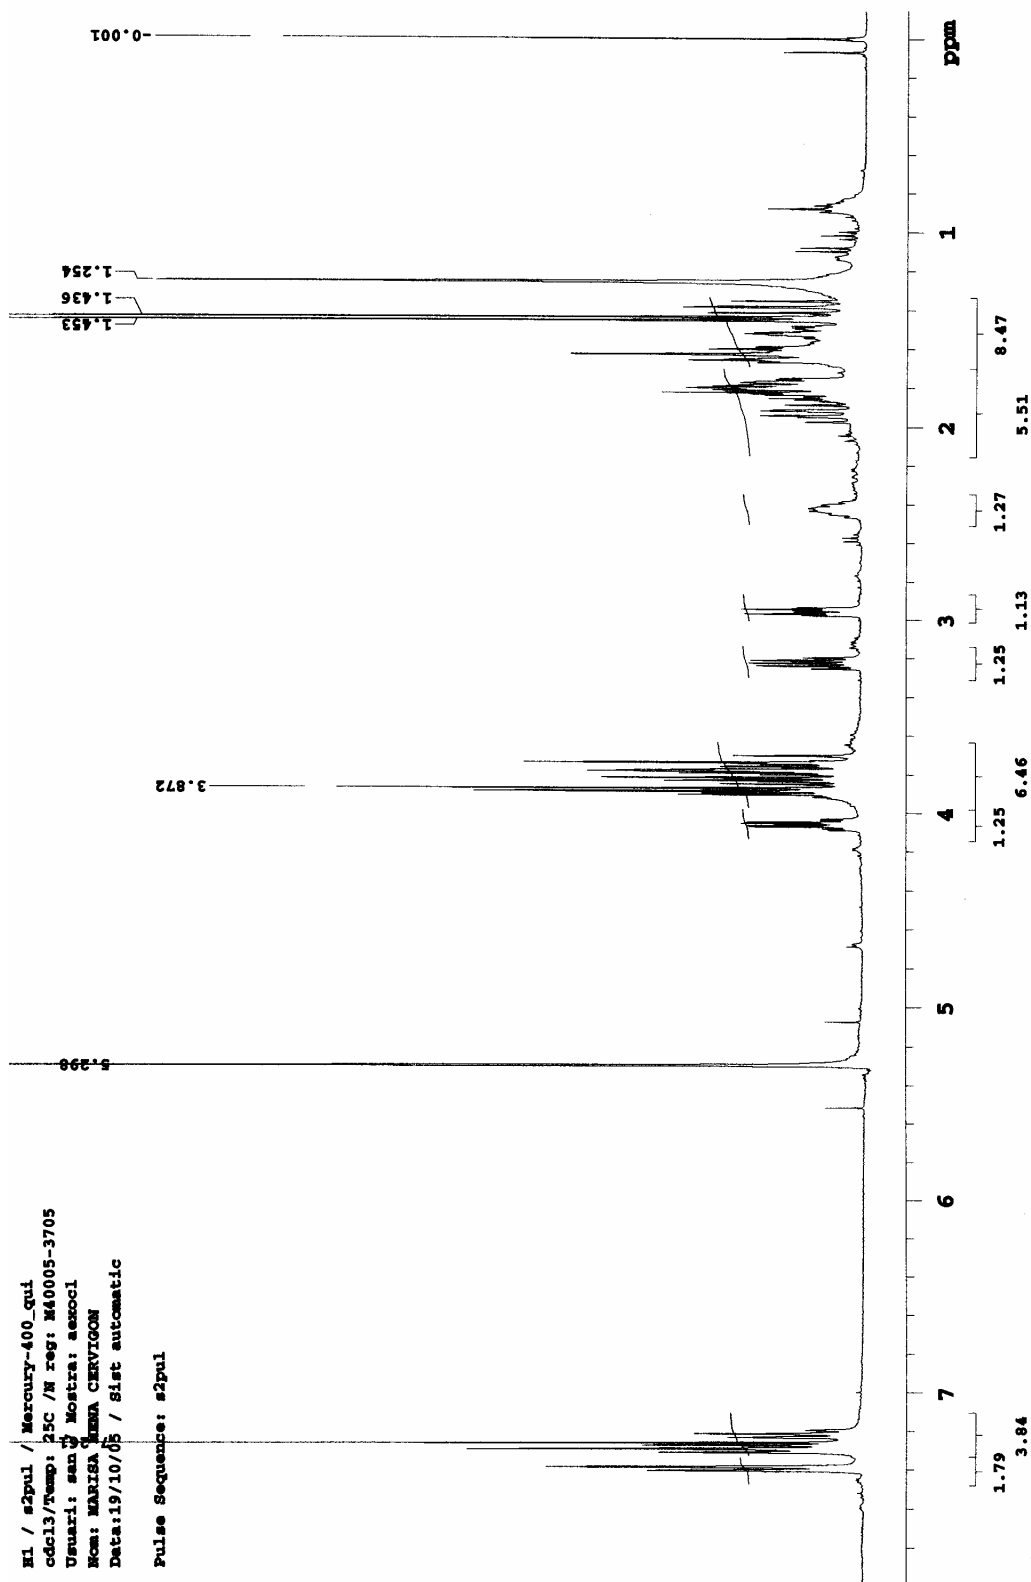

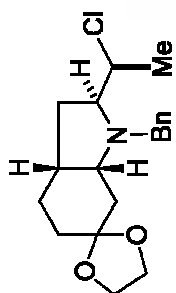

11b

C13 / s2pul / Mercury-400.qui  
 cdcl3/Temp: 25C /M reg: M40005-3705  
 Usuari: san / Mostra: s2pul  
 Nom: MARISA MENA CERVIGÓN  
 Data:19/10/05 / Sist aut:estic  
 Pulse Sequence: s2pul

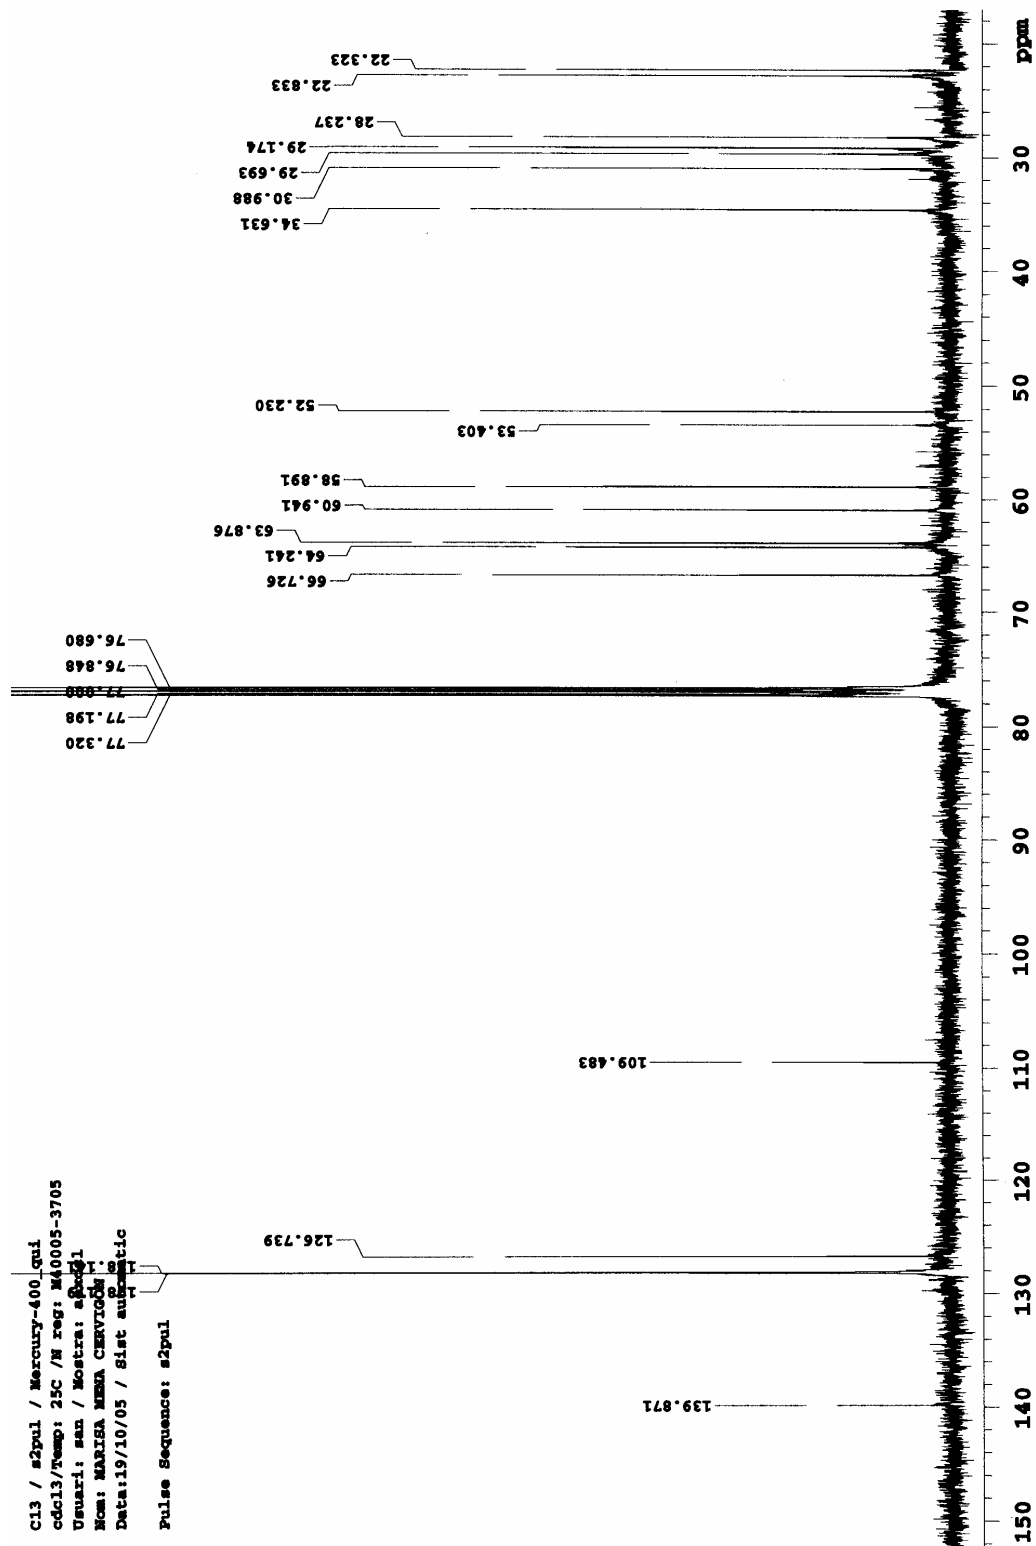

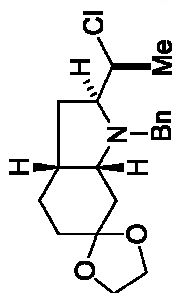

11b

H1 / gCOSY / Mercury-400\_qui  
 cdcl3/Temp: 25C /M reg: M40005-3705  
 Usuari: san / Mostra: aexocl  
 Nom: MARISA MENA CERVIGON  
 Data:19/10/05 / Sist automatic

exp4 gCOSY

| SAMPLE                    |                     | FLAGS         |          |
|---------------------------|---------------------|---------------|----------|
| date                      | Oct 19 2005         | hs            | nn       |
| solvent                   | cdcl3               | sepl          | n        |
| sample                    | auto Custom- hsglvi | 1002          |          |
| Q_19oct2005               | SPECIAL             |               |          |
| ACQUISITION temp 25.0     |                     |               |          |
| sw                        | 4273.5              | gain          | 26       |
| at                        | 0.150               | spin          | 0        |
| np                        | 1282                | F2 PROCESSING |          |
| fb                        | not used            | ab            | -0.075   |
| ss                        | 16                  | sbs           | not used |
| d1                        | 1.000               | fn            | 2048     |
| nt                        | 4                   | F1 PROCESSING |          |
| 2D ACQUISITION sb1 -0.060 |                     |               |          |
| sw1                       | 4273.5              | abs1          | not used |
| ni                        | 256                 | proc1         | lp       |
| PREPARATION fn1 2048      |                     |               |          |
| satmode n DISPLAY         |                     |               |          |
| satfrq                    | 0                   | sp            | 137.7    |
| satdly                    | 0                   | vp            | 1913.3   |
| satpr                     | 0                   | sp1           | 363.3    |
| TRANSMITTER wd1 1382.7    |                     |               |          |
| tn                        | H1                  | rf1           | 514.0    |
| sfrq                      | 400.113             | rfp           | 0        |
| tof                       | -400.6              | rf11          | 514.0    |
| tpwr                      | 58                  | rfp1          | 0        |
| pw 12.200 PLOT            |                     |               |          |
| GRADIENTS wc 131.8        |                     |               |          |
| gvlv1                     | 1002                | sc            | 6.2      |
| gt1                       | 0.001000            | vc2           | 131.8    |
| gstab                     | 0.000500            | sc2           | 0        |
| DECOUPLER vs 590          |                     |               |          |
| dn                        | C13                 | th            | 7        |
| dm                        | nm                  | ai            | cdc      |
|                           |                     |               | av       |

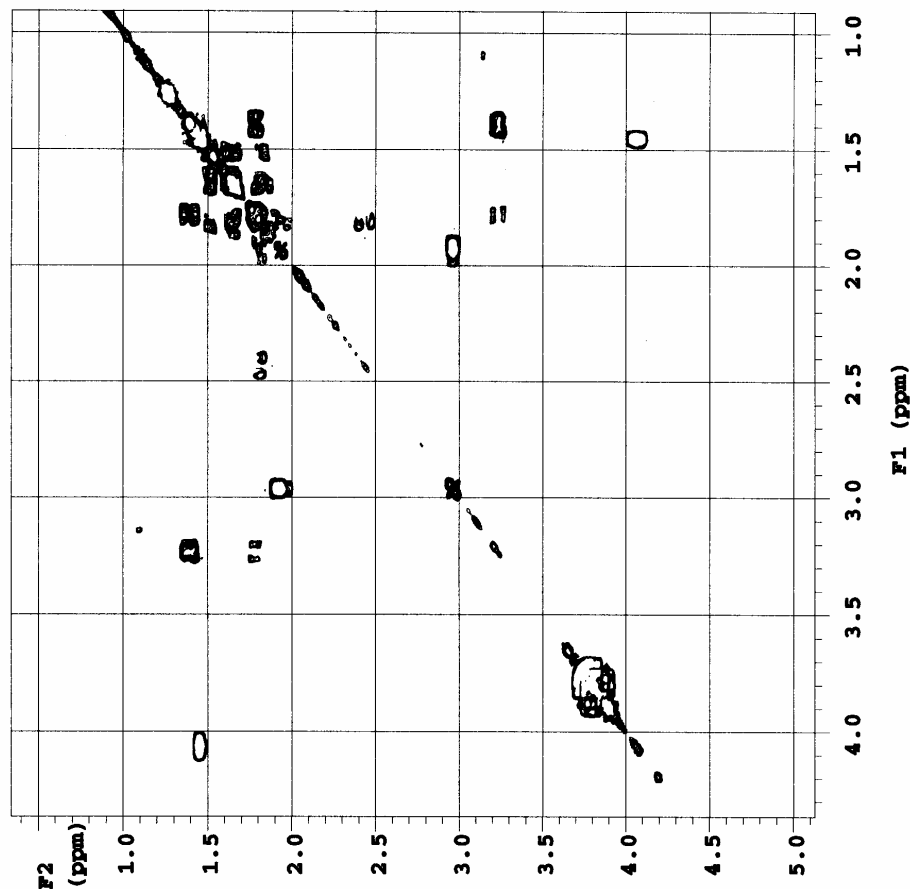



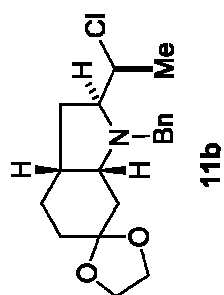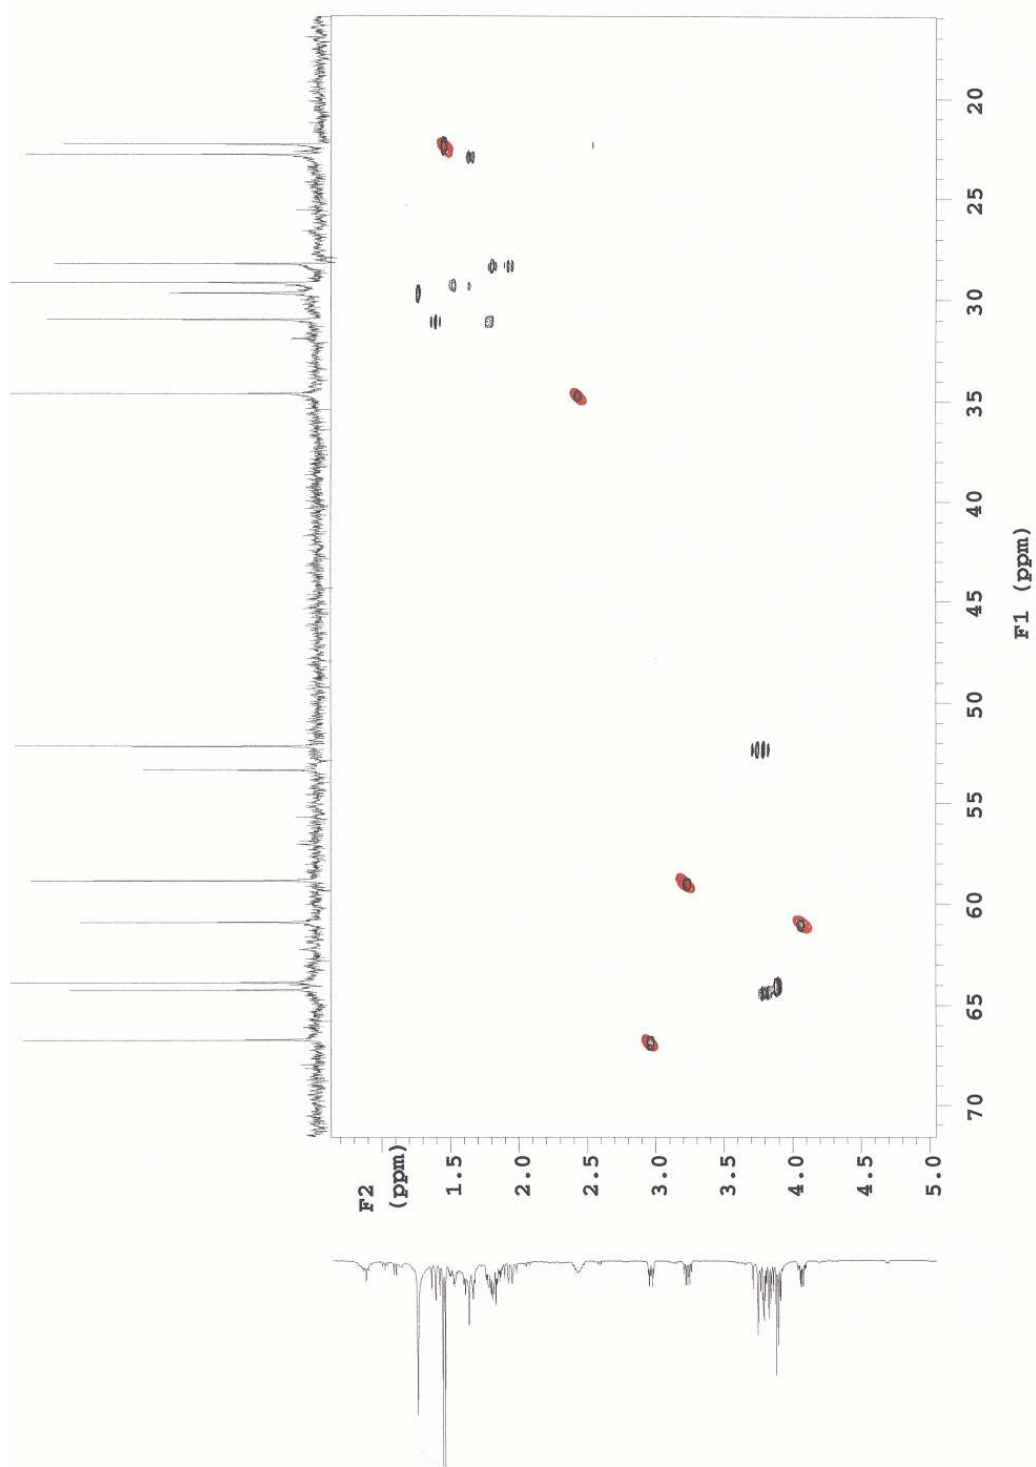

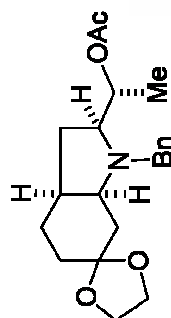

9c

H1 / s2pul / Mercury-400\_qui  
 cdc13/Temp: 25C / N reg: M40005-080905165649  
 Usuari: san / Nostra: hump42  
 Nom: MARISA MEMA CERVIGON  
 Data:08/09/05 / Sist automatic

Pulse Sequence: c13s2pul

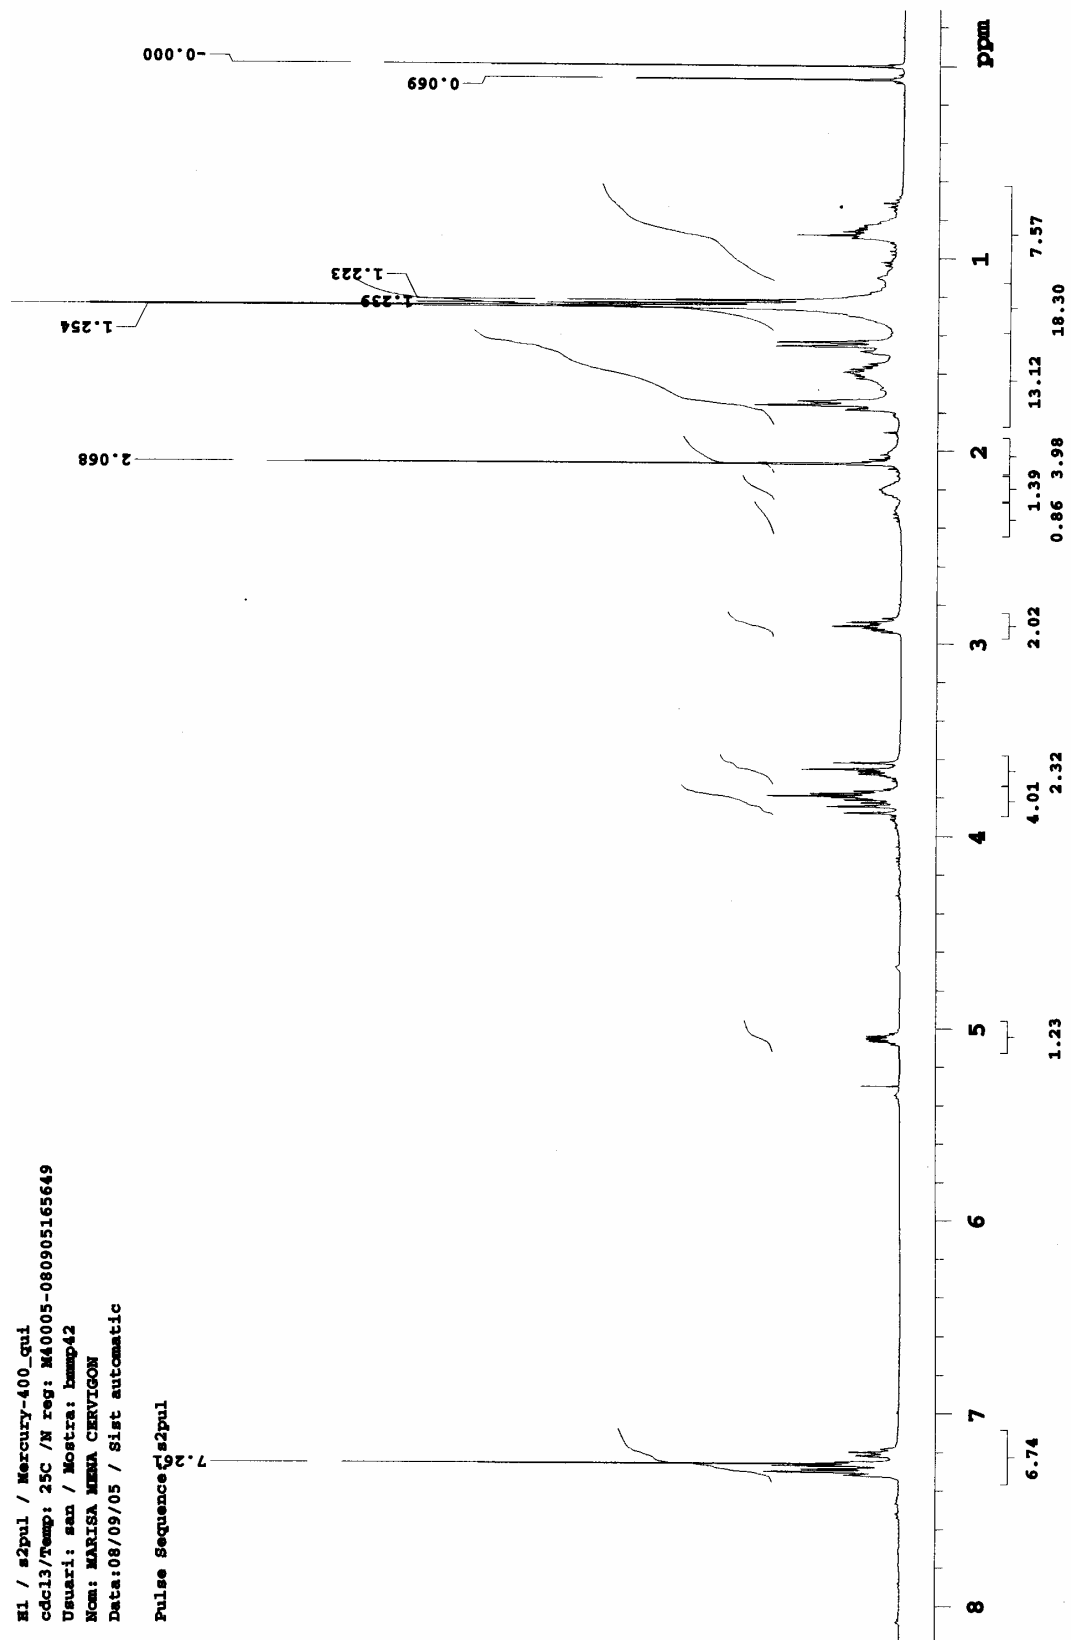

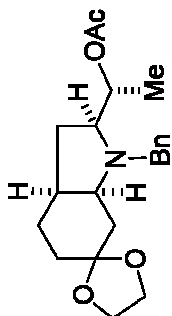

9c

C13 / s2pul / Mercury-400\_qui  
 cdcl3/Temp: 25C / N reg: M40005-080905165649  
 Usuari: san / Mostra: bump42  
 Nom: MARISA MENA CERVIGON  
 Data:08/09/05 / Siat automatic  
 Pulse Sequence: s2pul

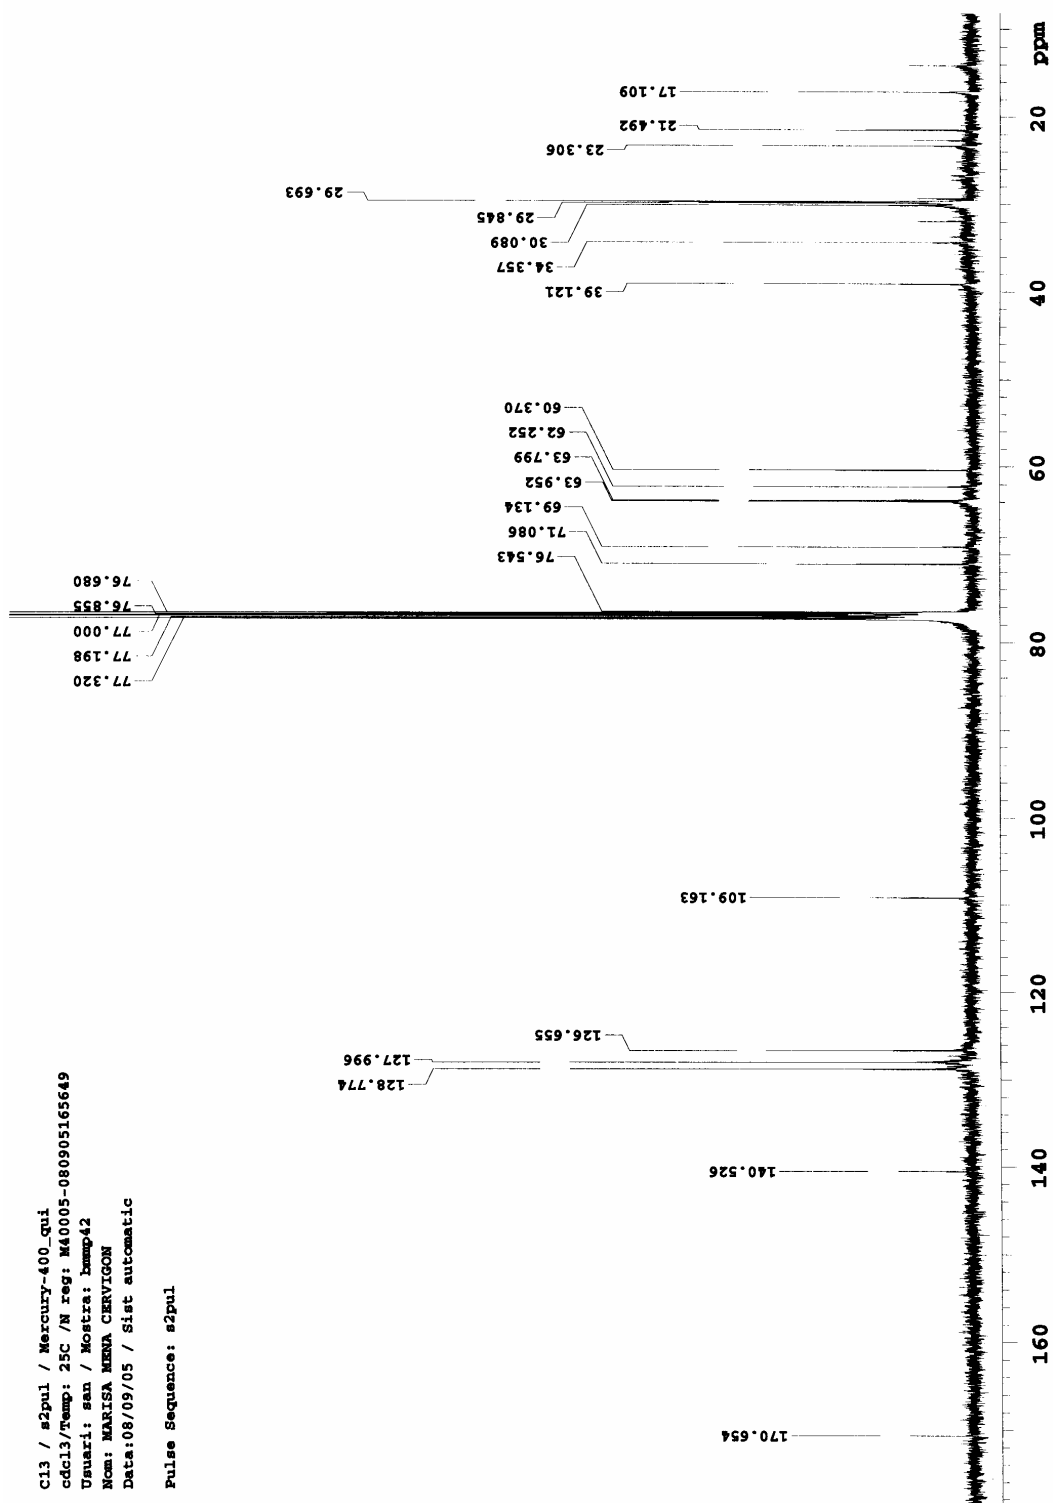

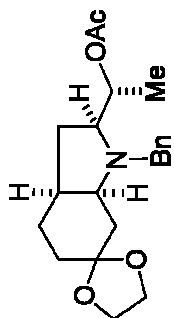

9c

H1 / gCOSY / Mercury-400.qui  
cdcl3/Tmp: 25C / N reg: M40005-290905163

622

Usuari: sen / Mostra: hmp42

MCm: MARISA MEMA CERVIQOM

Data:29/09/05 / Sist automatic

exp6 gCOSY

| SAMPLE                   | FLAGS              | nm       |
|--------------------------|--------------------|----------|
| date Sep 29 2005         | hs                 | nm       |
| solvent cdcl3            | sepul              | n        |
| sample auto_Custom-hsgly | 1002               |          |
| Q_29Sep2005              | SPECIAL            |          |
| ACQUISITION              | temp               | 25.0     |
| sw                       | 3906.2 gain        | 36       |
| at                       | 0.150 spin         | 0        |
| up                       | 1172 F2 PROCESSING |          |
| fb                       | not used ab        | -0.075   |
| ss                       | 16 sbs             | not used |
| dl                       | 1.000 fn           | 2048     |
| nt                       | 4 F1 PROCESSING    |          |
| 2D ACQUISITION           | abl                | -0.066   |
| sw1                      | 3906.2 sbs1        | not used |
| ni                       | 256 proc1          | lp       |
| PRESATURATION            | fn1                | 2048     |
| satmode                  | n                  | DISPLAY  |
| satfrq                   | 0 sp               | 21.1     |
| satdly                   | 0 wp               | 2329.2   |
| satpwr                   | 0 sp1              | 257.8    |
| TRANSMITTER              | wp1                | 1886.3   |
| tn                       | H1 rfl             | 483.0    |
| stfrq                    | 400.113 rfp        | 0        |
| tof                      | -556.0 rfl1        | 483.0    |
| tpwr                     | 58 rfp1            | 0        |
| pw                       | 12.200             | PLOT     |
| GRADIENTS                | wc                 | 131.8    |
| gslv11                   | 1002 sc            | 6.2      |
| gt1                      | 0.001000 wc2       | 131.8    |
| gstab                    | 0.000500 sc2       | 0        |
| DECOUPLER                | vs                 | 1677     |
| dn                       | C13 th             | 8        |
| dm                       | nmn al             | cdc av   |

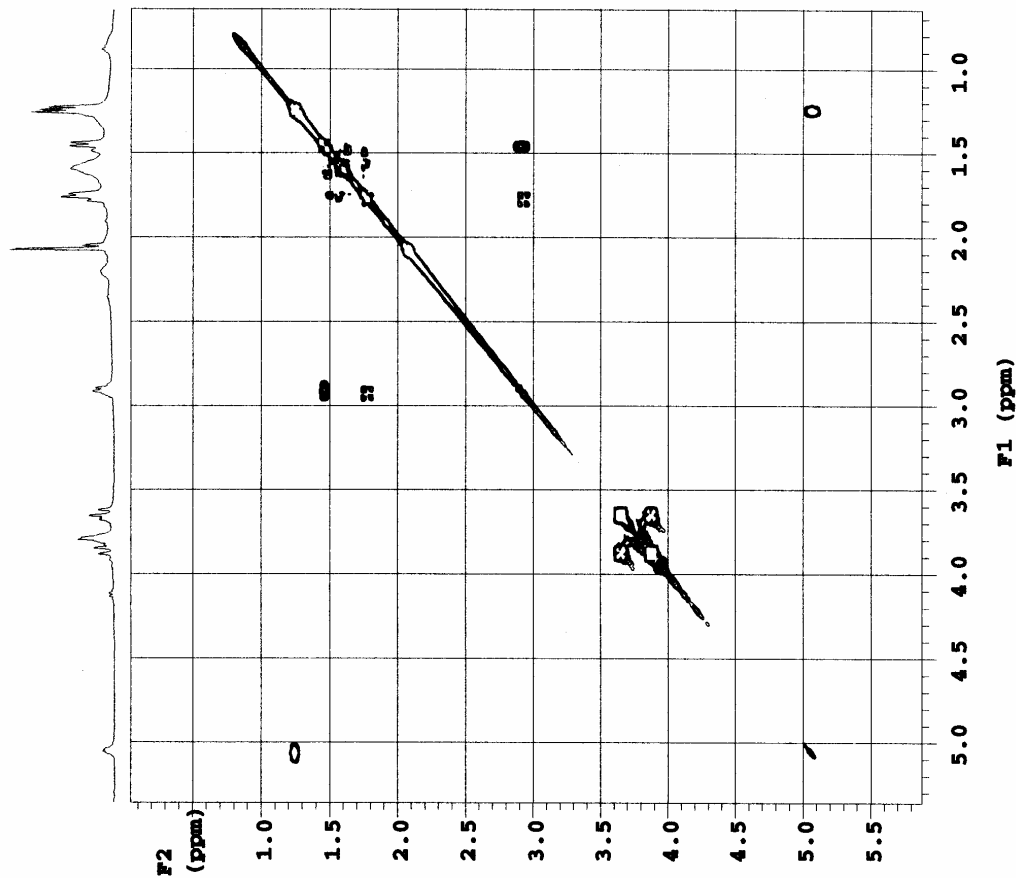

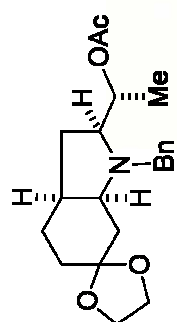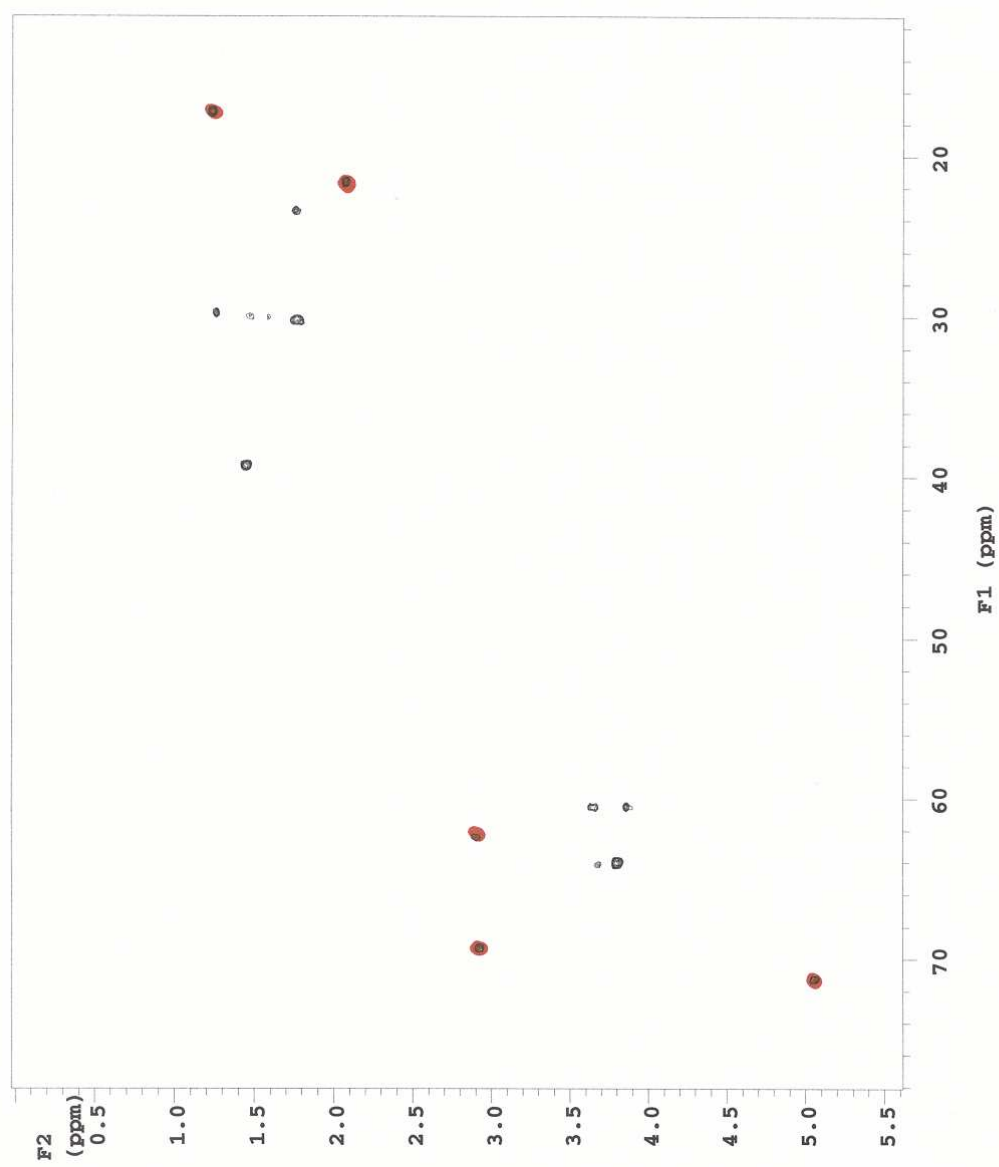

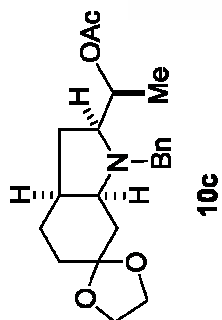

H1 / s2pul / Mercury-400\_qul  
 cdcl3/Temp: 25C / N reg: M40005-051005174318  
 Usuari: san / Maestra: bump15  
 Nom: MARISA MENA CERVIGON  
 Data:06/10/05 / Sist automatic  
 Pulse Sequence: s2pul

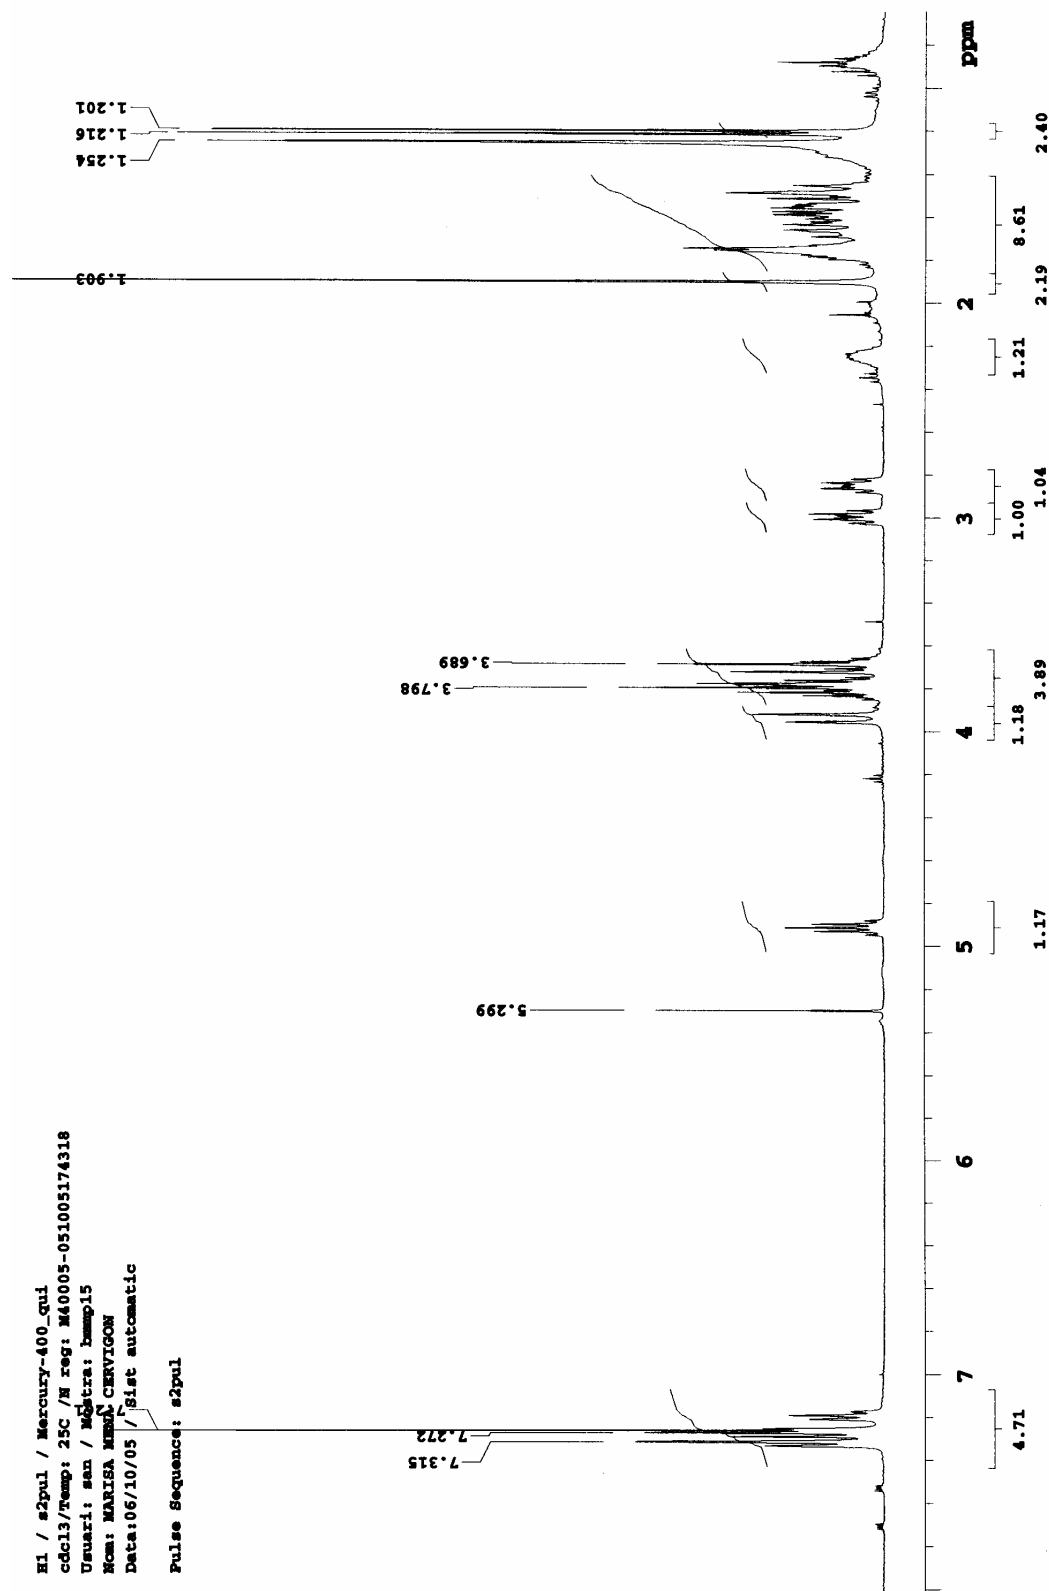

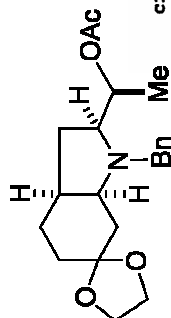

10c

C13 / s2pul / Gemini-300A  
 cdcl3/Temp: 25C / W reg: PCHE40206180825  
 Uruari: san / Mostra: mmc504  
 Nom: MARISA MENA CERVIJON  
 Data:14/02/06 / Sist automatic  
 Pulse Sequence: s2pul

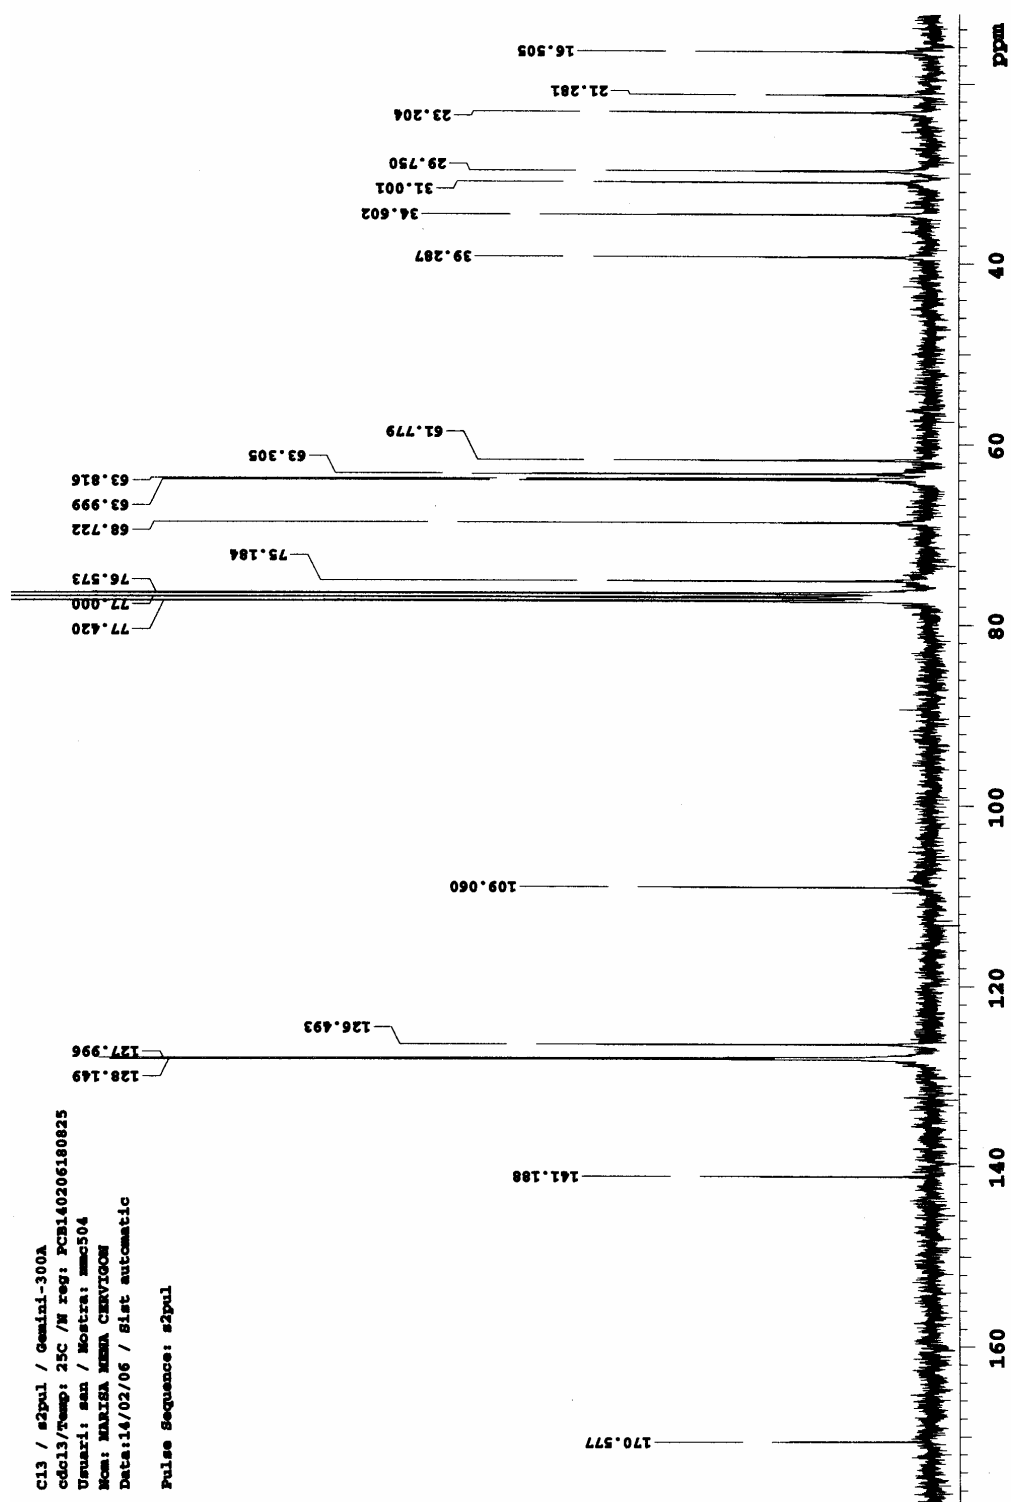

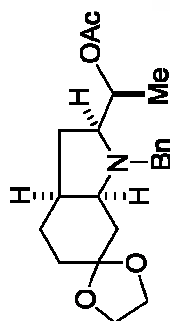

10c

H1 / gCOSY / Mercury-400\_qui  
cdcl3/Tmp: 25C /W reg: M40005-051005174  
318

Usuari: san / Mostra: hamp15  
Nom: MARISA MENA CERVIQON  
Data:06/10/05 / Sist automatic

exp22 gCOSY

| SAMPLE              |                    | FLAGS         |          |
|---------------------|--------------------|---------------|----------|
| date                | Oct 6 2005         | hs            | nn       |
| solvent             | cdcl3              | sepul         | n        |
| sample              | auto_Custom- hsgl1 | 1002          |          |
| Q_06Oct2005 SPECIAL |                    |               |          |
| ACQUISITION         |                    | temp          | 25.0     |
| sw                  | 4065.0             | gain          | 26       |
| at                  | 0.150              | spin          | 0        |
| np                  | 1220               | F2 PROCESSING |          |
| fb                  | not used           | sb            | -0.075   |
| ss                  | 16                 | sbs           | not used |
| dl                  | 1.000              | fn            | 2048     |
| nt                  | 8                  | F1 PROCESSING |          |
| 2D ACQUISITION      |                    | sb1           | -0.063   |
| sw1                 | 4065.0             | sbs1          | not used |
| ni                  | 256                | procl         | lp       |
| PRESATURATION       |                    | fn1           | 2048     |
| satmode n DISPLAY   |                    |               |          |
| satfrq              | 0                  | sp            | 102.2    |
| satdly              | 0                  | wp            | 2014.6   |
| satpwr              | 0                  | sp1           | 189.6    |
| TRANSMITTER         |                    | wp1           | 1875.6   |
| tn                  | H1                 | xf1           | 497.8    |
| sfrq                | 400.113            | rfp           | 0        |
| tof                 | -479.0             | rf11          | 497.8    |
| tpwr                | 58                 | rfp1          | 0        |
| PLOT                |                    |               |          |
| GRADIENTS           |                    | wc            | 131.8    |
| gzlv11              | 1002               | sc            | 6.2      |
| gt1                 | 0.001000           | wc2           | 131.8    |
| gstab               | 0.000500           | sc2           | 0        |
| DECOUPLER           |                    | vs            | 365      |
| dn                  | C13                | th            | 5        |
| dm                  | nm                 | ai            | cdc      |
|                     |                    | av            |          |

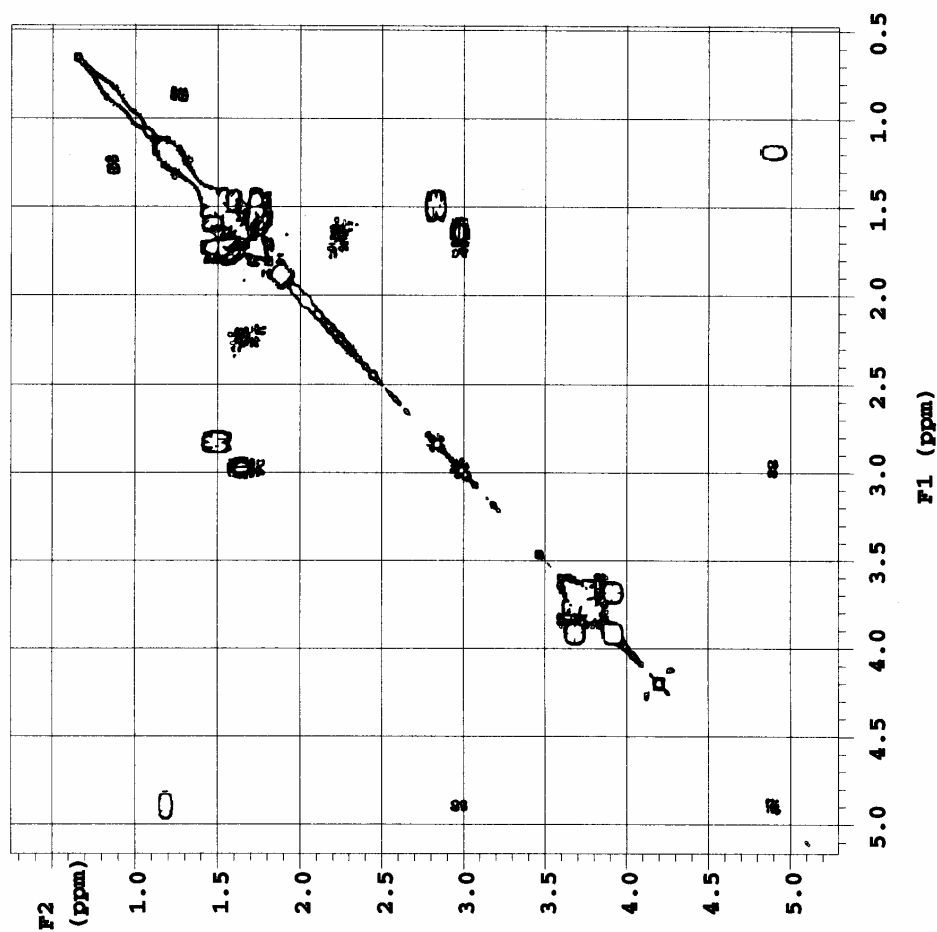



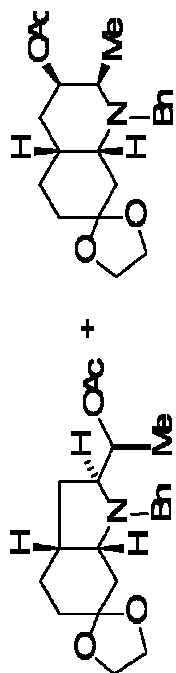

11c

19

H1 / s2pul / Mercury-400.qui  
 cdcl3/Temp: 25C /N reg: M40005-261005164903  
 Usuari: san / Mostra: sexooac  
 Nom: MARISSA MESA CERVIGON  
 Data:26/10/05 / Sist automatic

Pulse Sequence: s2pul

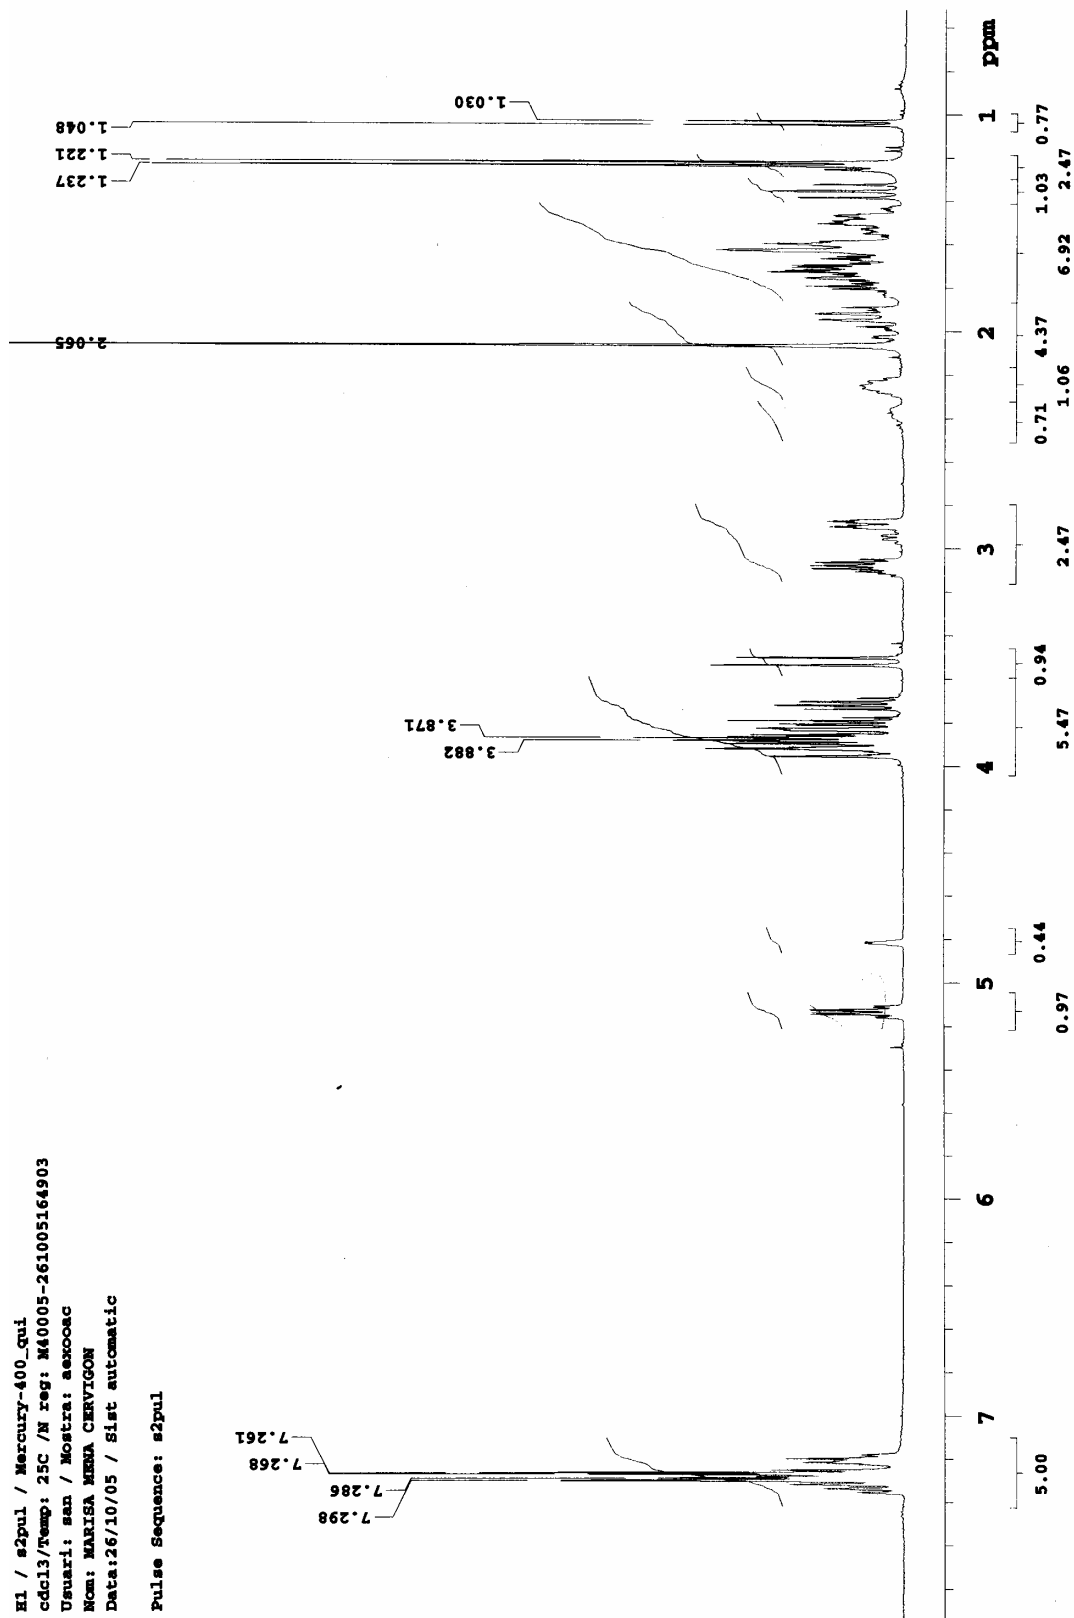

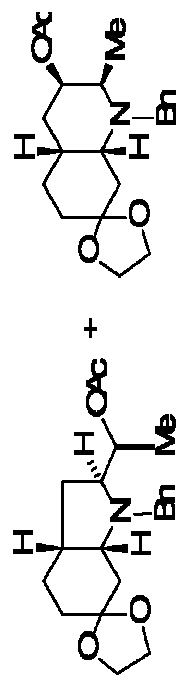

11c

19

C13 / s2pul / Mercury-400\_qui  
 cdc13/Temp: 25C /N reg: M4005-261005164903  
 Usuari: san / Mostra: sexocac  
 Nom: MARISA MENA CERVIGON  
 Data:26/10/05 / Sist automatic  
 Pulse Sequence: s2pul

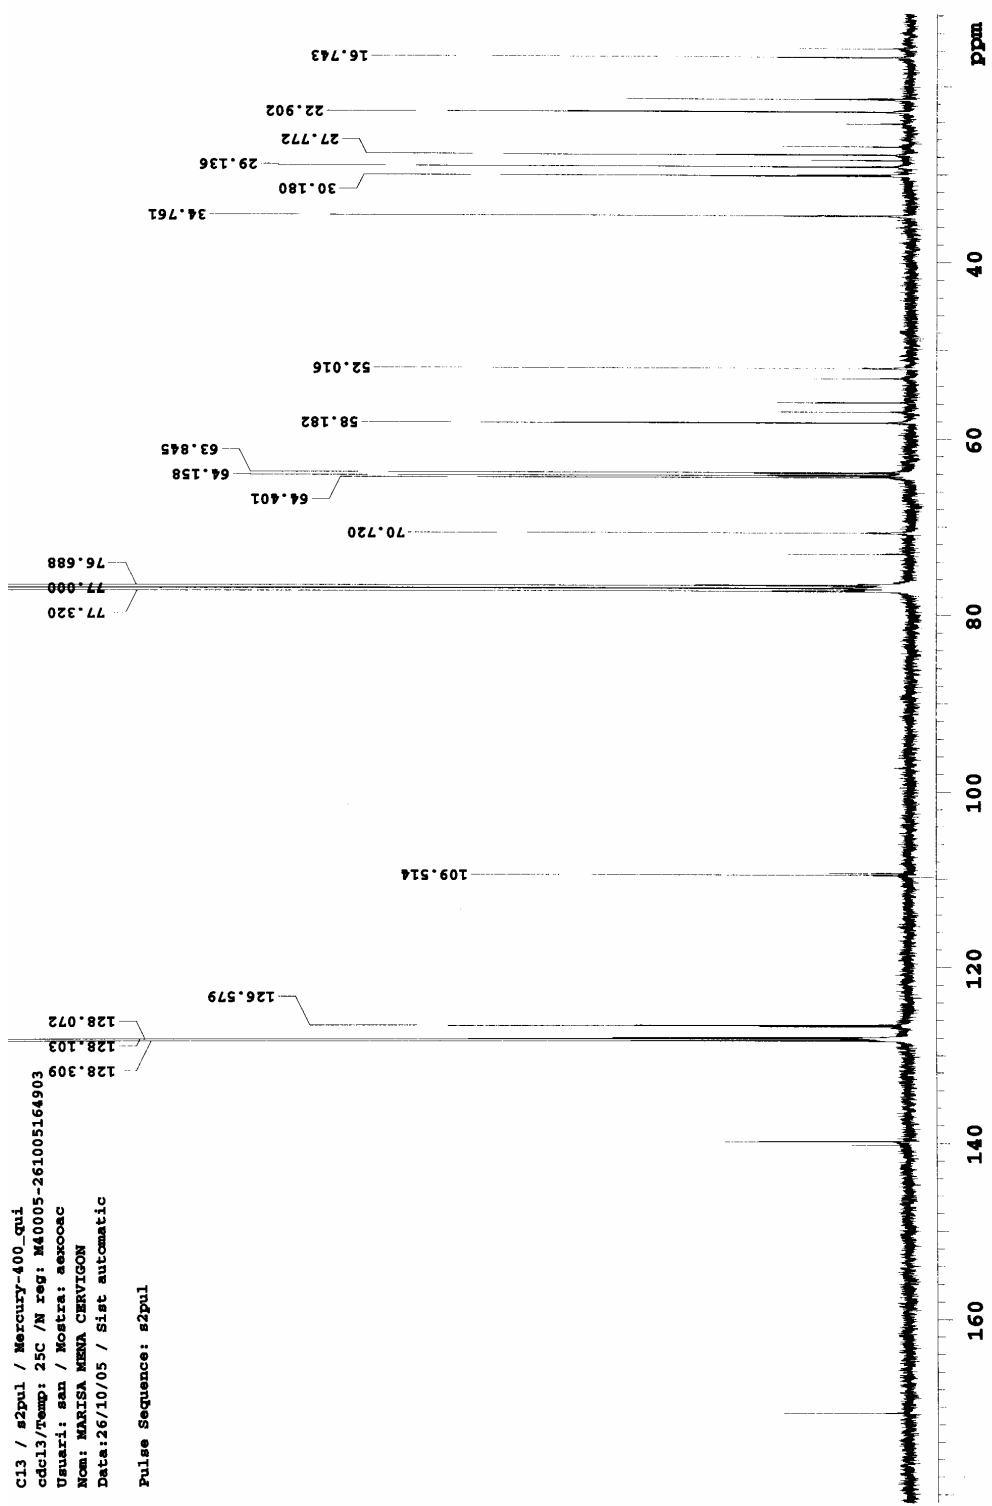



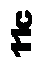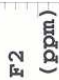

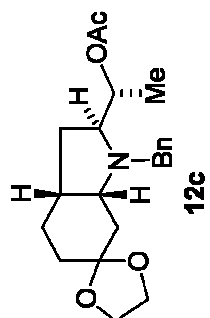

cdc13/Temp: 25C /N reg: M40005-261005165718  
 Usuari: san / Nostra: bexooac  
 Nom: MARISA MENA CERVIGON  
 Data:26/10/05 / Sist automatic  
 Pulse Sequence: s2pul

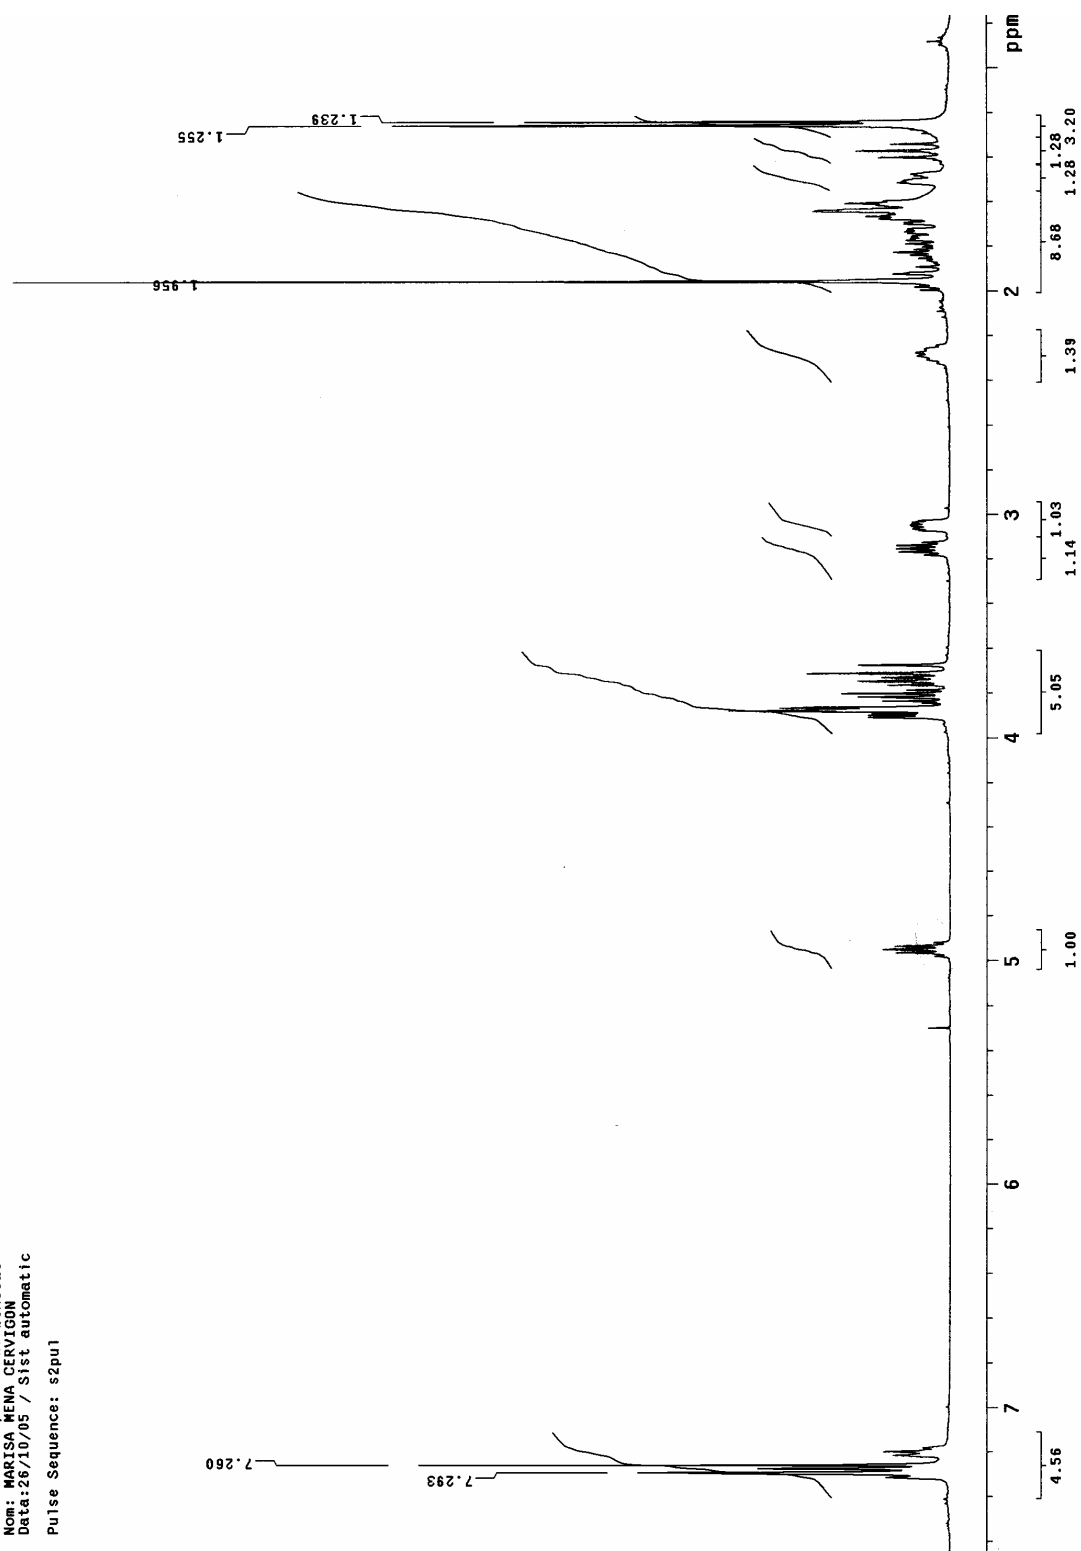

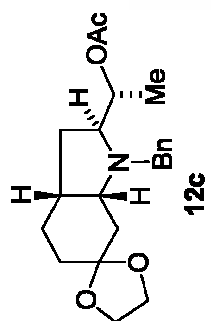

cdc13/Temp: 25C /N req: M40005-261005165718  
 Usuari: san / Mostra: bexooac  
 Nom: MARISA MENA CERVIGON  
 Data: 27/10/05 / Sist automatic  
 Pulse Sequence: s2pul1

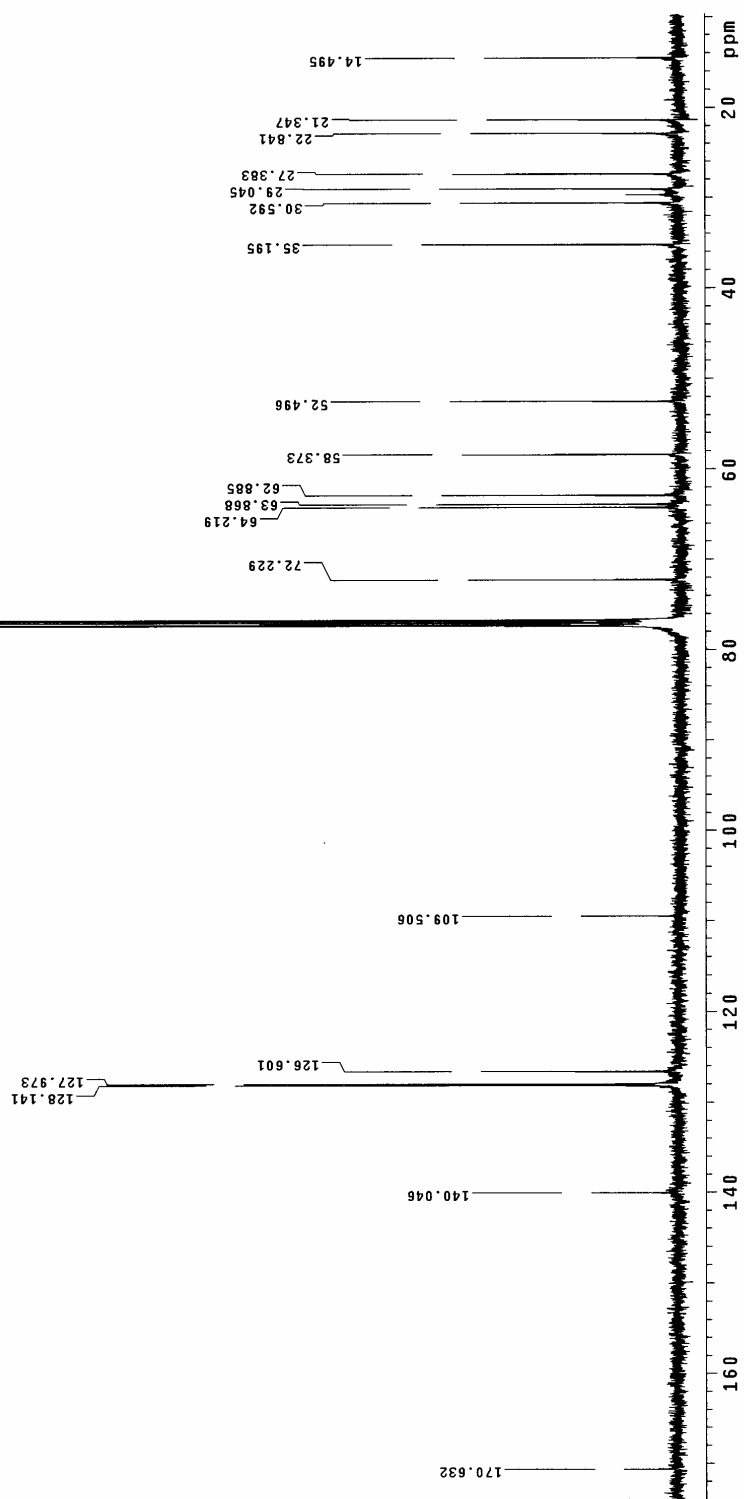

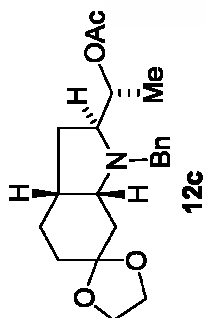

H1 / gCOSY / Mercury-400\_rui  
 cdc13/Temp: 25C /N reg: M40005-261005165  
 718  
 Usuari: san / Mostra: bexooac  
 Nom: MARISA MENA CERVIGON  
 Data: 27/10/05 / Sist automatic  
 exp4 gCOSY

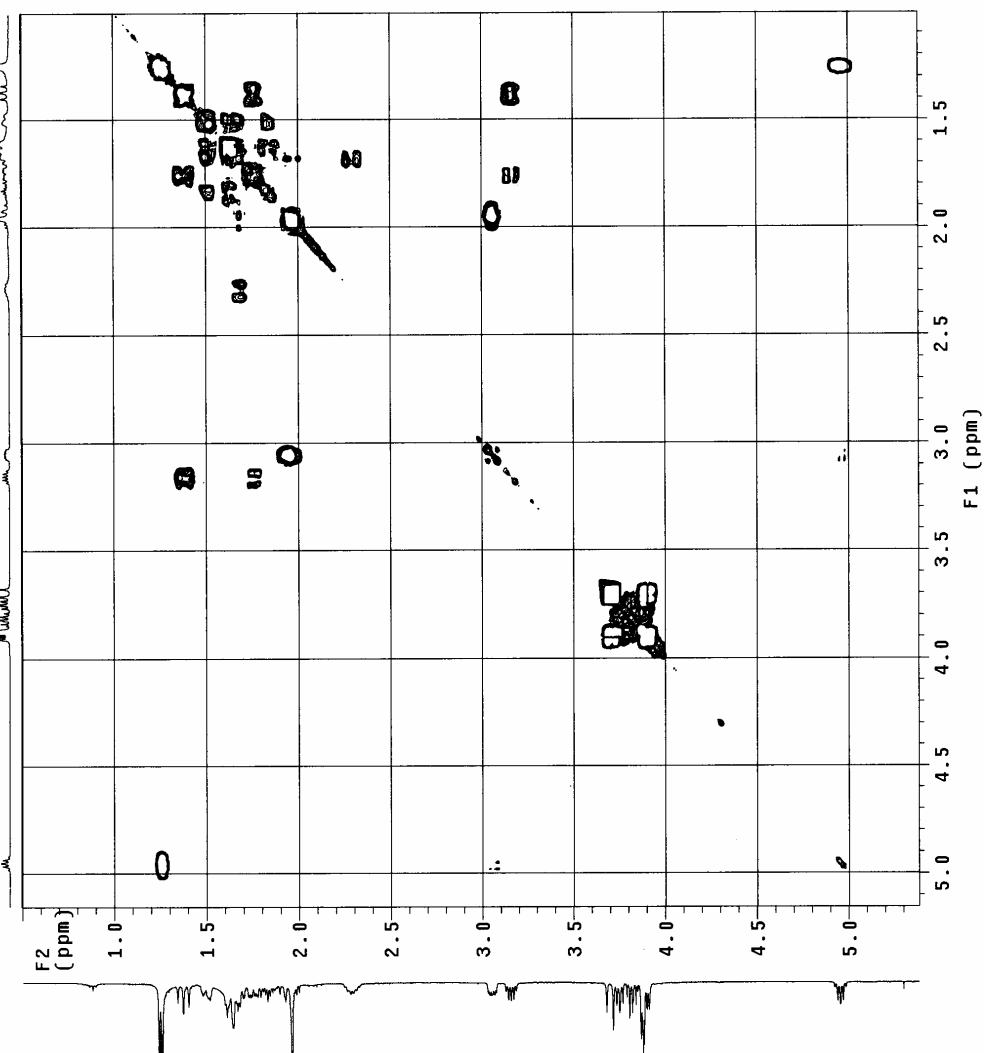

| SAMPLE         |             | FLAGS   |            |
|----------------|-------------|---------|------------|
| date           | Oct 27 2005 | hs      | nn         |
| solvent        | cdc13       | sspl    | n          |
| sample         | autoCustom~ | hsgl    | 1000       |
| Q_26Oct2005    |             | SPECIAL | 25.0       |
| ACQUISITION    |             |         |            |
| sw             | 333.7       | 0       | gdn        |
| at             | 0.150       | sp1     | 28         |
| nb             | 1182        | sp1     | 0          |
| fb             | not used    | sb      | -0.075     |
| ss             | 16          | sbs     | not used   |
| di             | 1.000       | fn      | 2048       |
| nt             | 4           | f1      | PROCESSING |
| 2D ACQUISITION | 0           | sb1     | -0.065     |
| sw1            | 333.7       | 0       | sdsl       |
| nt             | 256         | sp1     | not used   |
| PRESATURATION  | 0           | fn1     | 2048       |
| satmode        | n           | DISPLAY |            |
| satfrq         | 0           | sp      | 133.0      |
| satdly         | 0           | wp      | 1355.0     |
| satpwr         | 0           | sp1     | 402.9      |
| TRANSMITTER    |             |         |            |
| trnq           | 400.113     | rf1     | 1658.7     |
| trnf           | 400.113     | rf1     | 486.1      |
| tof            | -533.5      | rf1     | 486.1      |
| tpwr           | 58          | rfp1    | 0          |
| GRADIENTS      |             |         |            |
| pw             | 12.300      | wc      | 153.0      |
| g2lv11         | 1000        | sc      | 6.2        |
| g1             | 0.001000    | wc2     | 153.0      |
| gstab          | 0.000500    | sc2     | 0          |
| dn             | DECOUPLER   | c13     | 333        |
| dm             | nnn         | a1      | cdc        |
|                |             | av      | 7          |

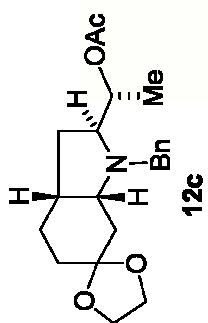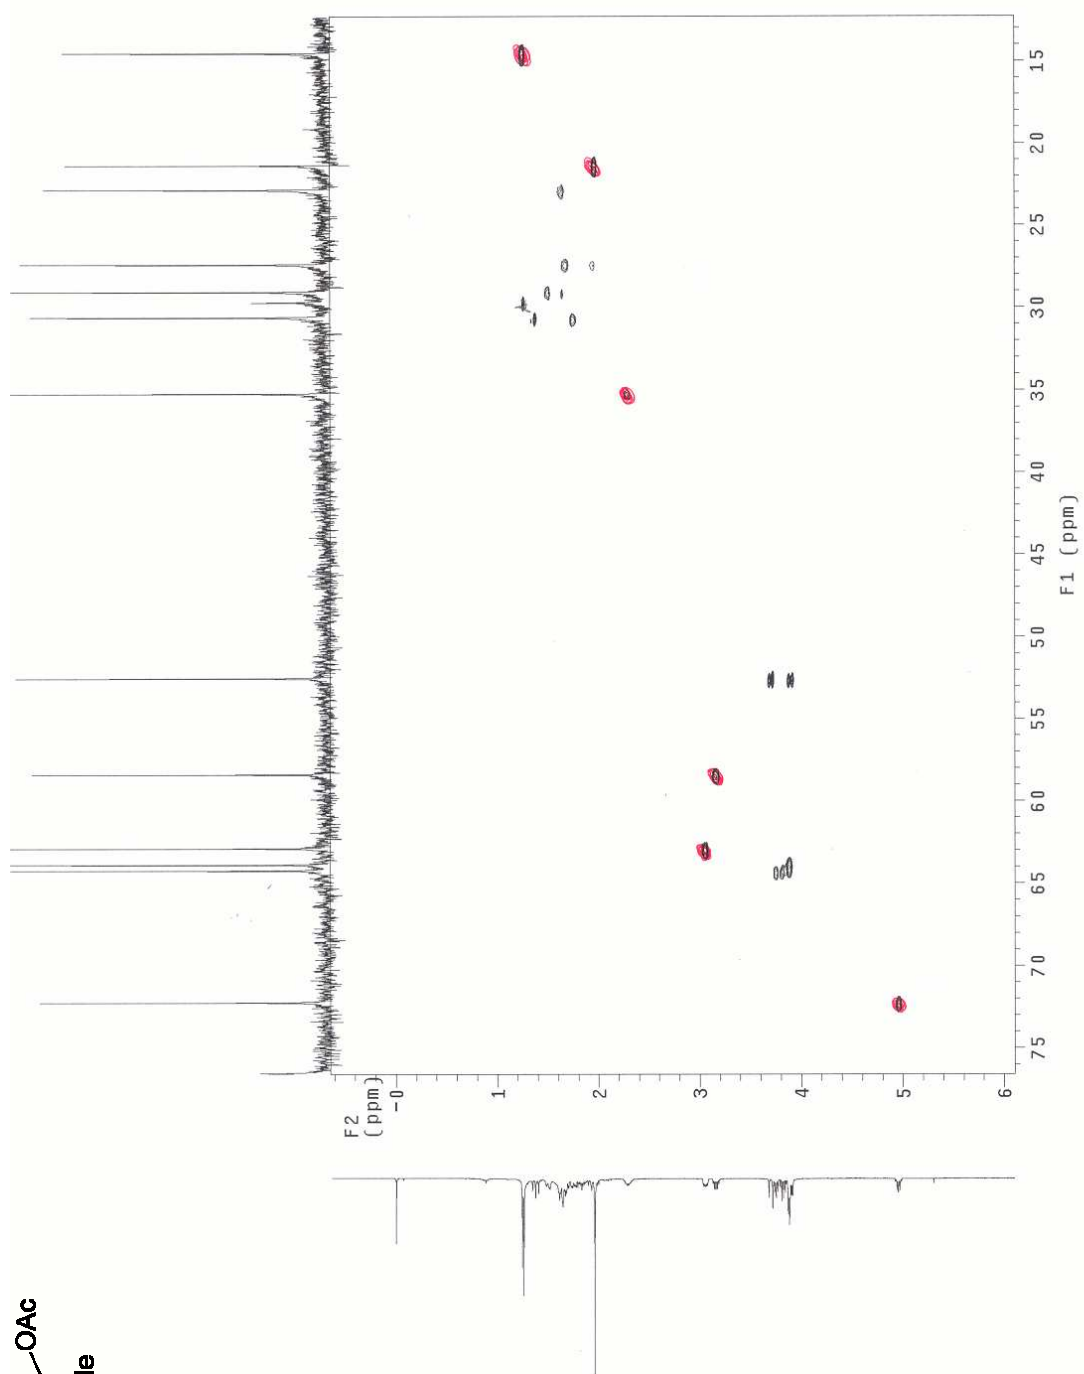



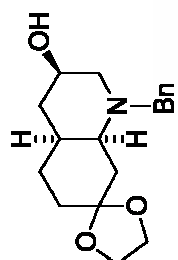

13

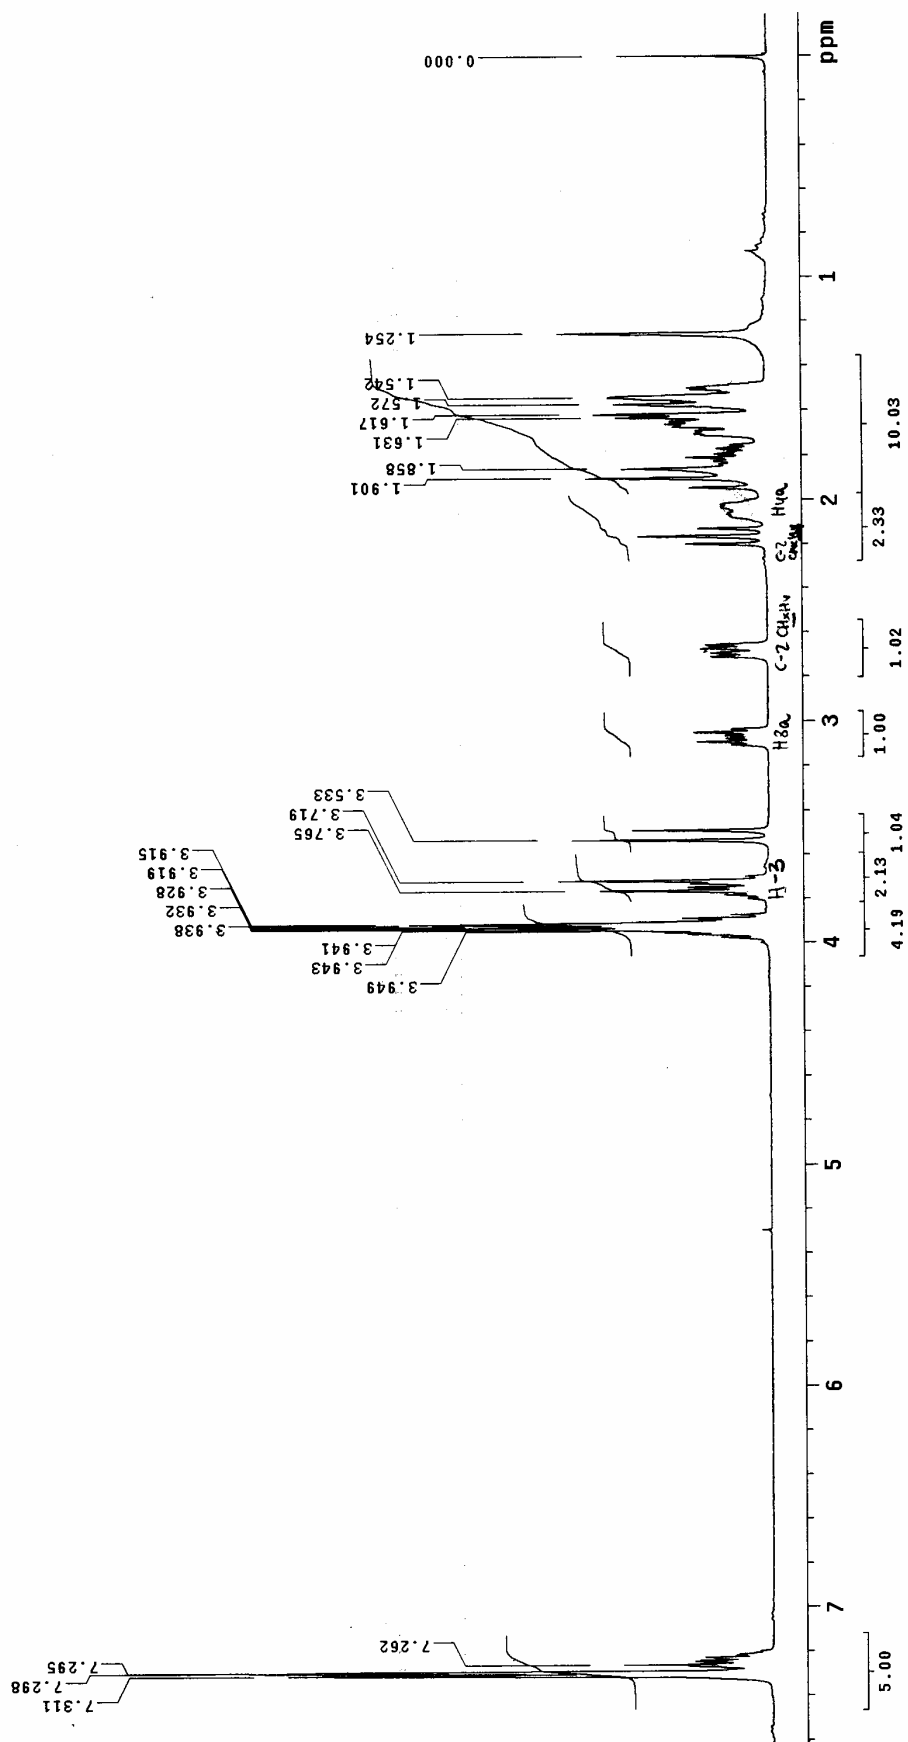

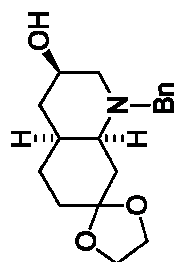

13

C13 / s2pul / Gemini-300A  
 cdcl3/Temp: 25C / W reg: PCB160206181245  
 Usuari: san / Mod: mmo36p  
 Nom: MARISA MARIA CAS/100M  
 Data: 17/02/06 / 25C automatic  
 Pulse Sequence: s2pul

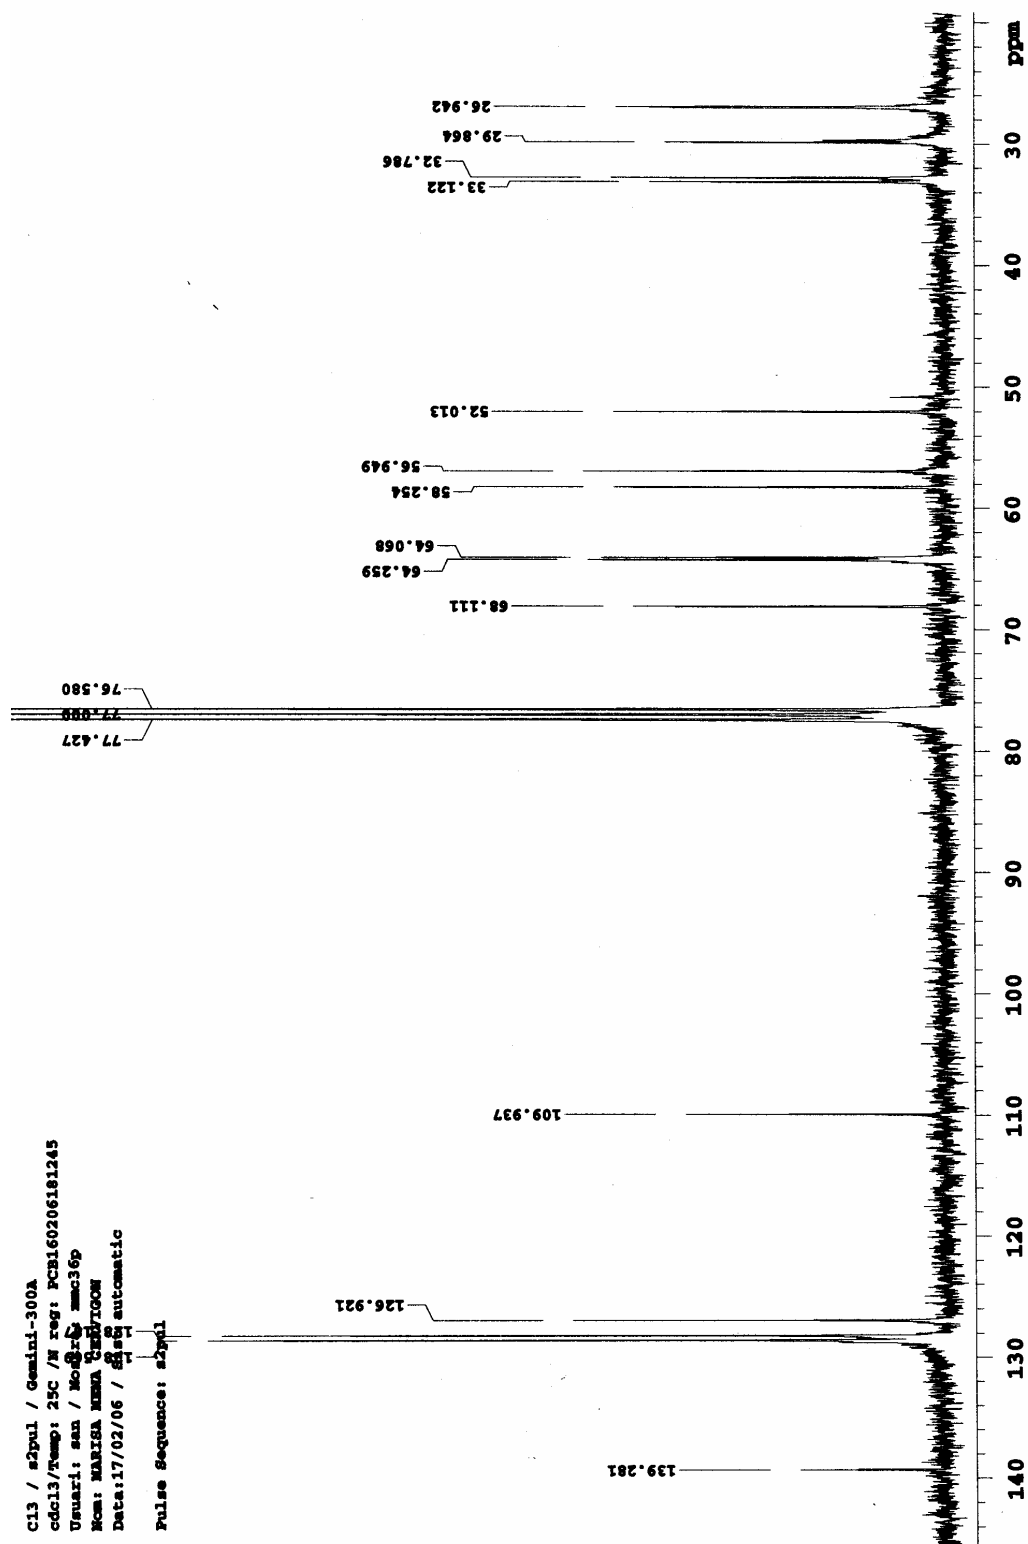

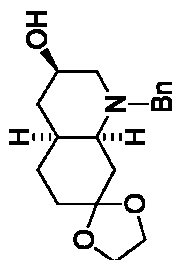

13

H1 / gcosy / Bruker DMX500  
cdcl3 / 25C / N Reg.: 00425  
exp1 / m005 / MWet.: 00425  
Data: 22/05/02 / Op.: MA Molins

los datos en formato original estan en:  
/data3/8500/san/May2002/san-00425

exp1 cosy9s

SAMPLE DEC. & VT  
date 05-22-02 dfrq 500.621  
solvent cdc13 dof 3257.4  
file 3.cv dhp 20  
ACQUISITION  
sfrq 500.620 temp 25.0  
at 0.469 sb 0.059  
np 2048 ss not used  
pw 4370.6 hzid 70  
ss 16 wtfille  
pw 3.8 proc  
rd 1.000 fn 2048  
tof 2069.7 math  
nt 4 2D PROCESSING  
ct 0 sb1 0.029  
dp 2D ACQUISITION y wtfille1  
sw1 4370.6 procl  
n1 256 f1  
2D DISPLAY  
sp 535.6  
sp1 420.3 wp 1529.5  
wp1 1632.0 vs 500  
sc2 0 sc 6  
wc2 153 wc 153  
rf11 4370.6 hzmm 10.00  
rfp1 4235.5 ls 500.00  
th 4235.5 rfp  
th 100.00  
ins  
nm cdc av

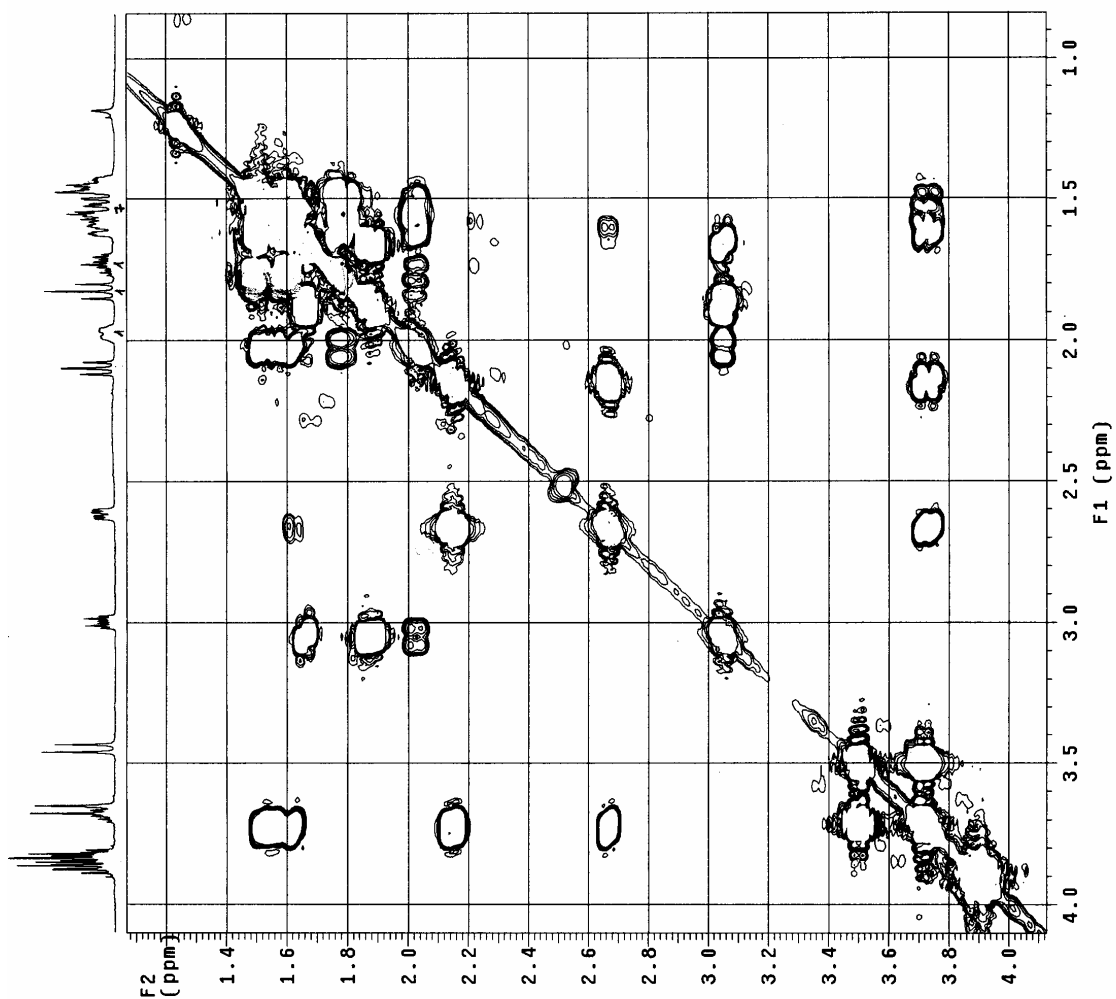

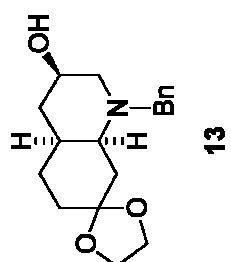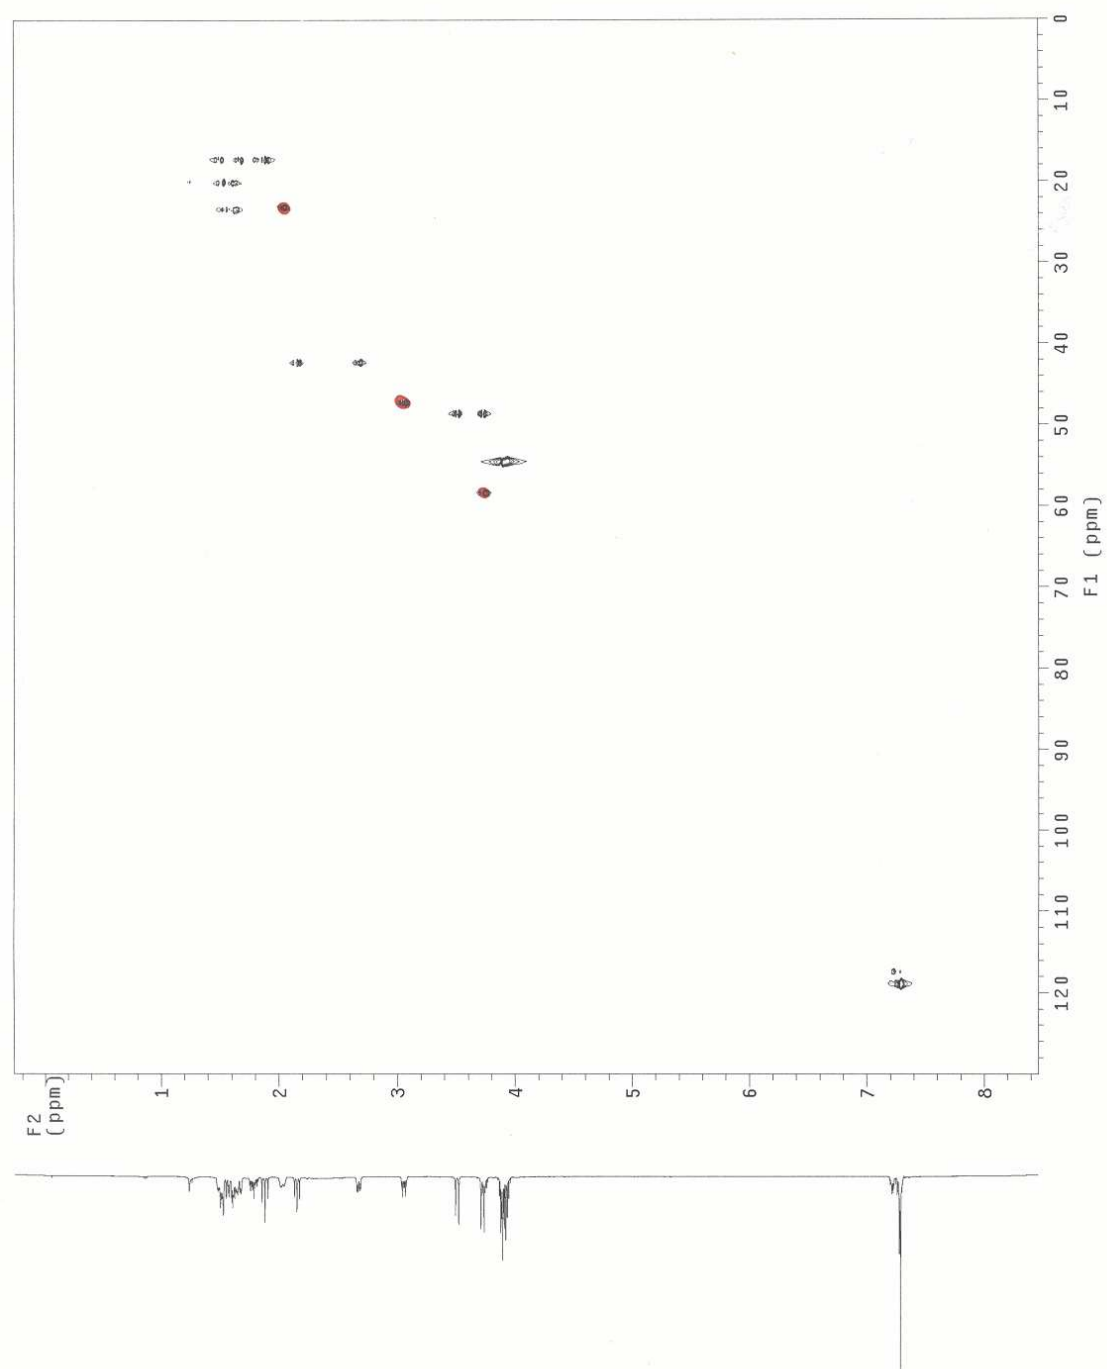

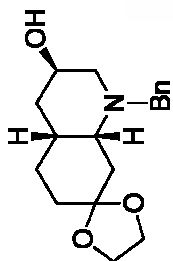

14

cdci3/Temp: 25C /N reg: 3702/2005  
 Usuari: jlab /Q: 2 /Mostra: mmc340  
 Nom: MARIA CRISTINA CERVIGON  
 Data: 14/10/05 / Sist automatic  
 Pulse Sequence: s2pul

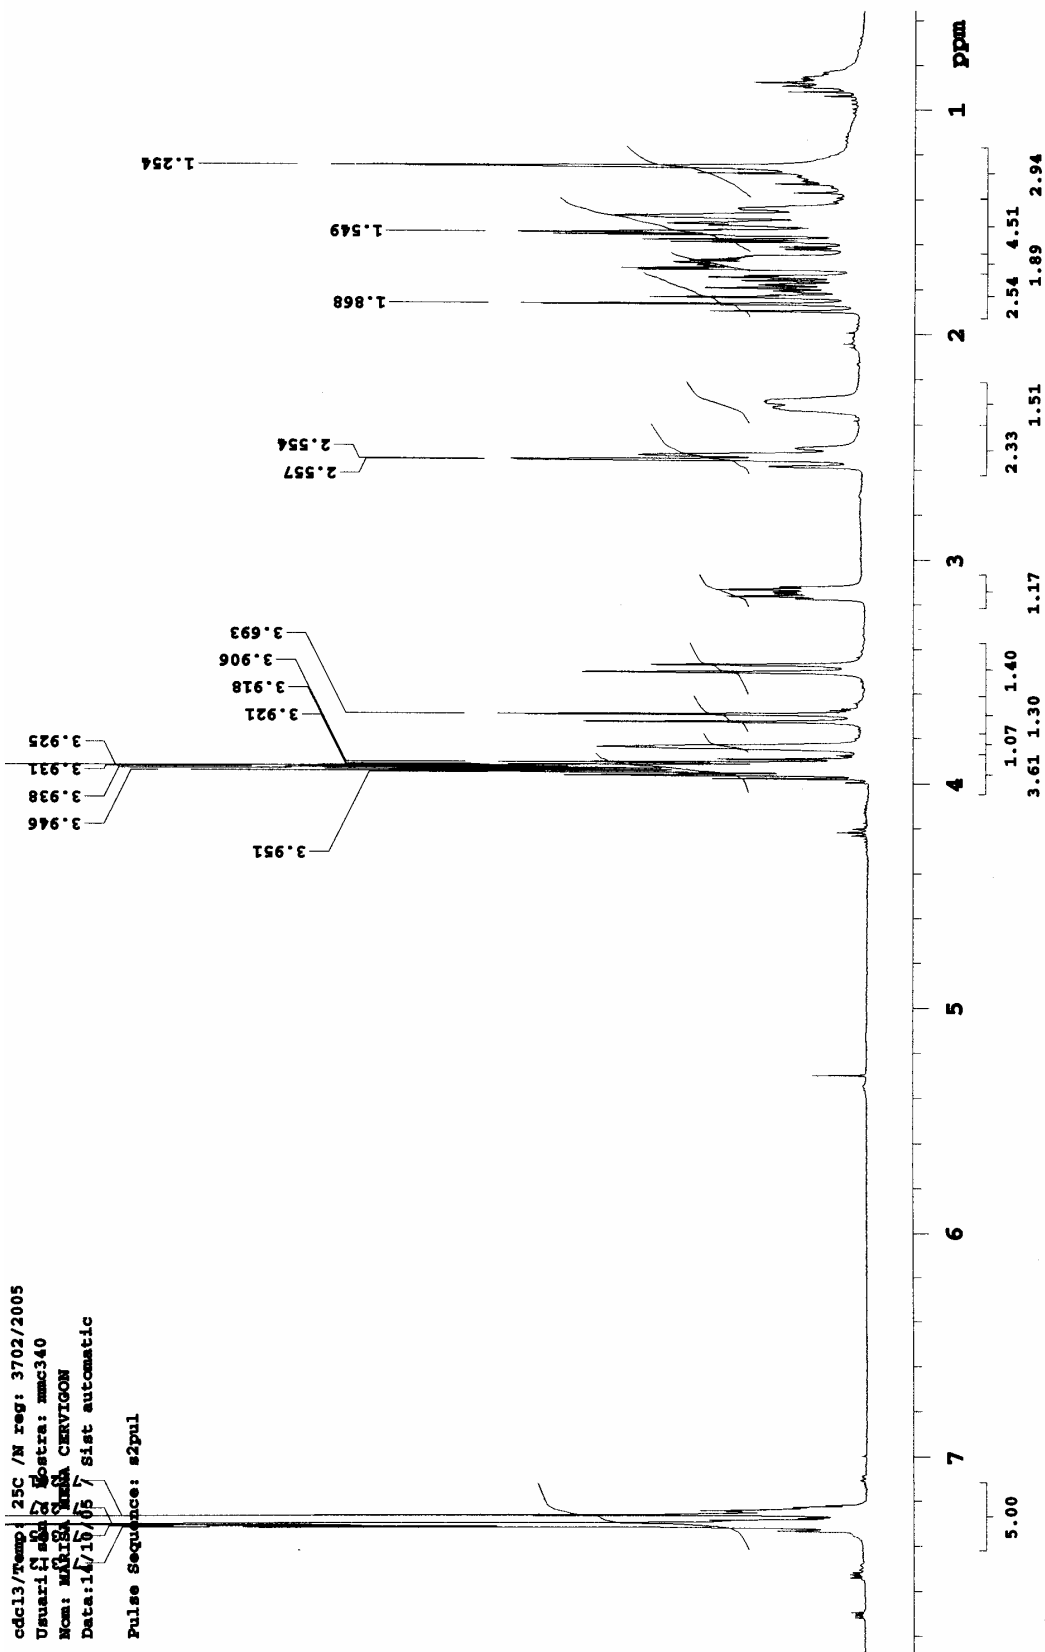

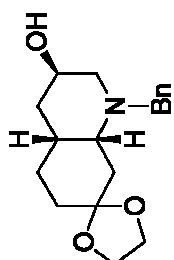

14

C13 / s2pul / Mercury-400\_qui  
 cdcl3/Temp: 25C / N reg: 3702/2005  
 Usuari: san / 40-33ra: mmc340  
 Nom: MARISA MORA / CERVIGON  
 Data:14/10/05 14:58  
 Pulse Sequence: s2pul

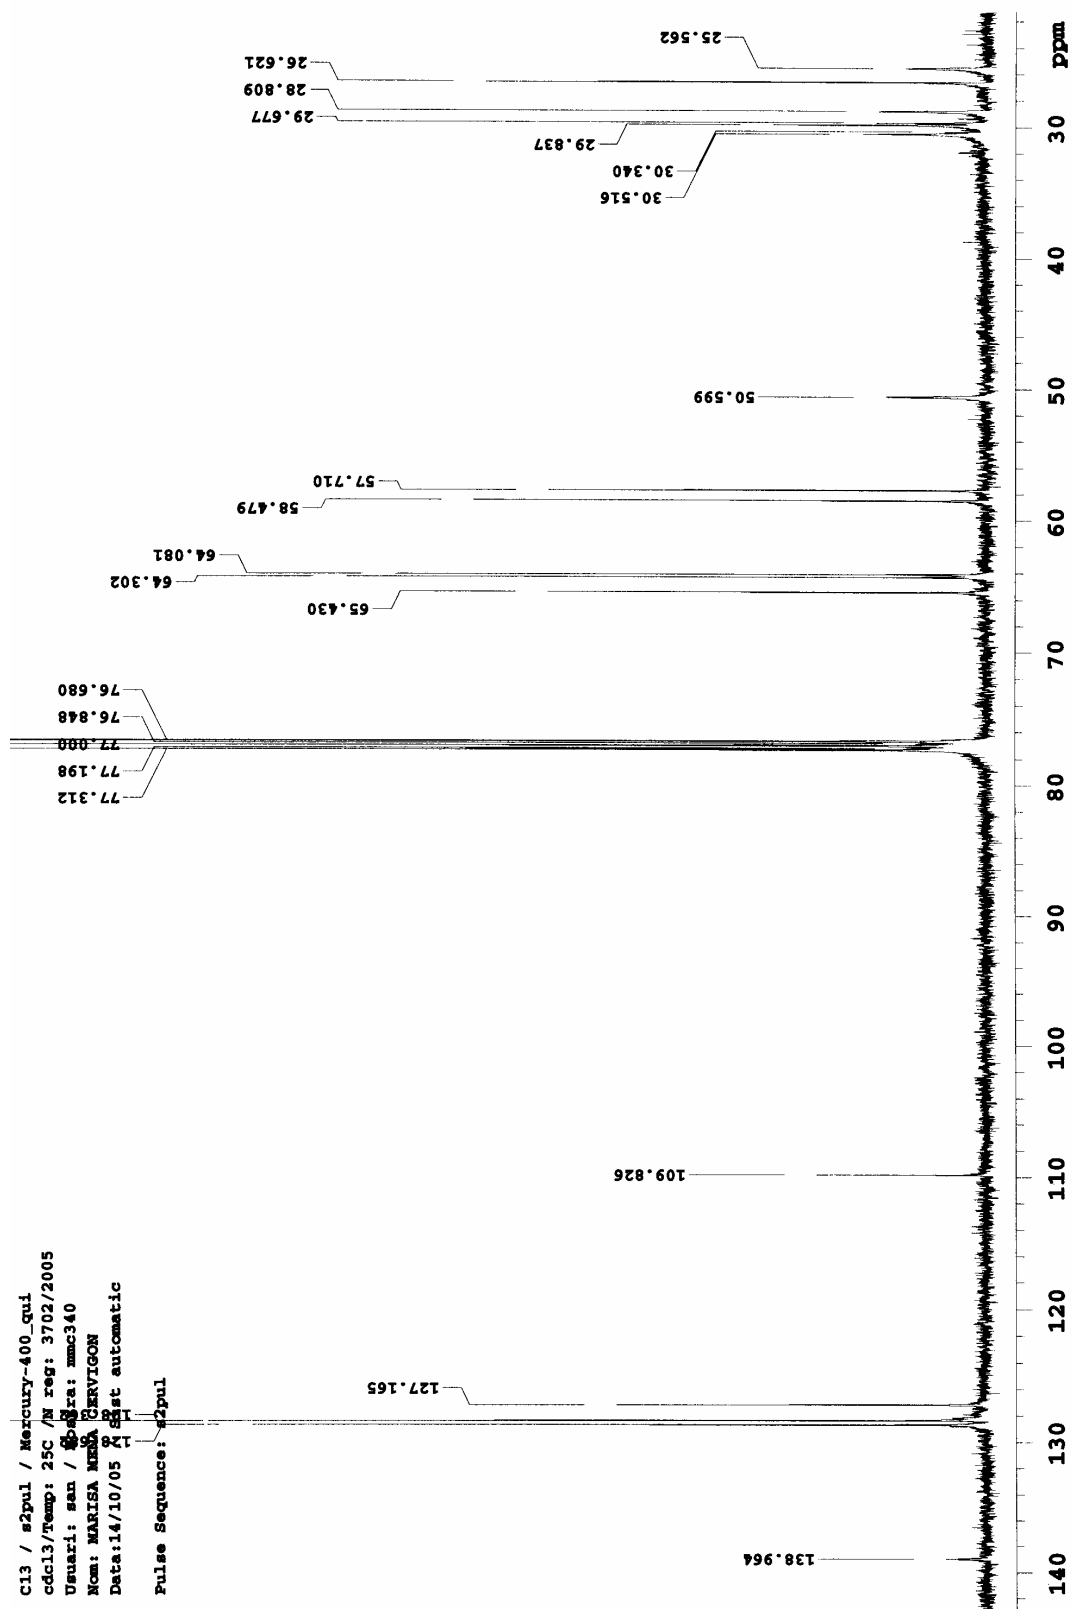



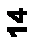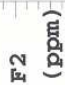



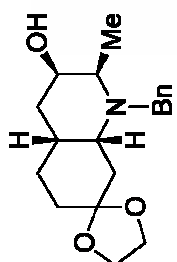

15

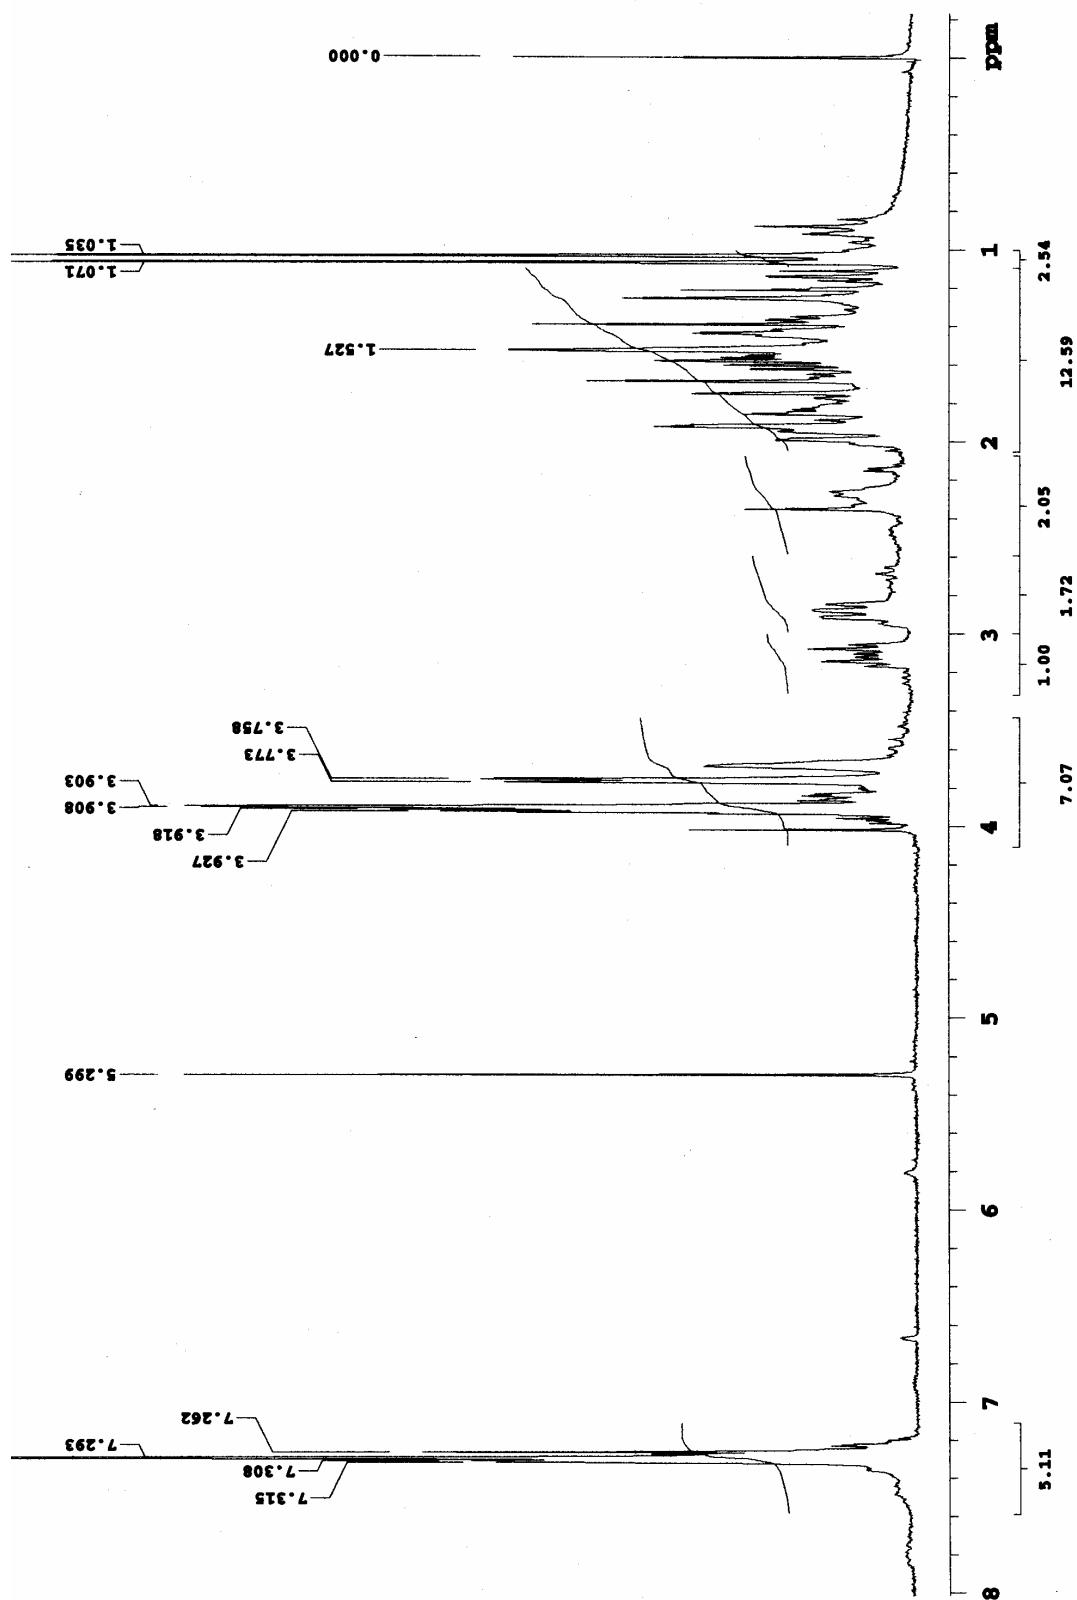

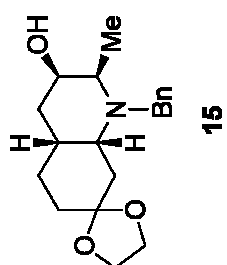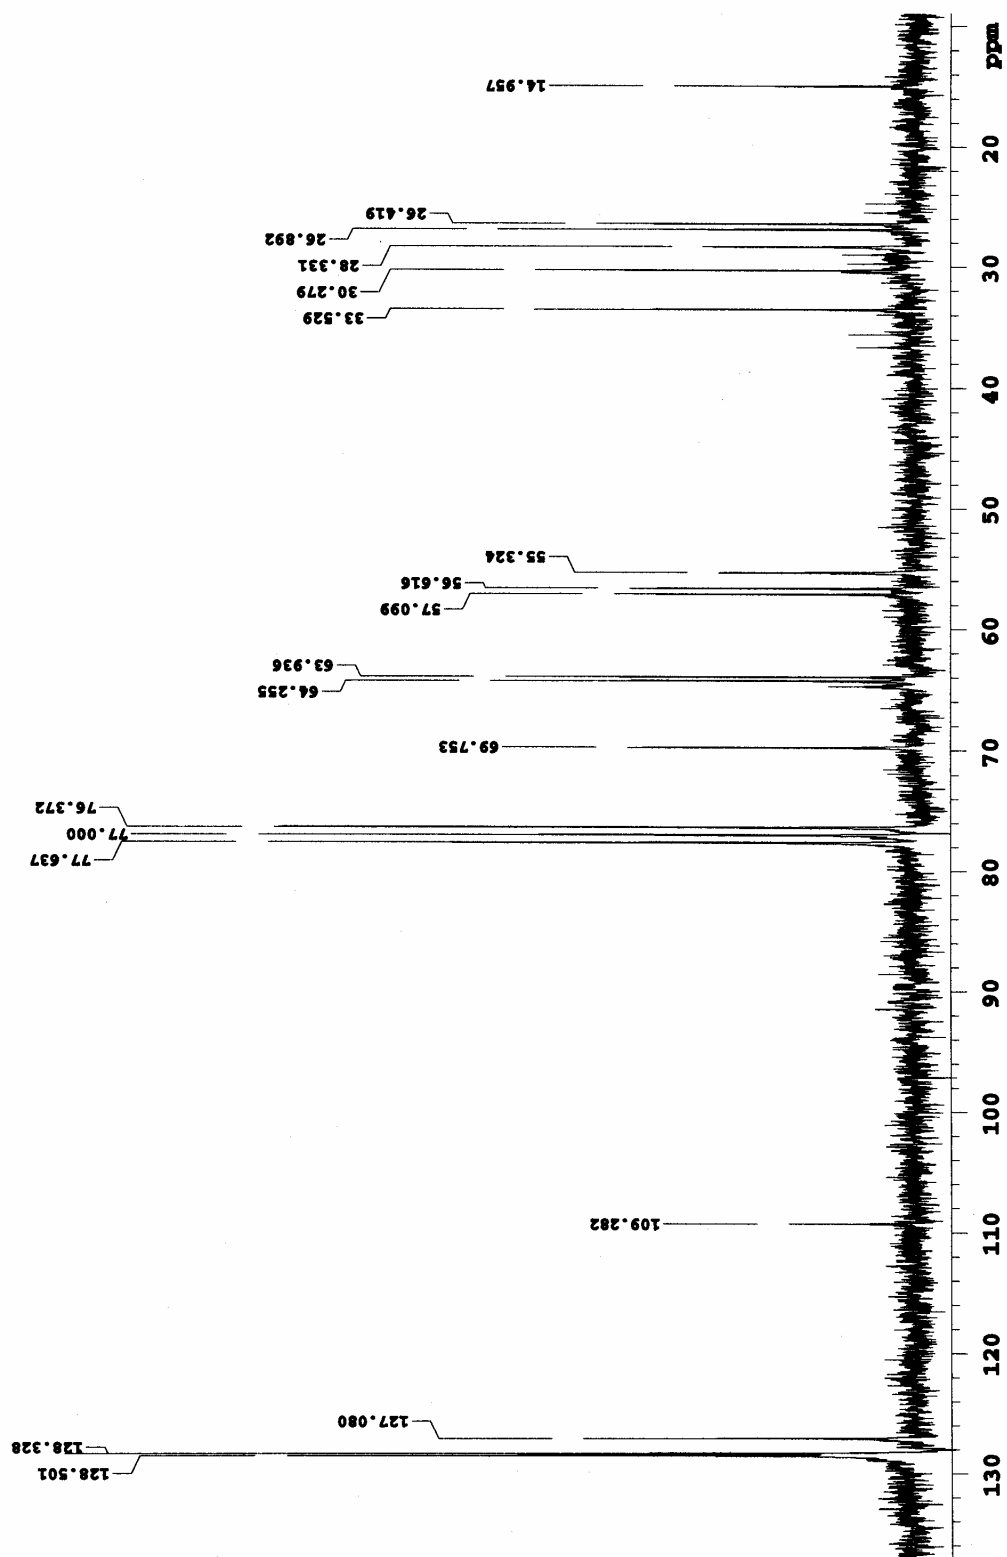

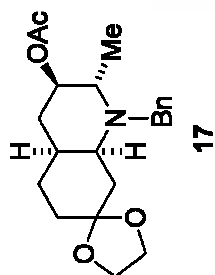

E1 / s2pul / Mercury-400\_qul  
 cdc13/Temp: 25C / N reg: M40005-3466  
 Usuari: sdn / Mostra: ammp42  
 Nom: MARIA NEMA CERVIGON  
 Data: 07/09/05 / Sist automatic  
 Pulse Sequence: s2pul

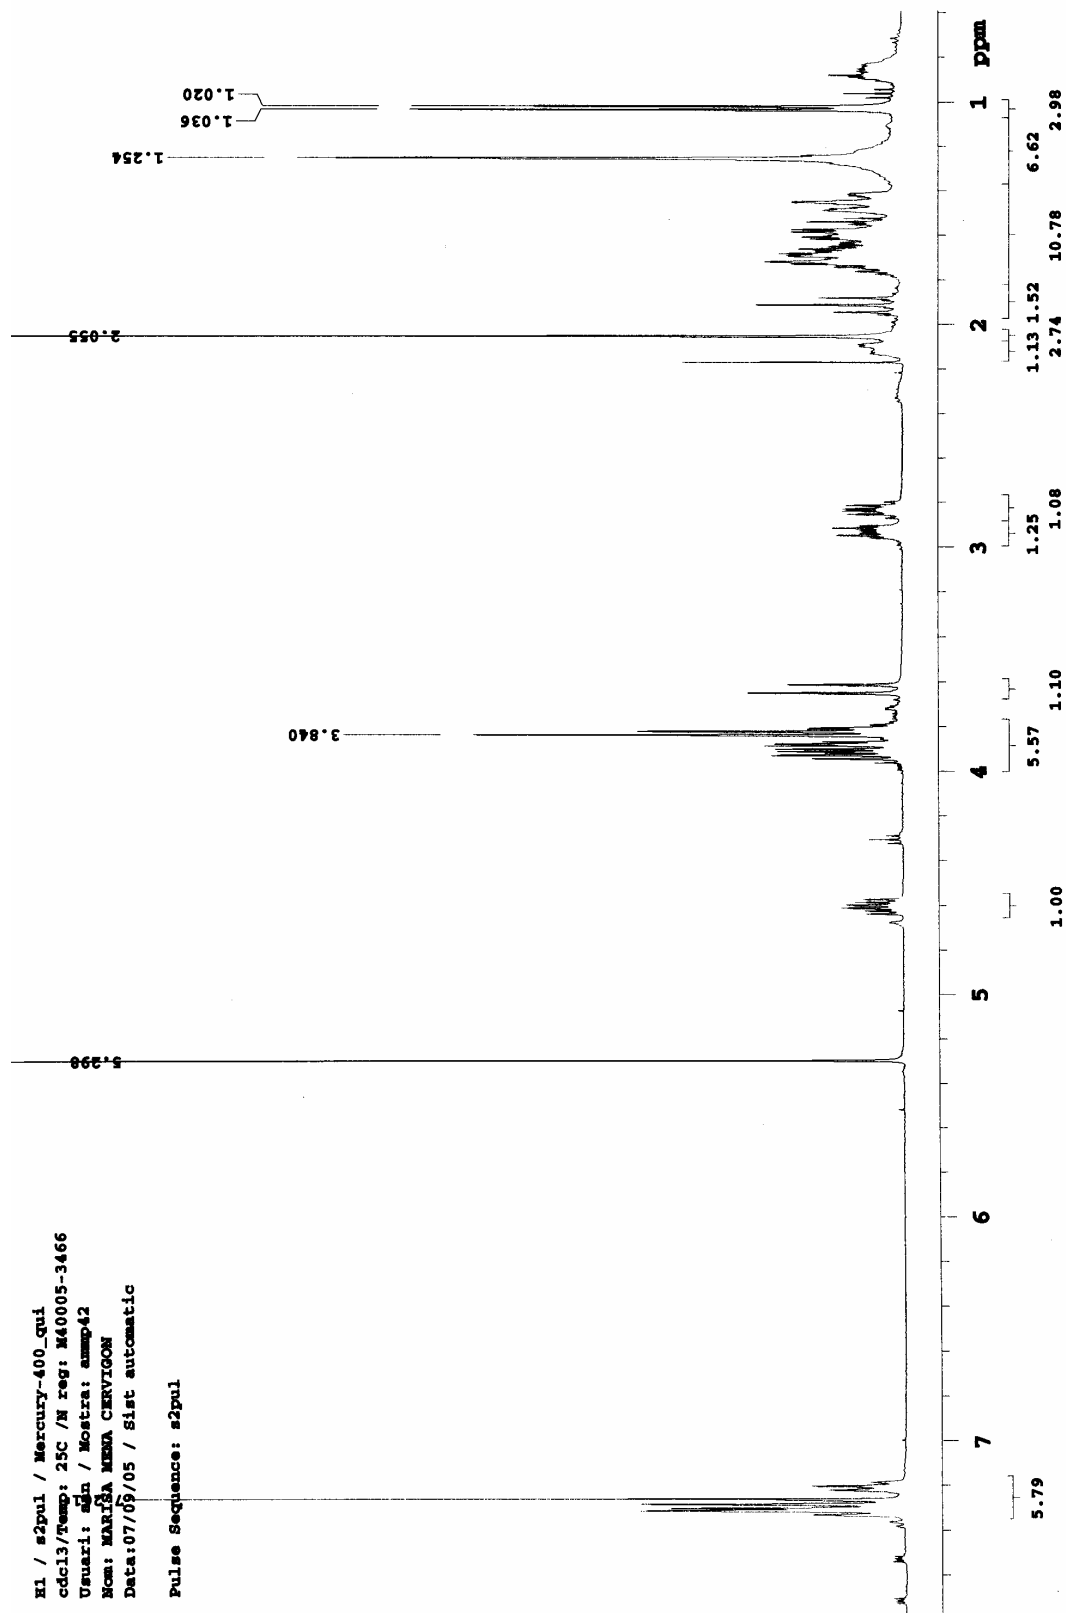

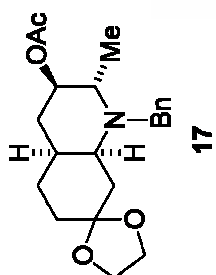

Cl3 / s2pul / Mercury-400\_qui  
 cdcl3/Temp: 25C / N reg: M40005-3466  
 Usuari: san / Mostra: ammp42  
 Nom: MARISA MENA CERVIGON  
 Data:07/09/05 / Sist automatic  
 Pulse Sequence: s2pul

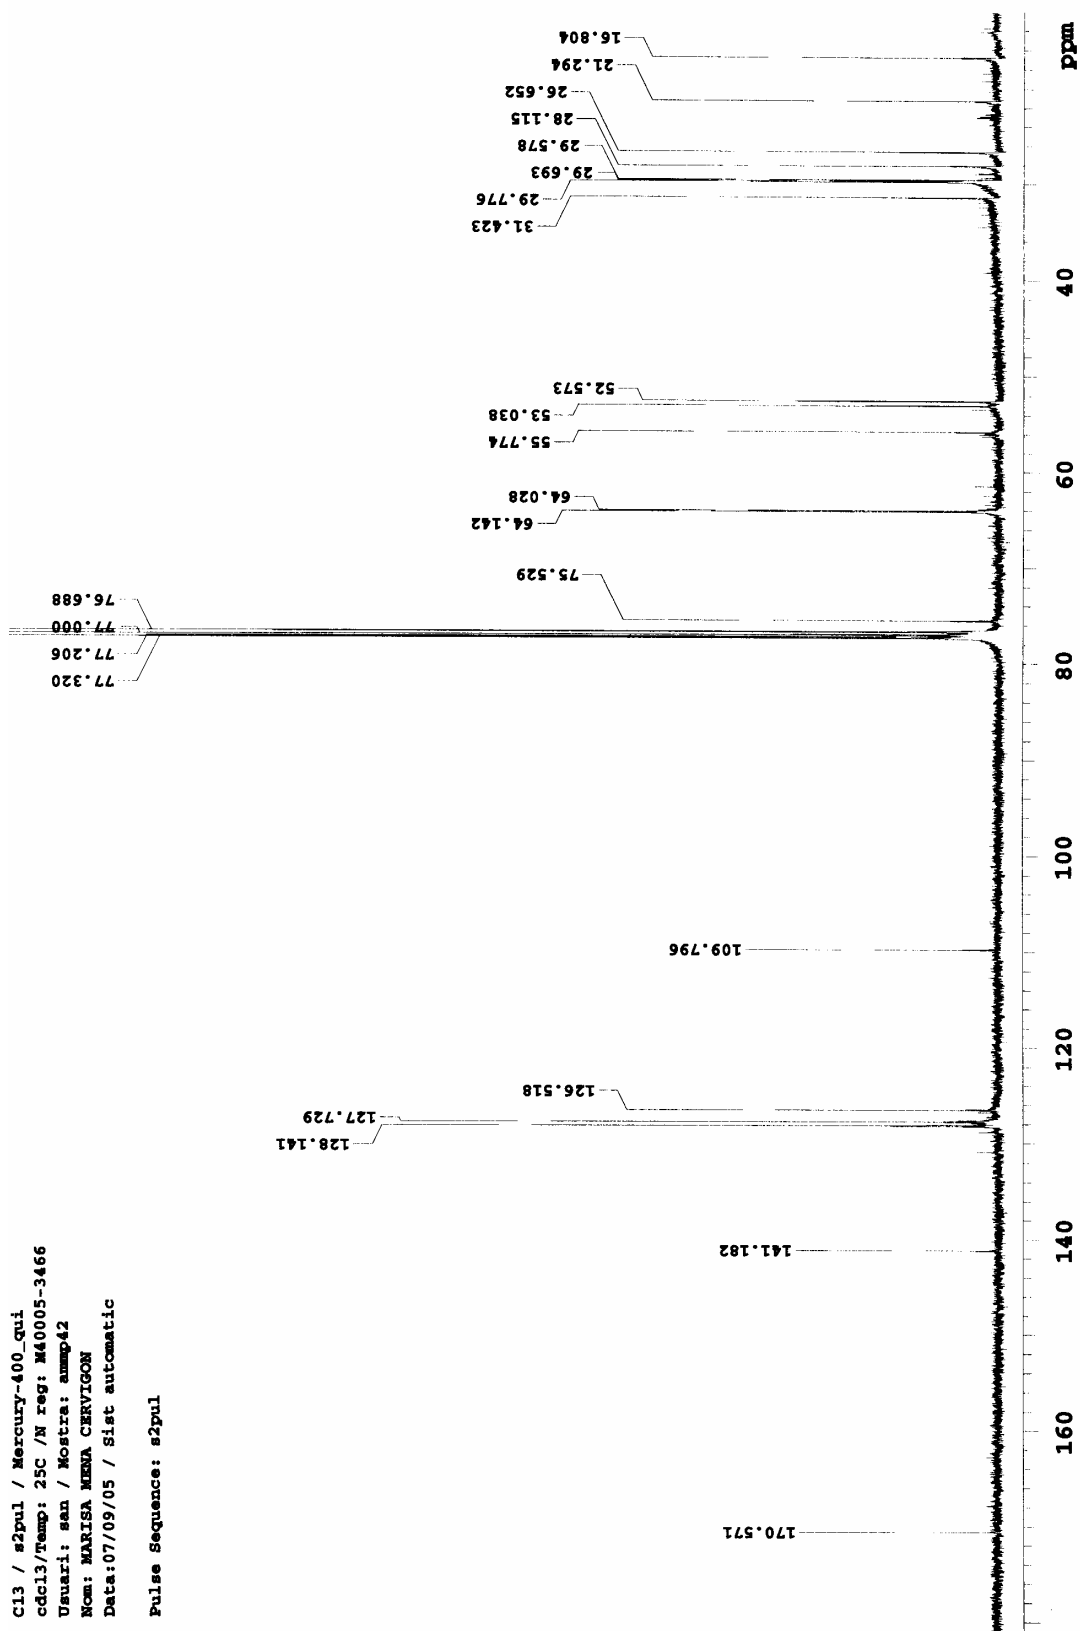

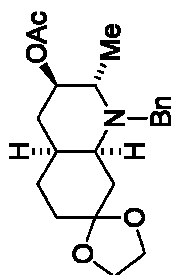

17

H1 / gCOSY / Mercury-400\_qui  
cdcl3/temp: 25C /M reg: M40005-3466  
Usuari: san / Mostra: ammp42  
Nom: MARISA MEMA CERVIGON  
Data: 07/09/05 / Sist automatic

exp3 gCOSY

| SAMPLE         | date              | hs            | flags    |
|----------------|-------------------|---------------|----------|
| Sep 7 2005     | hs                | mn            |          |
| solvent        | cdcl3             | sepu          | n        |
| sample         | auto_Custom-hs1v1 | 1002          |          |
| Q_07Sep2005    | SPECIAL           |               |          |
| ACQUISITION    | temp              | 25.0          |          |
| sw             | 4310.3            | gain          | 28       |
| at             | 0.150             | spin          | 0        |
| np             | 1294              | F2 PROCESSING |          |
| fb             | not used          | sb            | -0.075   |
| ss             | 16                | abs           | not used |
| d1             | 1.000             | fn            | 2048     |
| nt             | 4                 | F1 PROCESSING |          |
| 2D ACQUISITION | abi               | -0.059        |          |
| sv1            | 4310.3            | sbs1          | not used |
| ni             | 256               | procl         | lp       |
| PRESATURATION  | fn1               | 2048          |          |
| satmode        | n                 | DISPLAY       |          |
| satfrq         | 0                 | sp            | 54.4     |
| satdly         | 0                 | wp            | 2068.8   |
| satpwr         | 0                 | sp1           | 197.7    |
| TRANSMITTER    | wp1               | 1752.8        |          |
| tn             | H1                | xf1           | 573.4    |
| sfrq           | 400.113           | rfp           | 0        |
| tof            | -430.2            | rf11          | 573.4    |
| tpwr           | 58                | xfp1          | 0        |
| PW             | 12.200            | PLOT          |          |
| GRADIENTS      | wc                | 131.8         |          |
| gvlv11         | 1002              | sc            | 6.2      |
| gt1            | 0.001000          | wc2           | 131.8    |
| gstab          | 0.000500          | sc2           | 0        |
| DECOUPLER      | vs                | 171           |          |
| dn             | Cl3               | th            | 7        |
| dm             | nm                | ai            | cdc      |
|                |                   | av            |          |

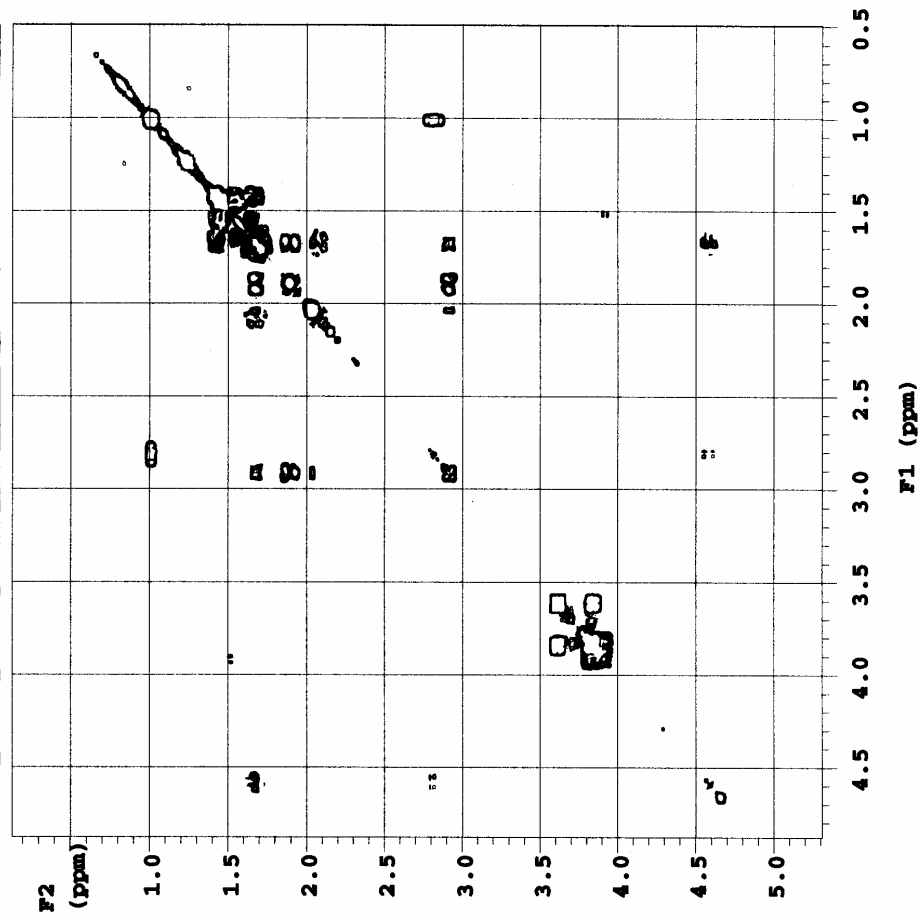

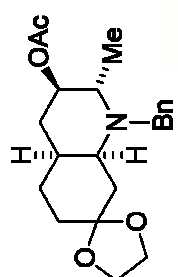

17

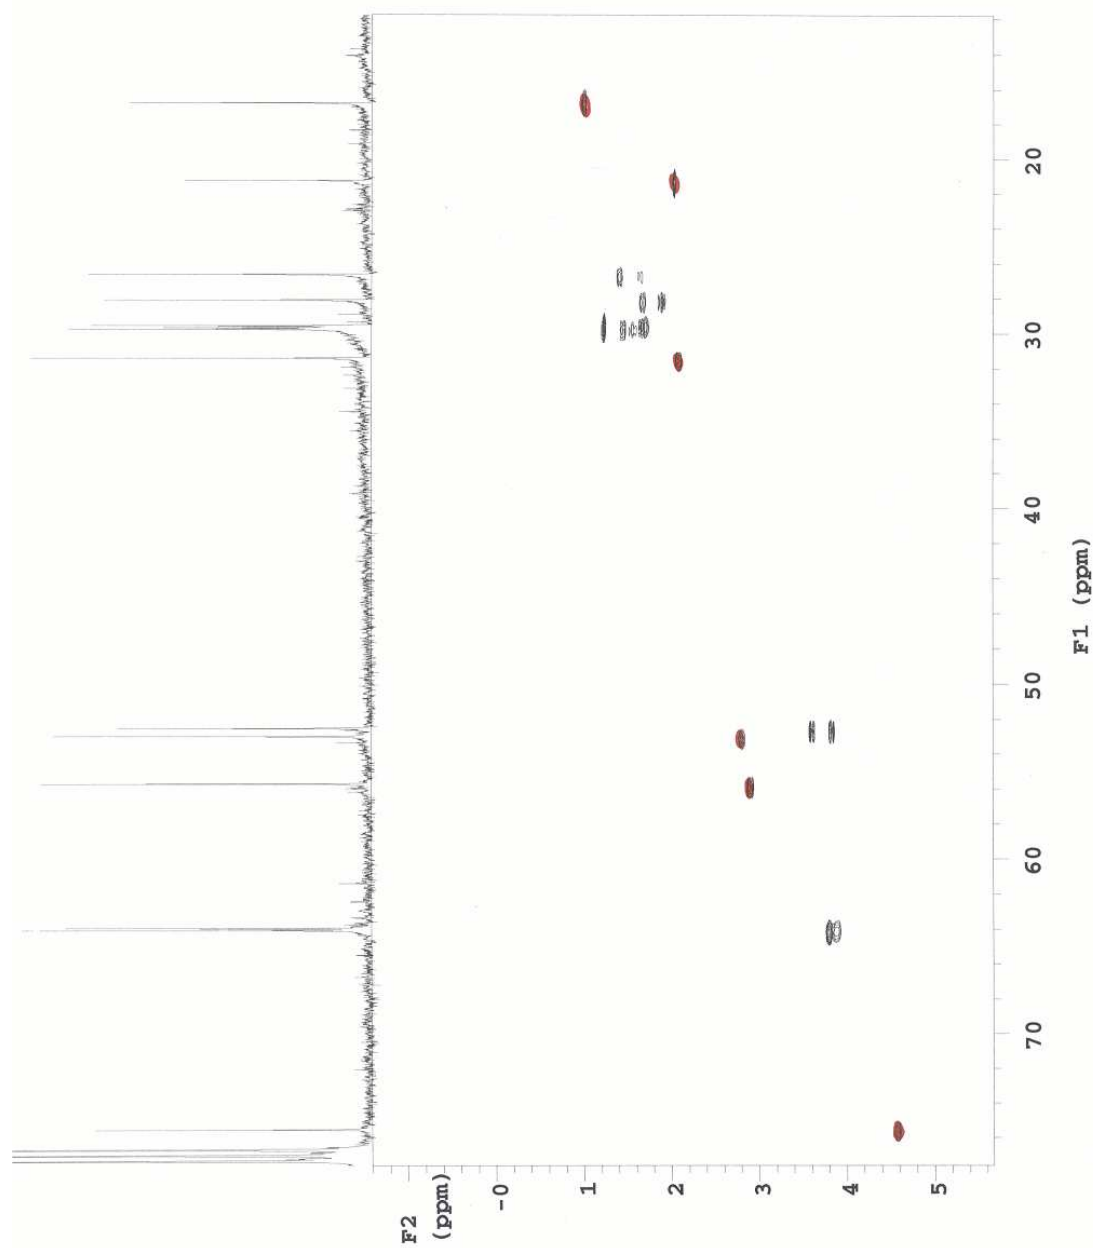

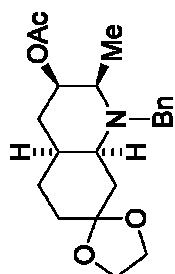

18

H1 / s2pul / Mercury-400\_qui  
 cdcl3/Temp: 25C /N reg: M40005-051005173853  
 Usuari:Cs33 / 2 12estra: mmp15  
 Nom: MARI6 / 2001 CERVIGON  
 Data:06/16/05 / sist automatic  
 Pulse Sequence: s2pul

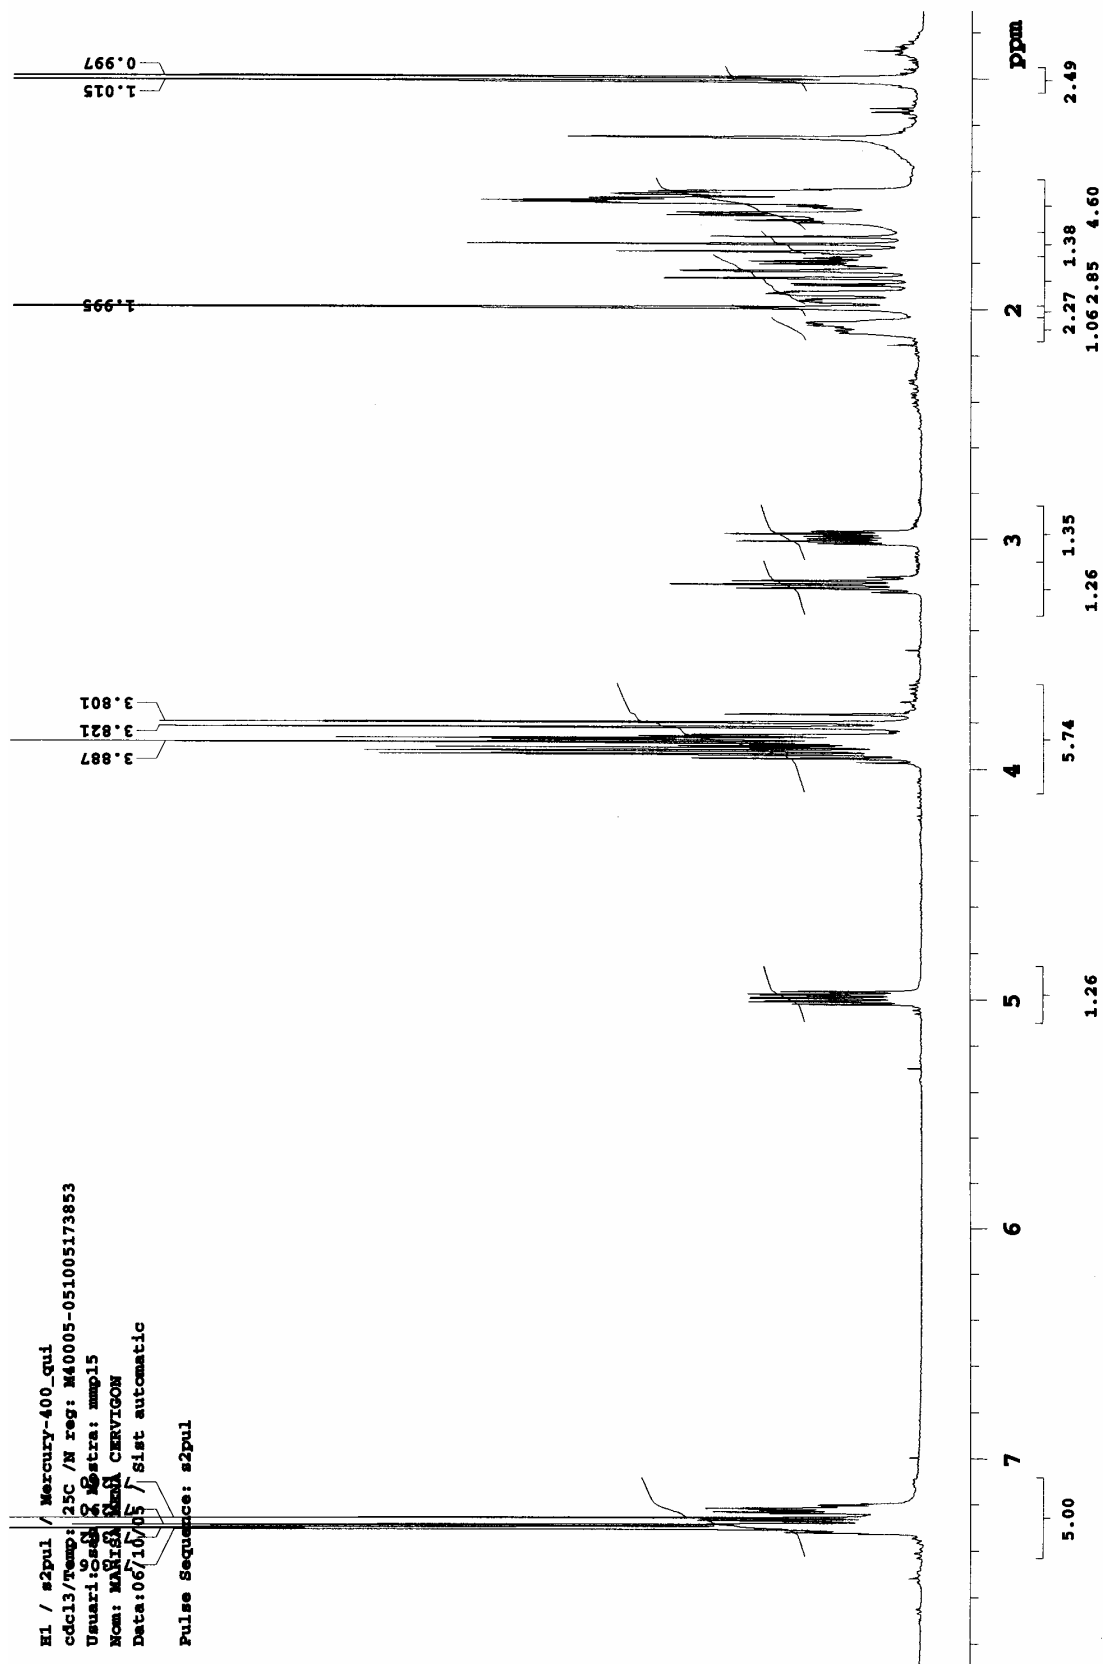

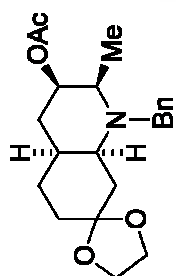

18

C13 / s2pul / Mercury-400.qui  
 cdc13/Temp: 25C / N reg: M40005-051005173853  
 Usuari: san / Mostra: mmp15  
 Nom: MAPISA MEMA CERVIGON  
 Data:06/10/05 / Sist automatic  
 Pulse Sequence: s2pul

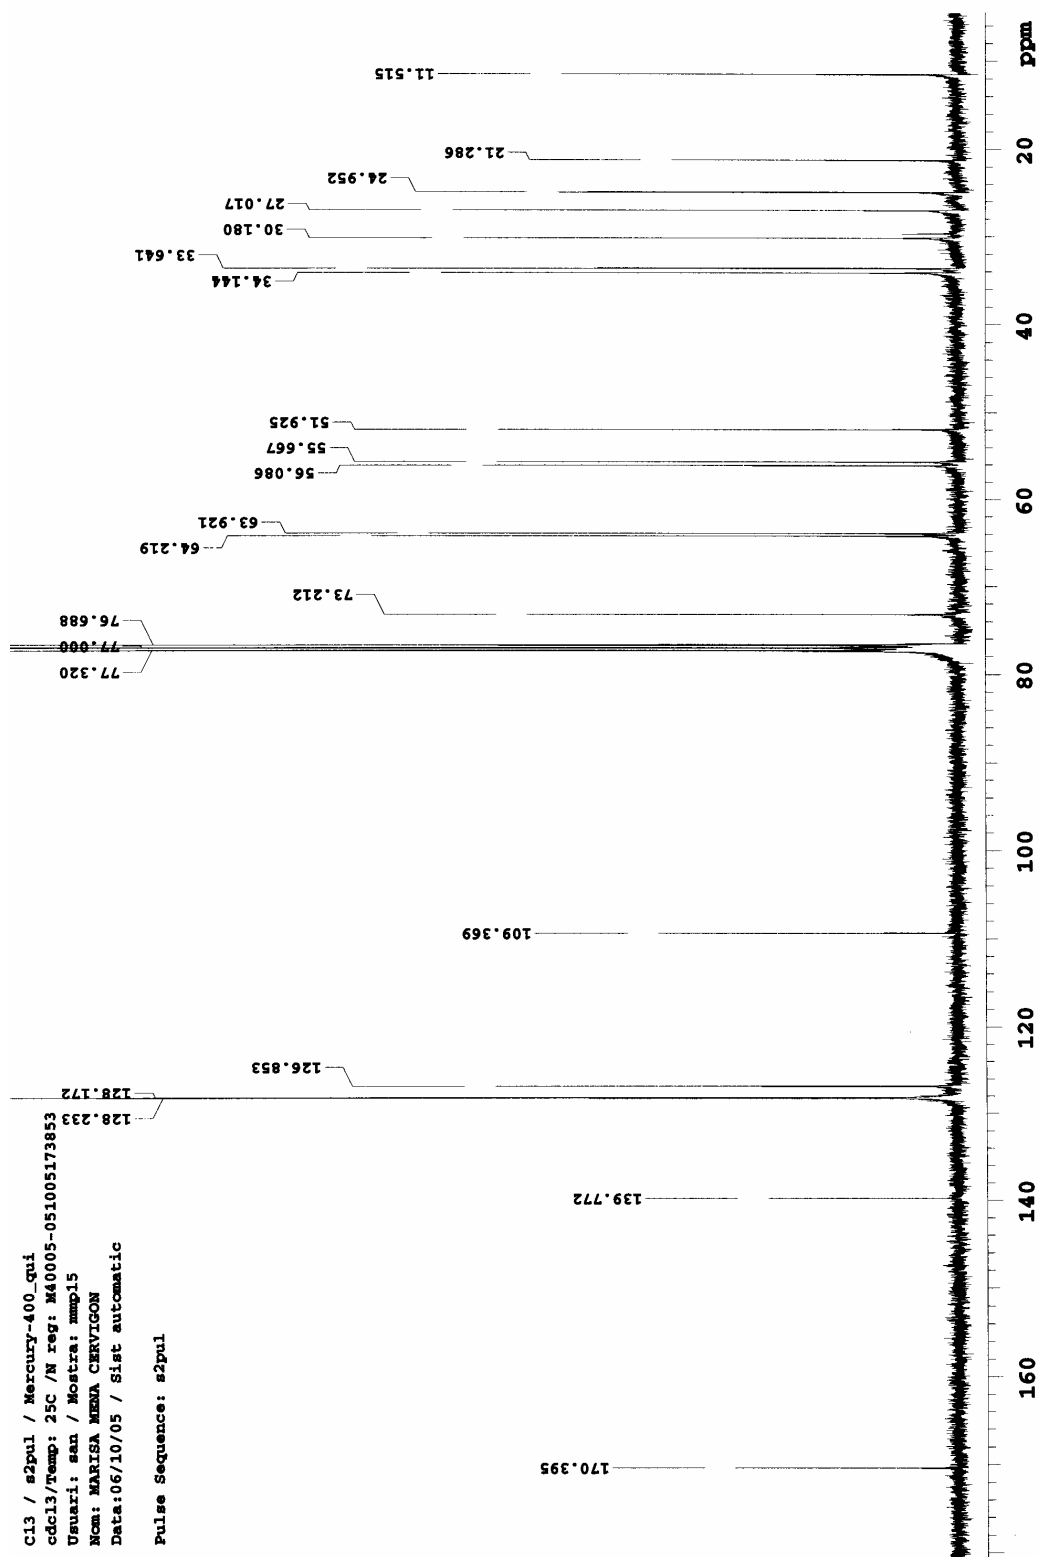



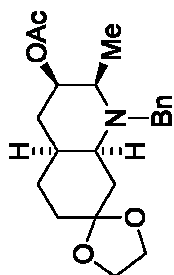

18

H1 / gCOSY / Mercury-400\_qui  
cdcl3/Temp: 25C / N reg: M40005-051005173  
853  
Usuari: san / Mostra: mmp15  
Nom: MARISA NEMA CERVIGNON  
Data:06/10/05 / Sist automatic

exp22 gCOSY

| SAMPLE         |                    | FLAGS         |          |
|----------------|--------------------|---------------|----------|
| date           | Oct 6 2005         | hs            | mn       |
| solvent        | cdcl3              | sspul         | n        |
| sample         | auto_Custom-hsglv1 |               | 1002     |
| Q_06Oct2005    | SPECIAL            |               |          |
| ACQUISITION    |                    |               |          |
| sw             | 3937.0             | gain          | 25.0     |
| at             | 0.150              | spin          | 0        |
| np             | 1182               | F2 PROCESSING |          |
| fb             | not used           | sb            | -0.075   |
| ss             | 16                 | abs           | not used |
| d1             | 1.000              | fn            | 2048     |
| nt             | 4                  | F1 PROCESSING |          |
| 2D ACQUISITION |                    |               |          |
| sw1            | 3937.0             | sb1           | -0.065   |
| nd             | 256                | proc1         | lp       |
| PRESATURATION  |                    |               |          |
| satmode        | n                  | DISPLAY       |          |
| satfrq         | 0                  | sp            | -31.7    |
| satdly         | 0                  | wp            | 2389.9   |
| satpwr         | 0                  | sp1           | 210.7    |
| TRANSMITTER    |                    |               |          |
| tn             | H1                 | rf1           | 1955.0   |
| sfrq           | 400.113            | rfp           | 485.8    |
| tof            | -540.4             | xf11          | 485.8    |
| tpwr           | 58                 | rfp1          | 0        |
| PLOT           |                    |               |          |
| pw             | 12.200             | wc            | 131.8    |
| GRADIENTS      |                    |               |          |
| gslv11         | 1002               | sc            | 6.2      |
| gt1            | 0.001000           | vc2           | 131.8    |
| gstab          | 0.000500           | sc2           | 0        |
| DECOUPLER      |                    |               |          |
| dn             | C13                | th            | 139      |
| dm             | nmn                | ai            | cdc      |
|                |                    | av            | 6        |

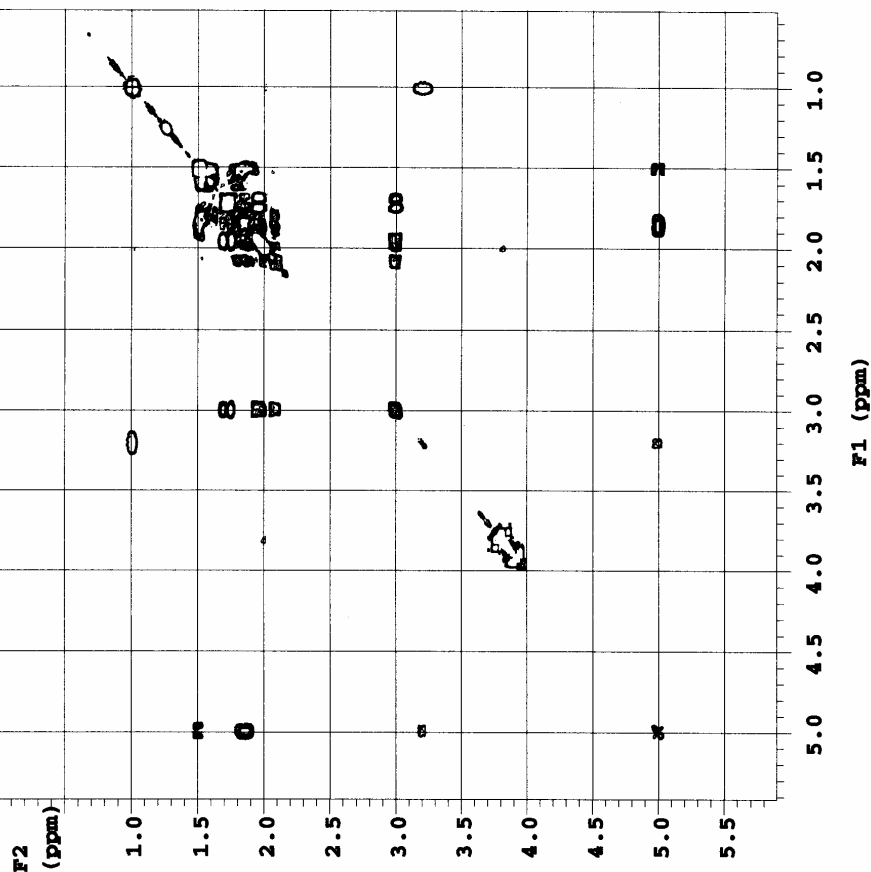

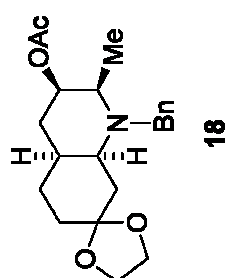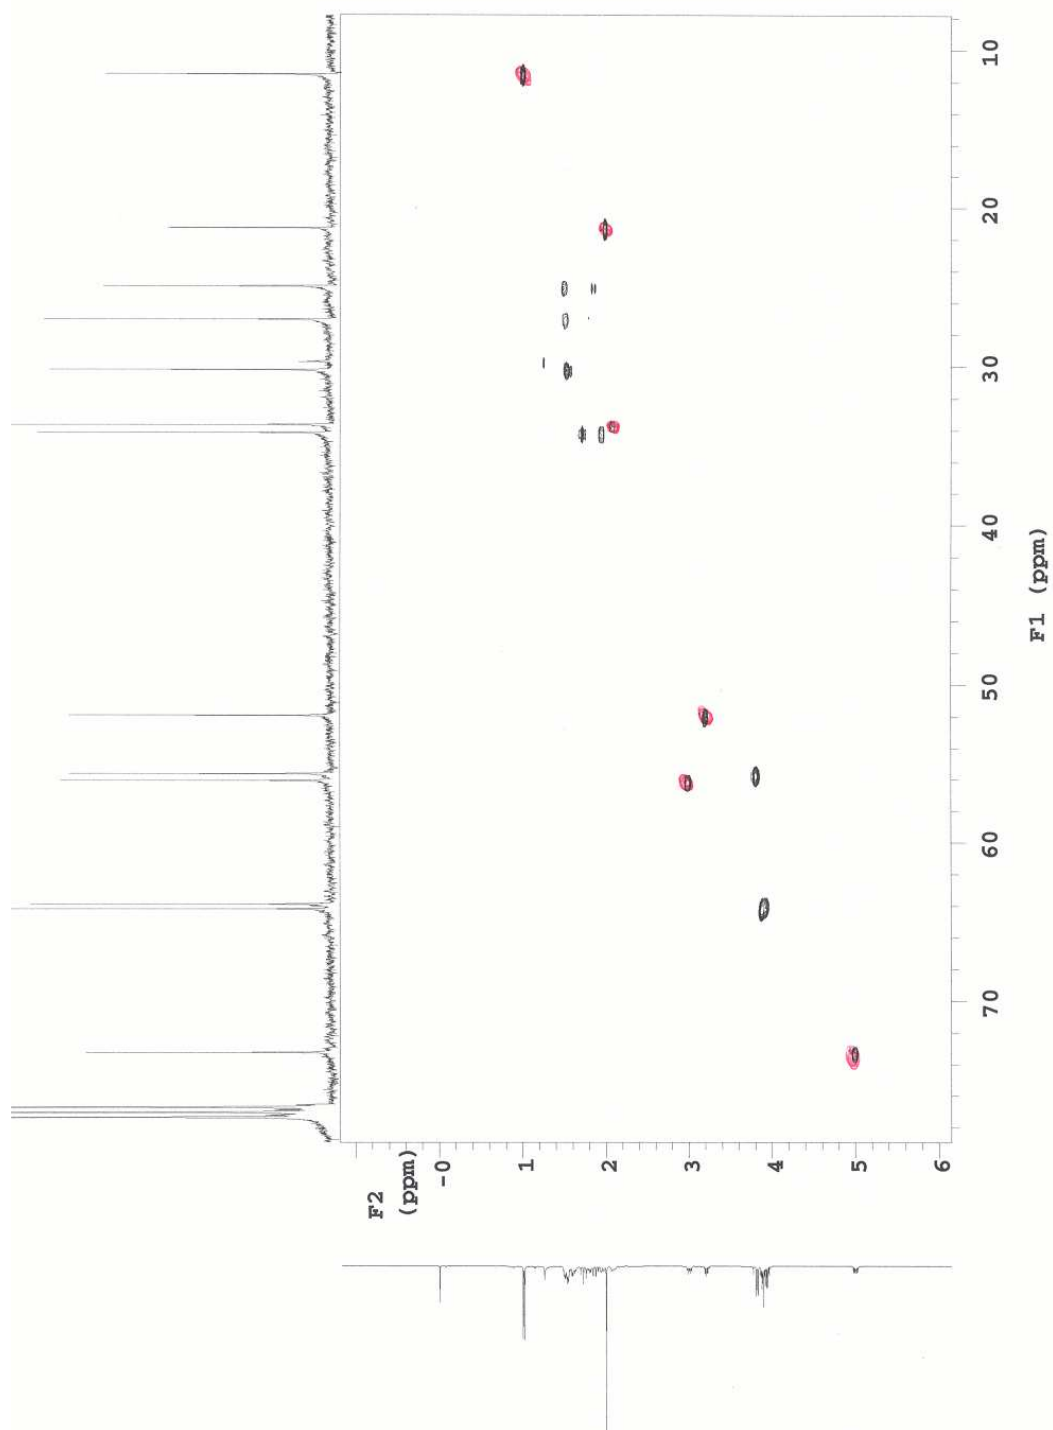

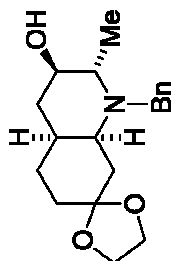

21

H1 / s2pul / Gemini-300A  
 cdcl3/Temp: Ambient /N reg: G30005-260905145523  
 Usuari: sas / Mostra: msc472final  
 Nom: MARIS MESA CERVIGON  
 Data:26/09/05 / Sist automatic  
 Pulse Sequence: s2pul

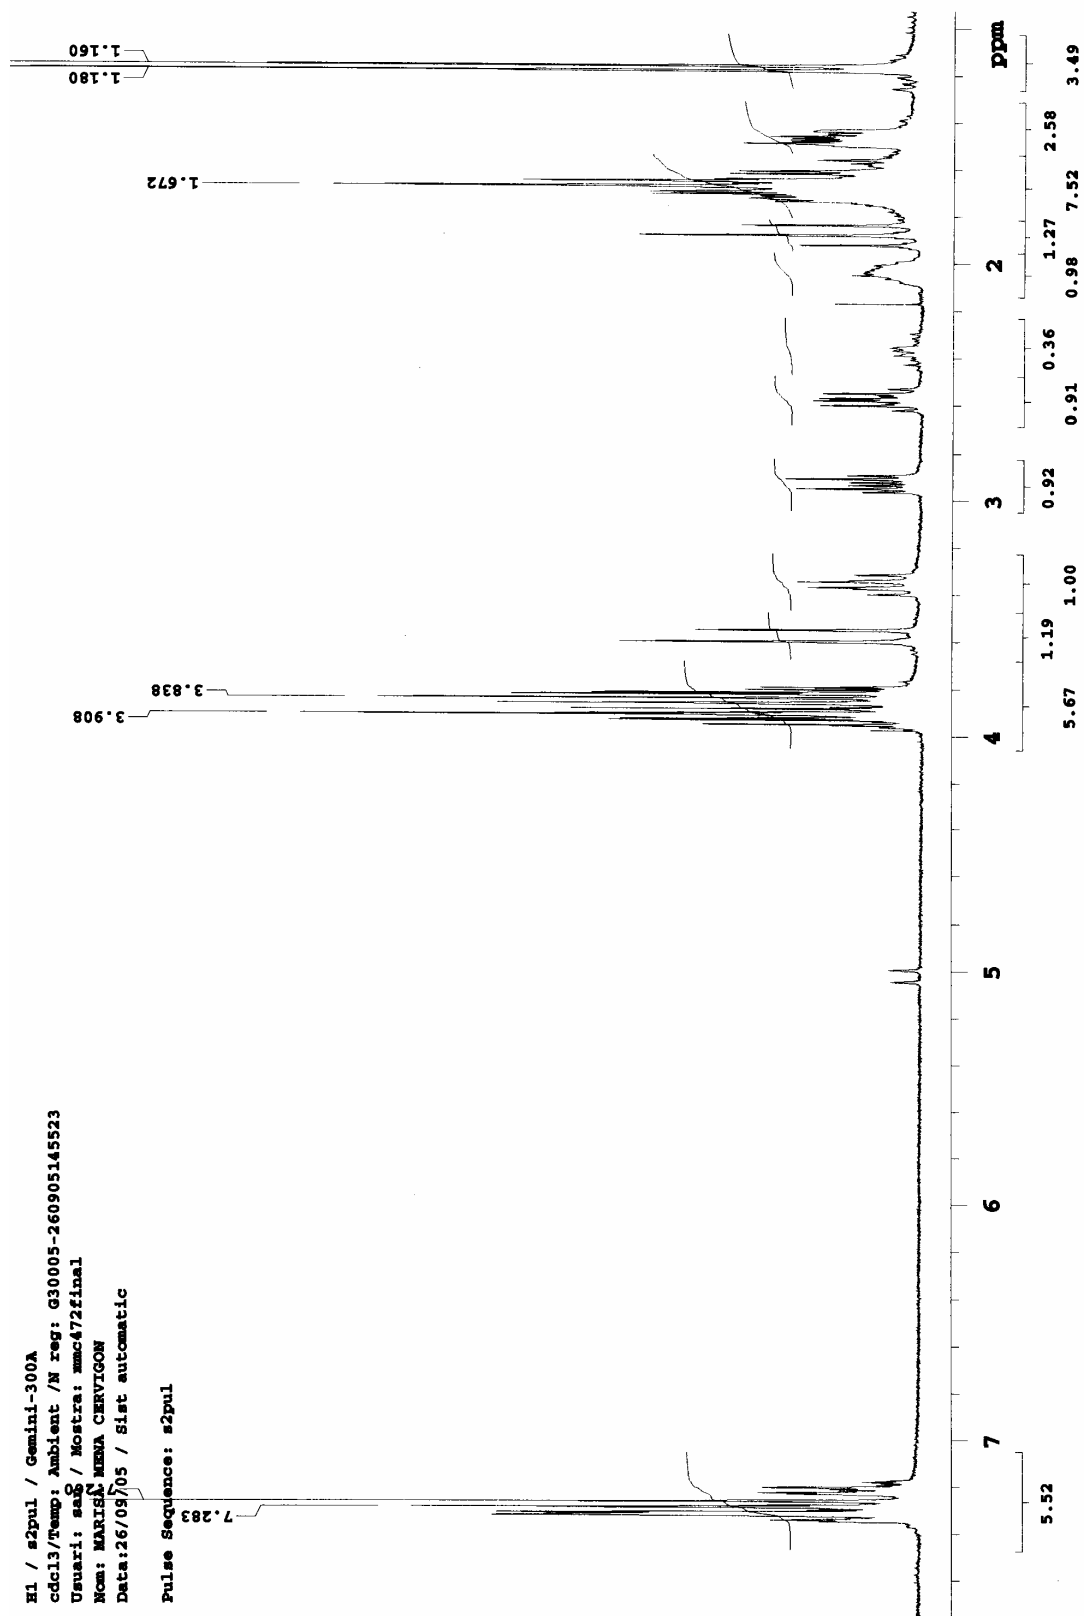

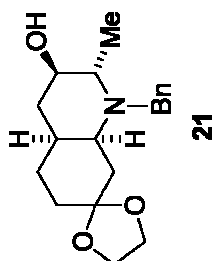

C13 / s2pul / Gemini-300A  
 cdcl3/Temp: Ambient / N reg: PCB260905173502  
 Usuari: san / Mostre: 5 mmc472final  
 Nom: WARISA MENA CAYUON  
 Data: 26/09/05 / Shift automatic  
 Pulse Sequence: s2pul

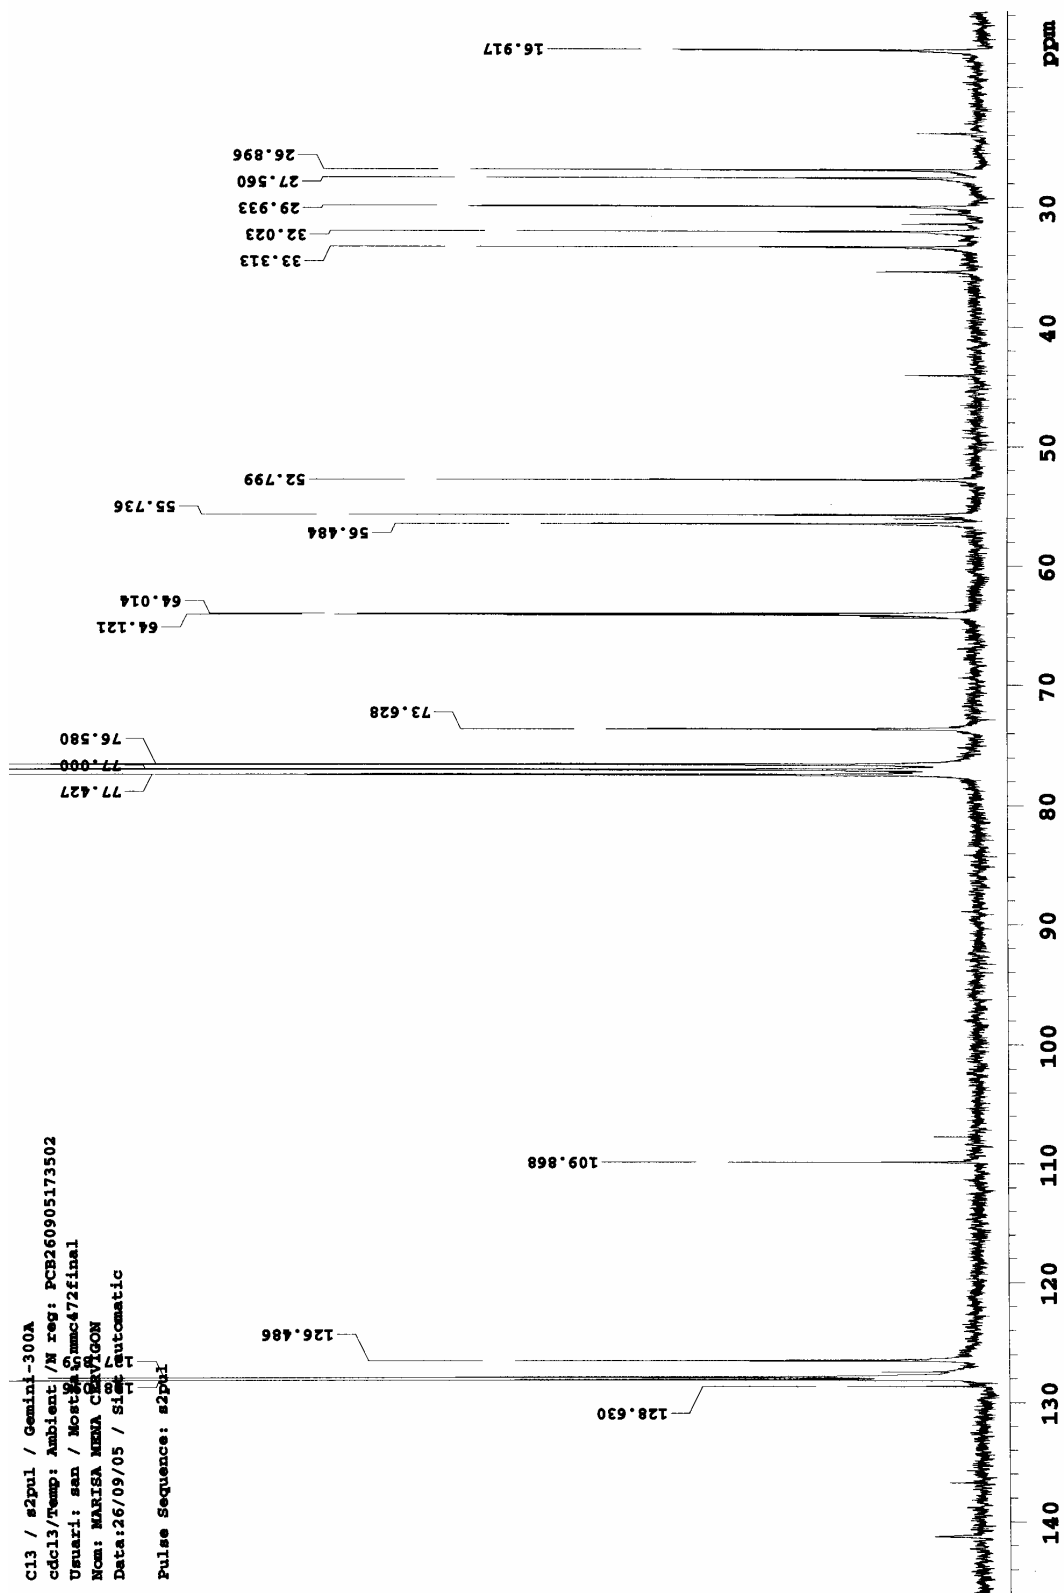

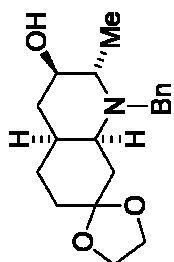

21

h1 / COSY / uemini-juva  
cdcl3/Temp: Ambient /N reg: 030005-26090

5145523

Usuari: san / Mostra: mmc472final

Nom: MARISA MENA CERVIGON

Data:26/09/05 / Sist automatic

exp7 COSY

| SAMPLE         |                   | SPECIAL       |          |
|----------------|-------------------|---------------|----------|
| date           | Sep 26 2005       | temp          | not used |
| solvent        | cdcl3             | gain          | 22       |
| sample         | auto_26Sep2- spin | 0             |          |
| 005 GRADIENTS  |                   |               |          |
| ACQUISITION    |                   |               |          |
| sv             | 2837.4            | hsgl1         | 2000     |
| at             | 0.180             | hsgt          | 0.005000 |
| np             | 1024              | F2 PROCESSING |          |
| fb             | 2250              | ab            | -0.090   |
| ss             | 2                 | abs           | not used |
| dl             | 1.000             | fn            | 2048     |
| nt             | 4                 | F1 PROCESSING |          |
| 2D ACQUISITION | abl               | -0.090        |          |
| sw1            | 2837.4            | abs1          | not used |
| nl             | 256               | procl         | lp       |
| TRANSMITTER    | fn1               | 2048          |          |
| tn             | h1                | DISPLAY       |          |
| sfrq           | 300.046           | sp            | -299.4   |
| tof            | -397.5            | wp            | 2066.3   |
| tpwr           | not used          | sp1           | 191.5    |
| pw             | 14.800            | wp1           | 1506.0   |
| PRESATURATION  | rf1               | 316.1         |          |
| satmode        | n                 | rfp           | 0        |
| satpwr         | 0                 | xf11          | 316.1    |
| satdly         | 0                 | rfp1          | 0        |
| satfrq         | 0                 | PLOT          |          |
| DECOUPLER      | wc                | 131.8         |          |
| dn             | h1                | sc            | 6.2      |
| dm             | nmn               | wc2           | 131.8    |
| FLAGS          | sc2               | 0             |          |
| hs             | nm                | vs            | 4771     |
| aspul          | n                 | th            | 11       |
|                | ai                | cdc           | av       |

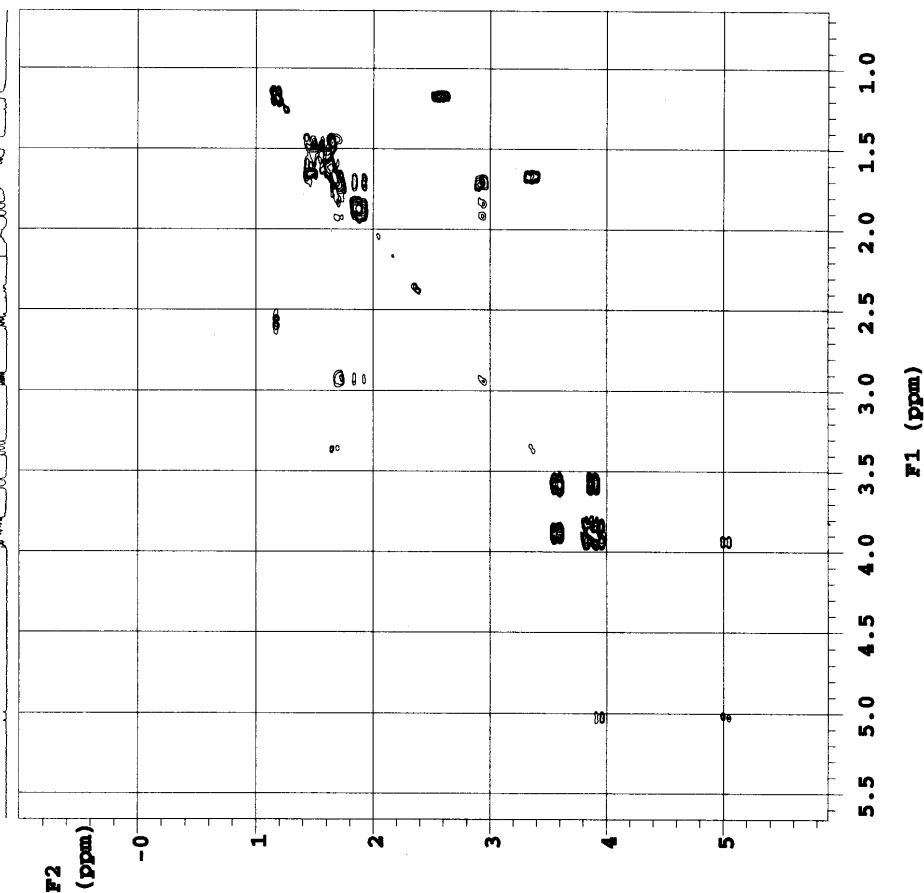

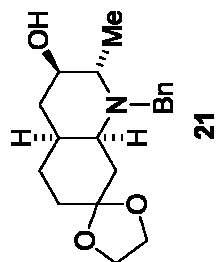

H1 / gHSQC / Mercury-400.qui  
 cdc13/Temp: 25C /N reg: M40005-3561  
 Usuari: san / Mostra: mmc472final  
 Nom: MARISA MENA CERVIGON  
 Data:24/09/05 / Sist automatic  
 Pulse Sequence: gHSQC

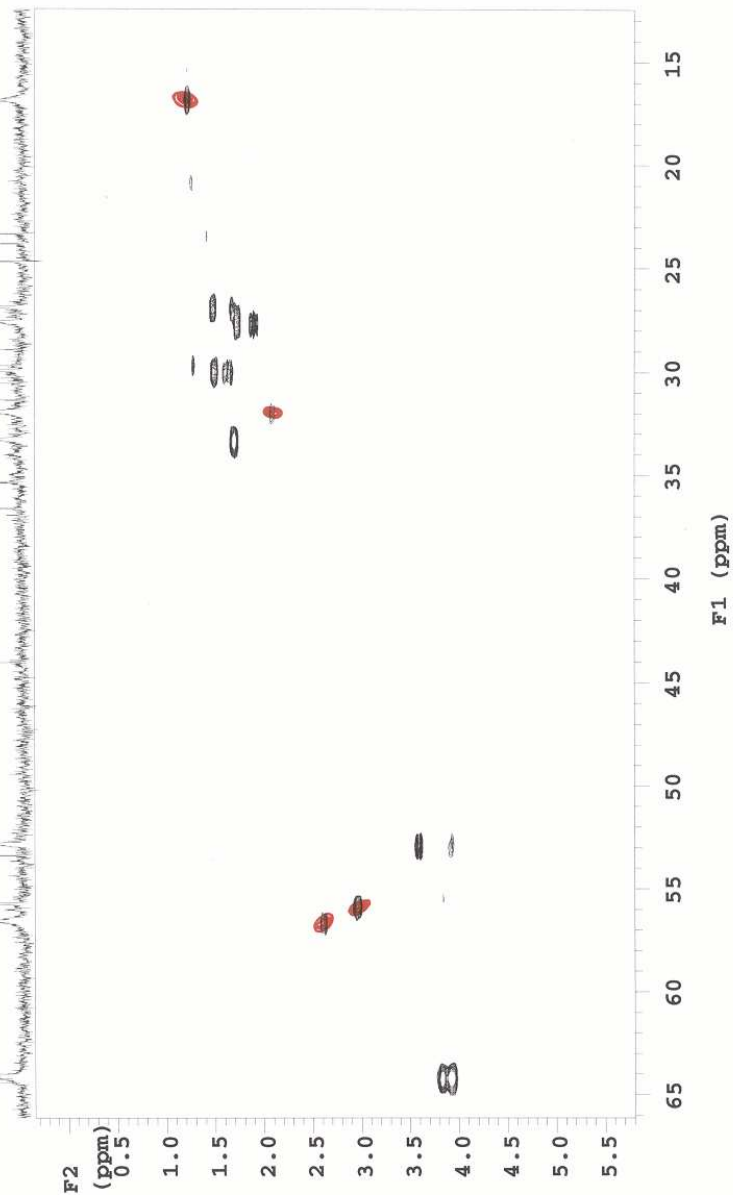

Supplement: Supplementary file 1 [file 4772338]
